# Supplementary material for: Ataluren binds to multiple protein synthesis apparatus sites and competitively inhibits release factor-dependent termination
Source: Nat Commun. 2022 May 6;13:2413. doi: 10.1038/s41467-022-30080-6 (PMC9076611; doi:10.1038/s41467-022-30080-6)
Supplement: Supplementary file 4 — Supplementary Data 1 [file 41467_2022_30080_MOESM4_ESM.xlsx]

## Sheet: Sheet1
nt position	Sequence	PAL_mutations	PAL_effective_depth	PAL_rate	PRE_mutations	PRE_effective_depth	PRE_rate	ave mut count	fold change	Z-factor	z-score	St_reac	pVal
28S-46	U	0	0	#DIV/0!	0	0	#DIV/0!	0	#DIV/0!	#DIV/0!	#DIV/0!	#DIV/0!	#DIV/0!
28S-47	A	0	7029	0	0	7186	0	0	#DIV/0!	#DIV/0!	#DIV/0!	-0.0165155	#DIV/0!
28S-48	G	25	7235	0.00345543	16	7669	0.00208632	20.5	1.65623	-0.319532	1.48538	0.141646	0.132376
28S-49	U	5	7363	0.000679071	15	7746	0.00193648	10	0.350672	-0.479104	1.32513	-0.107127	0.165809
28S-50	C	21	7760	0.00270619	20	7983	0.00250532	20.5	1.08017	-2.60721	0.543357	0.0378834	0.344192
28S-51	A	6	7914	0.00075815	9	8089	0.00111262	7.5	0.681408	-5.56482	0.298561	-0.0340208	0.381552
28S-52	G	9	8102	0.00111084	11	8308	0.00132403	10	0.838985	-104.335	0.0186073	-0.0177547	0.398873
28S-53	C	39	8186	0.00476423	35	8319	0.00420724	37	1.13239	-1.2462	0.872584	0.0954674	0.27263
28S-54	G	12	8284	0.00144858	21	8355	0.00251346	16.5	0.576326	-1.52797	0.775324	-0.0808635	0.295377
28S-55	G	13	8350	0.00155689	7	8393	0.000834028	10	1.86671	-0.614991	1.21363	0.0631959	0.191018
28S-56	A	6	8439	0.000710985	10	8446	0.00118399	8	0.600498	-3.0518	0.483736	-0.0441398	0.354893
28S-57	G	7	8578	0.000816041	12	8486	0.00141409	9.5	0.577077	-2.3392	0.586966	-0.0526184	0.335812
28S-58	G	5	8647	0.000578235	8	8501	0.000941066	6.5	0.614447	-3.80537	0.407877	-0.0372392	0.3671
28S-59	A	4	8766	0.000456308	3	8558	0.000350549	3.5	1.3017	-3.93952	0.3968	-0.00161166	0.36874
28S-60	A	2	8989	0.000222494	3	8480	0.000353774	2.5	0.628917	-7.32739	0.235368	-0.0238254	0.388044
28S-61	A	3	9254	0.000324184	8	8446	0.000947194	5.5	0.342257	-0.925411	1.01796	-0.0615848	0.237624
28S-62	A	18	9551	0.00188462	18	8262	0.00217865	18	0.86504	-48.2156	0.0398248	-0.0132239	0.398626
28S-63	G	19	9933	0.00191282	11	8326	0.00132116	15	1.44783	-0.924806	1.01828	0.0577846	0.237547
28S-64	A	2	10161	0.000196831	7	8184	0.000855327	4.5	0.230124	-0.531681	1.27964	-0.0662203	0.175929
28S-65	A	4	10747	0.000372197	3	8048	0.000372763	3.5	0.99848	-11.9687	0.151133	-0.0112813	0.394412
28S-66	A	9	11563	0.000778345	6	8323	0.000720894	7.5	1.07969	-5.00107	0.326608	-0.000895004	0.378222
28S-67	C	36	12438	0.00289436	36	8742	0.00411805	36	0.702846	-2.46956	0.564914	-0.0730162	0.340105
28S-68	U	11	13071	0.000841558	8	8947	0.000894154	9.5	0.941177	-11.4097	0.157941	-0.0087716	0.393997
28S-69	A	2	14045	0.000142399	3	9139	0.000328263	2.5	0.433796	-2.76218	0.520974	-0.0293131	0.348316
28S-70	A	5	15448	0.000323666	4	11764	0.00034002	4.5	0.951903	-15.1858	0.121094	-0.0132282	0.396028
28S-71	C	36	16535	0.0021772	48	12153	0.00394964	42	0.55124	-0.411572	1.38852	-0.126936	0.152143
28S-72	A	14	17188	0.000814522	16	12280	0.00130293	15	0.625145	-2.32188	0.590027	-0.043899	0.335208
28S-73	A	19	17585	0.00108047	11	12956	0.000849027	15	1.27259	-1.53499	0.773179	0.0172611	0.295868
28S-74	G	15	18401	0.000815173	17	13139	0.00129386	16	0.630033	-2.29989	0.59396	-0.0431145	0.334428
28S-75	G	40	18804	0.00212721	31	13217	0.00234546	35.5	0.906945	-8.9997	0.196006	-0.00374216	0.391352
28S-76	A	57	19089	0.00298601	58	13267	0.00437175	57.5	0.683025	-1.38542	0.821657	-0.0846344	0.284649
28S-77	U	34	19853	0.00171259	40	13558	0.00295029	37	0.580482	-0.706762	1.14837	-0.0908955	0.206322
28S-78	U	12	20610	0.000582242	10	13941	0.000717309	11	0.811703	-25.4562	0.0740847	-0.0190246	0.397849
28S-79	C	79	21301	0.00370875	103	14814	0.00695288	91	0.533411	0.107626	2.19639	-0.222538	0.0357573
28S-80	C	56	22235	0.00251855	70	17077	0.00409908	63	0.614419	-0.534138	1.27759	-0.106794	0.17639
28S-81	C	71	22994	0.00308776	71	18891	0.0037584	71	0.821562	-13.1872	0.138153	-0.0261822	0.395153
28S-82	U	50	24054	0.00207866	56	21251	0.00263517	53	0.788813	-6.33311	0.267281	-0.0313974	0.384944
28S-83	U	14	26096	0.000536481	16	23910	0.000669176	15	0.801703	-16.6927	0.11078	-0.0194846	0.396502
28S-84	A	28	28878	0.000969596	22	26778	0.00082157	25	1.18017	-1.39082	0.819801	0.00903866	0.285083
28S-85	G	21	29914	0.000702012	36	28609	0.00125835	28.5	0.557885	-0.772573	1.10574	-0.0509099	0.216478
28S-86	U	16	31030	0.00051563	16	29191	0.000548114	16	0.940735	-8.55452	0.205138	-0.0117913	0.390636
28S-87	A	33	32050	0.00102964	27	29484	0.000915751	30	1.12437	-1.55559	0.766947	0.00716897	0.297292
28S-88	G	28	32527	0.000860823	42	29655	0.00141629	35	0.607803	-0.998292	0.980837	-0.048588	0.246607
28S-89	C	111	32759	0.00338838	149	29603	0.00503327	130	0.673196	-0.488172	1.31705	-0.0995874	0.167587
28S-90	G	108	33208	0.00325223	124	29653	0.0041817	116	0.777728	-3.15747	0.471441	-0.044484	0.356983
28S-91	G	93	33293	0.00279338	127	29473	0.00430903	110	0.648262	-0.39223	1.40781	-0.0977237	0.148094
28S-92	C	163	33690	0.00483823	261	29471	0.00885616	212	0.546312	0.382549	3.17434	-0.268206	0.00258727
28S-93	G	74	33976	0.00217801	61	29135	0.0020937	67.5	1.04027	-1.35249	0.833161	0.0210994	0.281952
28S-94	A	39	33969	0.00114811	30	28683	0.00104592	34.5	1.0977	-1.60624	0.752041	0.00791655	0.300676
28S-95	G	47	34438	0.00136477	53	28708	0.00184618	50	0.739243	-3.00976	0.488807	-0.0355355	0.354019
28S-96	C	142	34638	0.00409954	142	28497	0.00498298	142	0.822709	-9.47753	0.187067	-0.0287952	0.392023
28S-97	G	123	34794	0.00353509	94	28106	0.00334448	108.5	1.05699	-0.722843	1.13765	0.0488238	0.208865
28S-98	A	13	34682	0.000374834	14	27604	0.000507173	13.5	0.739066	-6.70319	0.25444	-0.021749	0.386235
28S-99	A	30	34830	0.000861326	27	26895	0.0010039	28.5	0.857977	-68.4981	0.0282022	-0.0156646	0.398784
28S-100	G	61	35390	0.00172365	54	26585	0.00203122	57.5	0.848579	-1178.19	0.00166216	-0.0165866	0.398942
28S-101	A	38	35417	0.00107293	35	25224	0.00138757	36.5	0.773246	-5.96272	0.281499	-0.02638	0.383445
28S-102	G	70	35884	0.00195073	35	23675	0.00147835	52.5	1.31953	-0.254579	1.56228	0.0488135	0.117738
28S-103	G	61	36048	0.00169219	50	22226	0.00224962	55.5	0.752211	-3.38378	0.447103	-0.0369522	0.360996
28S-104	G	121	36566	0.00330908	76	20682	0.00367469	98.5	0.900507	-5.81449	0.287623	0.00127502	0.382777
28S-105	A	51	37433	0.00136243	24	20422	0.0011752	37.5	1.15932	-1.11953	0.924733	0.0177363	0.260148
28S-106	A	73	39388	0.00185336	64	20263	0.00315847	68.5	0.58679	-0.30684	1.4998	-0.0942728	0.129556
28S-107	A	47	42648	0.00110204	37	21094	0.00175405	42	0.628285	-1.05366	0.954394	-0.0528631	0.252998
28S-108	A	121	46880	0.00258106	71	22319	0.00318115	96	0.811361	-8.09924	0.215403	-0.0277449	0.389794
28S-109	G	131	51439	0.00254671	61	24467	0.00249315	96	1.02148	-1.24874	0.8716	0.0238774	0.272864
28S-110	C	340	53033	0.0064111	209	25276	0.00826871	274.5	0.775345	-1.68336	0.730428	-0.0736702	0.305532
28S-111	C	143	54533	0.00262227	89	26084	0.00341205	116	0.76853	-2.75948	0.521349	-0.0422837	0.348248
28S-112	C	145	58129	0.00249445	110	28090	0.00391598	127.5	0.636992	-0.237662	1.58363	-0.0944606	0.113849
28S-113	A	138	64141	0.00215151	77	31329	0.00245779	107.5	0.875385	-11.6989	0.154344	-0.0104145	0.394219
28S-114	G	188	73482	0.00255845	98	36801	0.00266297	143	0.96075	-1.73188	0.717454	0.011442	0.308415
28S-115	C	192	79692	0.00240928	153	39852	0.00383921	172.5	0.627545	-0.00850395	1.94347	-0.0963383	0.0603568
28S-116	A	53	89662	0.000591109	37	44460	0.000832209	45	0.710289	-2.35188	0.584746	-0.0273519	0.336249
28S-117	C	197	97061	0.00202965	165	48219	0.00342189	181	0.593138	0.16984	2.36099	-0.098718	0.0245738
28S-118	U	57	104775	0.000544023	34	51946	0.000654526	45.5	0.831171	-27.1851	0.0695403	-0.0176084	0.397979
28S-119	A	105	120441	0.000871796	30	60492	0.000495933	67.5	1.75789	0.295842	2.78347	0.025815	0.00828938
28S-120	A	107	127645	0.000838262	80	65913	0.00121372	93.5	0.690655	-1.00194	0.97905	-0.0345576	0.247039
28S-121	G	176	144205	0.00122048	177	74616	0.00237215	176.5	0.514507	0.398755	3.2599	-0.0910164	0.0019647
28S-122	G	204	147996	0.00137842	121	76862	0.00157425	162.5	0.875602	-9.18474	0.192445	-0.0125758	0.391623
28S-123	G	573	152082	0.0037677	360	79258	0.00454213	466.5	0.829502	-7.00111	0.244966	-0.0248114	0.38715
28S-124	U	157	154585	0.00101562	100	80950	0.00123533	128.5	0.822146	-10.0054	0.178095	-0.019625	0.392665
28S-125	C	304	161423	0.00188325	165	85141	0.00193796	234.5	0.971769	-0.944171	1.00814	0.00583572	0.240001
28S-126	A	144	165067	0.000872373	72	87418	0.000823629	108	1.05918	-0.755679	1.11638	-0.000255386	0.213934
28S-127	A	126	168589	0.00074738	102	90712	0.00112444	114	0.66467	-0.523827	1.28624	-0.0359742	0.174446
28S-128	U	165	175718	0.000939005	104	95705	0.00108667	134.5	0.86411	-18.462	0.100709	-0.0149686	0.396924
28S-129	U	150	181829	0.000824951	117	100942	0.00115908	133.5	0.711728	-0.951069	1.00458	-0.0314516	0.240863
28S-130	G	319	186863	0.00170713	225	105411	0.0021345	272	0.79978	-3.04094	0.485036	-0.0263715	0.35467
28S-131	U	306	189147	0.00161779	186	108547	0.00171354	246	0.944119	-1.39357	0.81886	-0.00120176	0.285303
28S-132	A	152	195974	0.000775613	96	112847	0.000850709	124	0.911725	-4.01435	0.390879	-0.0115007	0.369601
28S-133	U	140	198811	0.000704186	101	115136	0.000877223	120.5	0.802745	-5.46103	0.303357	-0.0203219	0.381002
28S-134	C	353	203032	0.00173864	252	118075	0.00213424	302.5	0.814644	-4.53233	0.354281	-0.0233914	0.374675
28S-135	C	292	203865	0.00143232	189	118654	0.00159287	240.5	0.899209	-3.46048	0.439415	-0.0089979	0.362228
28S-136	U	116	206479	0.0005618	89	120593	0.00073802	102.5	0.761227	-2.58973	0.546002	-0.0225952	0.343696
28S-137	U	184	213289	0.000862679	162	126513	0.0012805	173	0.673705	-0.301464	1.506	-0.0375885	0.128356
28S-138	C	2148	220138	0.00975752	1309	133052	0.00983826	1728.5	0.991793	0.384397	3.18387	0.115453	0.00251004
28S-139	G	532	222586	0.00239009	367	135680	0.00270489	449.5	0.883616	-3.67175	0.419543	-0.00771045	0.365333
28S-140	G	357	224218	0.0015922	313	136802	0.00228798	335	0.695898	-0.0861609	1.80452	-0.0493999	0.0783095
28S-141	G	271	227489	0.00119127	188	139049	0.00135204	229.5	0.881087	-6.04072	0.278381	-0.0124354	0.38378
28S-142	A	196	229499	0.000854034	119	140687	0.000845849	157.5	1.00968	-0.828515	1.07191	-0.00374897	0.2246
28S-143	G	334	232501	0.00143655	274	143453	0.00191003	304	0.752109	-0.870909	1.04762	-0.0338856	0.230457
28S-144	G	1300	233806	0.00556017	911	144989	0.00628324	1105.5	0.884921	-1.87005	0.682915	0.00470774	0.315965
28S-145	C	543	236553	0.00229547	397	147230	0.00269646	470	0.851289	-65.3482	0.0295411	-0.0159235	0.398768
28S-146	A	164	240122	0.000682986	108	149819	0.00072087	136	0.947447	-2.0978	0.632707	-0.00984788	0.326574
28S-147	A	124	241468	0.000513526	91	151742	0.000599702	107.5	0.856301	-43.2398	0.044304	-0.0161016	0.398551
28S-148	U	272	245422	0.0011083	257	156846	0.00163855	264.5	0.676388	-0.0673024	1.83641	-0.043068	0.0738934
28S-149	U	187	250280	0.000747163	159	163598	0.000971895	173	0.76877	-2.01998	0.649011	-0.0238335	0.32318
28S-150	U	723	255271	0.00283228	1028	171239	0.00600331	875.5	0.471787	0.771221	8.56723	-0.229142	4.60112e-17
28S-151	C	2933	266518	0.0110049	2948	190960	0.0154378	2940.5	0.712854	0.585261	4.72587	-0.213818	5.63872e-06
28S-152	G	716	268060	0.00267104	577	198583	0.00290559	646.5	0.919279	-0.942441	1.00904	0.00267359	0.239783
28S-153	A	458	271736	0.00168546	346	203664	0.00169888	402	0.992102	-0.25962	1.55603	0.00632218	0.118891
28S-154	C	1602	274469	0.00583672	1379	206204	0.00668755	1490.5	0.872774	-2.6749	0.533348	-0.00155451	0.346051
28S-155	C	637	278785	0.00228491	669	210429	0.00317922	653	0.718703	0.0775707	2.12482	-0.0554011	0.0417366
28S-156	G	975	281031	0.00346937	829	212716	0.00389722	902	0.890217	-1.75459	0.711541	-0.00141327	0.309721
28S-157	A	113	283192	0.000399023	127	215804	0.000588497	120	0.678037	-0.595349	1.22857	-0.0259609	0.187565
28S-158	U	165	283436	0.000582142	140	217726	0.00064301	152.5	0.905339	-3.94384	0.396453	-0.0131107	0.368791
28S-159	G	358	285394	0.00125441	359	219711	0.00163396	358.5	0.767707	-1.05978	0.951556	-0.0289816	0.253683
28S-160	C	1918	286584	0.00669263	2154	220243	0.00978011	2036	0.68431	0.596226	4.8542	-0.167725	3.04942e-06
28S-161	A	437	287746	0.0015187	393	221098	0.00177749	415	0.854406	-29.0732	0.0651743	-0.015605	0.398096
28S-162	G	346	288039	0.00120123	282	224020	0.00125882	314	0.954251	-0.895892	1.03381	-0.00406795	0.233792
28S-163	U	171	286356	0.000597159	161	223230	0.000721229	166	0.827974	-11.1671	0.161091	-0.0179363	0.393799
28S-164	G	325	285458	0.00113852	471	221891	0.00212266	398	0.536364	0.568169	4.53881	-0.0788241	1.34121e-05
28S-165	U	1038	283554	0.00366068	1796	220286	0.00815304	1417	0.448996	0.833536	11.7743	-0.322731	3.13817e-31
28S-166	U	313	286178	0.00109372	382	226164	0.00168904	347.5	0.647542	0.221121	2.51644	-0.0484614	0.0168204
28S-167	U	571	286084	0.00199592	610	229891	0.00265343	590.5	0.752202	-0.334063	1.4692	-0.0406229	0.135578
28S-168	G	1429	290277	0.00492288	2086	246266	0.00847052	1757.5	0.581179	0.751411	7.88449	-0.229512	1.26447e-14
28S-169	G	855	290006	0.00294821	924	248918	0.00371207	889.5	0.794225	-0.973029	0.993397	-0.0355925	0.243569
28S-170	G	728	291274	0.00249936	773	249695	0.00309578	750.5	0.807347	-1.84812	0.688173	-0.0286106	0.314828
28S-171	A	650	290676	0.00223617	538	247453	0.00217415	594	1.02852	0.160185	2.33385	0.0201474	0.0261905
28S-172	G	381	288393	0.00132111	323	243611	0.00132588	352	0.996402	-0.30645	1.50025	0.00184347	0.129469
28S-173	C	1071	286155	0.00374273	1137	239943	0.00473863	1104	0.789834	-0.63489	1.19886	-0.0428221	0.194452
28S-174	C	700	280050	0.00249955	822	233368	0.00352233	761	0.70963	0.206103	2.46883	-0.0625989	0.0189394
28S-175	U	470	273754	0.00171687	454	228896	0.00198343	462	0.865605	-8.38842	0.208768	-0.0134137	0.390343
28S-176	C	944	273647	0.0034497	982	231862	0.00423528	963	0.814516	-2.05085	0.642444	-0.0302113	0.324553
28S-177	G	541	272491	0.00198539	523	234200	0.00223313	532	0.889058	-2.68209	0.532307	-0.00810482	0.346243
28S-178	U	340	272379	0.00124826	302	235608	0.00128179	321	0.973842	-0.595517	1.22844	-0.00148264	0.187594
28S-179	A	398	271974	0.00146338	284	233952	0.00121392	341	1.20549	0.390891	3.21782	0.0241284	0.00225161
28S-180	A	396	263364	0.00150362	306	224422	0.0013635	351	1.10276	0.197296	2.44175	0.0159832	0.0202418
28S-181	G	272	259941	0.00104639	279	221542	0.00125935	275.5	0.830895	-9.98557	0.178416	-0.0186509	0.392643
28S-182	A	306	255195	0.00119908	321	218422	0.00146963	313.5	0.815907	-4.57706	0.35144	-0.0210759	0.375051
28S-183	C	774	246179	0.00314405	1003	213030	0.00470826	888.5	0.667774	0.450344	3.56587	-0.0966204	0.000691504
28S-184	C	582	243753	0.00238766	798	211263	0.00377728	690	0.632111	0.491521	3.85463	-0.0934312	0.000236861
28S-185	G	649	240073	0.00270334	653	207995	0.0031395	651	0.861075	-9.83517	0.180892	-0.0129412	0.392468
28S-186	U	175	240447	0.000727811	232	210313	0.00110312	203.5	0.659776	-0.0942103	1.79125	-0.0361121	0.0802009
28S-187	C	956	238867	0.00400223	1184	207536	0.00570503	1070	0.701526	0.370343	3.11281	-0.0954975	0.00313942
28S-188	G	694	232716	0.00298218	638	203110	0.00314116	666	0.949388	-0.359175	1.44205	0.0131109	0.141042
28S-189	C	1045	227271	0.00459803	1379	199783	0.00690249	1212	0.666142	0.533957	4.20562	-0.135011	5.7567e-05
28S-190	U	323	218595	0.00147762	303	193838	0.00156316	313	0.945276	-1.06262	0.95025	-0.00237592	0.253999
28S-191	U	457	205829	0.00222029	670	186256	0.0035972	563.5	0.617227	0.47837	3.75745	-0.0947921	0.000342867
28S-192	G	235	204076	0.00115153	261	183972	0.00141869	248	0.811684	-4.54845	0.353252	-0.0214804	0.374812
28S-193	U	447	196962	0.00226947	482	181142	0.0026609	464.5	0.852898	-38.2366	0.0499533	-0.0155293	0.398445
28S-194	C	963	194071	0.0049621	1088	175058	0.00621508	1025.5	0.798397	-0.995313	0.982302	-0.0460211	0.246253
28S-195	C	696	181158	0.00384195	869	165381	0.00525453	782.5	0.731169	0.0595686	2.08415	-0.0746337	0.0454665
28S-196	A	545	174693	0.00311976	386	157468	0.00245129	465.5	1.2727	0.547975	4.33604	0.0810282	3.2981e-05
28S-197	G	313	173417	0.0018049	312	155054	0.0020122	312.5	0.896976	-3.0307	0.486268	-0.00744074	0.354458
28S-198	U	350	171209	0.00204429	359	152003	0.0023618	354.5	0.865564	-9.74499	0.182411	-0.012831	0.39236
28S-199	C	362	166170	0.00217849	481	139753	0.00344179	421.5	0.632954	0.346876	3.00096	-0.0863273	0.0044191
28S-200	U	130	156552	0.000830395	122	126490	0.000964503	126	0.860956	-23.8773	0.0787868	-0.0154282	0.397706
28S-201	A	83	154796	0.00053619	69	118713	0.000581234	76	0.922502	-4.42182	0.361502	-0.012501	0.373708
28S-202	A	107	150080	0.000712953	83	110798	0.000749111	95	0.951732	-2.53156	0.554996	-0.00928524	0.341999
28S-203	A	172	149594	0.00114978	127	108585	0.00116959	149.5	0.983061	-1.19648	0.892338	-0.00178596	0.267919
28S-204	G	140	151527	0.000923928	134	108722	0.0012325	137	0.749636	-1.69768	0.72655	-0.0280102	0.306396
28S-205	U	639	148633	0.00429918	511	106489	0.00479862	575	0.89592	-2.04615	0.643434	0.00464978	0.324347
28S-206	C	339	147485	0.00229854	401	102828	0.00389972	370	0.589412	0.43809	3.4881	-0.111561	0.000909721
28S-207	C	390	145250	0.00268503	425	99813	0.00425796	407.5	0.630589	0.343759	2.98671	-0.103828	0.00461176
28S-208	U	208	143907	0.00144538	207	98550	0.00210046	207.5	0.688126	-0.300596	1.507	-0.0482379	0.128161
28S-209	C	1434	152226	0.0094202	1563	105374	0.0148329	1498.5	0.635089	0.649497	5.59196	-0.314405	6.46716e-08
28S-210	A	99	159594	0.000620324	70	113191	0.000618424	84.5	1.00307	-1.57247	0.761915	-0.00756504	0.298437
28S-211	U	109	170378	0.000639754	119	134794	0.000882829	114	0.724664	-1.32185	0.844153	-0.0268194	0.279365
28S-212	G	700	180602	0.00387593	519	141707	0.00366249	609.5	1.05828	0.276547	2.70923	0.0554782	0.010164
28S-213	A	134	181179	0.0007396	132	140819	0.000937374	133	0.789013	-3.64515	0.421945	-0.0217916	0.364964
28S-214	A	140	189788	0.000737665	151	145623	0.00103692	145.5	0.711397	-0.841118	1.06457	-0.0299097	0.226368
28S-215	U	117	202305	0.000578335	117	153670	0.000761372	117	0.759596	-2.26193	0.600872	-0.0229042	0.33305
28S-216	G	178	214726	0.000828963	145	160184	0.000905209	161.5	0.91577	-3.08145	0.480222	-0.0108356	0.355495
28S-217	U	220	214506	0.00102561	216	159598	0.0013534	218	0.757804	-1.34078	0.837328	-0.0280997	0.280973
28S-218	G	260	222814	0.00116689	226	164065	0.0013775	243	0.847107	-114.851	0.0169183	-0.0167541	0.398885
28S-219	G	692	223175	0.00310071	535	163173	0.00327873	613.5	0.945704	-0.471812	1.33169	0.013274	0.164369
28S-220	C	2022	226903	0.0089113	1694	165436	0.0102396	1858	0.870277	-2.67452	0.533403	0.00399051	0.346041
28S-221	C	1052	234917	0.00447818	907	171151	0.00529941	979.5	0.845033	-26.1292	0.0722469	-0.0184657	0.397902
28S-222	C	816	242049	0.00337122	860	176311	0.00487774	838	0.691143	0.339948	2.96946	-0.0888001	0.0048548
28S-223	G	1212	251659	0.00481604	903	183498	0.00492103	1057.5	0.978664	0.148342	2.30139	0.0434271	0.0282363
28S-224	A	606	257052	0.0023575	1027	187652	0.0054729	816.5	0.430759	0.793829	9.50667	-0.231442	9.45853e-21
28S-225	U	159	272571	0.000583334	126	197320	0.000638557	142.5	0.91352	-3.49494	0.436046	-0.0126437	0.362763
28S-226	U	237	293568	0.000807309	295	209665	0.00140701	266	0.573778	0.382465	3.17391	-0.0528734	0.0025908
28S-227	G	324	308089	0.00105164	306	219817	0.00139207	315	0.755455	-0.897209	1.0331	-0.0287377	0.233965
28S-228	C	2612	313655	0.00832762	2369	225071	0.0105256	2490.5	0.79118	-0.11697	1.75475	-0.0736177	0.0855627
28S-229	C	1265	335227	0.00377356	1188	245082	0.00484736	1226.5	0.778478	-0.293769	1.51495	-0.0485948	0.126631
28S-230	C	721	362561	0.00198863	790	274932	0.00287344	755.5	0.692074	0.300615	2.80246	-0.0588465	0.00786104
28S-231	A	393	374331	0.00104987	281	285433	0.000984469	337	1.06644	0.0587822	2.08241	0.0035905	0.0456318
28S-232	G	760	392256	0.00193751	640	303045	0.0021119	700	0.917426	-0.9131	1.02452	-0.00293551	0.23604
28S-233	A	174	400584	0.000434366	133	310578	0.000428234	153.5	1.01432	-0.783884	1.09873	-0.0098654	0.218158
28S-234	G	435	419967	0.0010358	453	323162	0.00140177	444	0.738918	-0.341578	1.46097	-0.0309999	0.137223
28S-235	A	483	430746	0.00112131	392	331723	0.00118171	437.5	0.948889	-0.687722	1.16133	-0.00542541	0.203258
28S-236	G	591	452043	0.0013074	659	348226	0.00189245	625	0.69085	0.237726	2.57125	-0.0446123	0.014631
28S-237	G	602	455693	0.00132106	554	351084	0.00157797	578	0.837193	-10.6995	0.167528	-0.0182579	0.393383
28S-238	G	1181	460685	0.00256357	1012	355858	0.00284383	1096.5	0.901451	-0.975616	0.992096	-0.0024953	0.243883
28S-239	U	566	466996	0.001212	484	363245	0.00133243	525	0.909615	-1.48209	0.789656	-0.00892503	0.292083
28S-240	G	612	484526	0.00126309	571	379350	0.00150521	591.5	0.839148	-12.8841	0.141169	-0.0179013	0.394987
28S-241	U	1107	488738	0.00226502	1006	384152	0.00261876	1056.5	0.864921	-5.47548	0.30268	-0.0125882	0.38108
28S-242	C	2413	509689	0.00473426	2595	402287	0.00645062	2504	0.733923	0.461454	3.63943	-0.0861944	0.000530516
28S-243	A	2298	514793	0.00446393	1819	407987	0.00445848	2058.5	1.00122	0.474948	3.73296	0.0472378	0.000375807
28S-244	G	1301	526684	0.00247017	1348	425514	0.00316793	1324.5	0.779742	-0.267051	1.5469	-0.0371045	0.120587
28S-245	G	888	532844	0.00166653	798	431467	0.0018495	843	0.901068	-1.2674	0.864426	-0.00746386	0.274568
28S-246	C	1982	537237	0.00368925	1927	435021	0.00442967	1954.5	0.832849	-3.63107	0.423228	-0.0232137	0.364766
28S-247	C	839	541027	0.00155075	863	438726	0.00196706	851	0.788362	-0.815283	1.07972	-0.0277076	0.22272
28S-248	C	1117	540981	0.00206477	1311	439607	0.00298221	1214	0.692362	0.447225	3.54574	-0.0603683	0.000742797
28S-249	G	1202	542858	0.00221421	1136	442411	0.00256775	1169	0.862315	-6.34233	0.266945	-0.0132932	0.384978
28S-250	U	441	548578	0.000803897	424	448835	0.000944668	432.5	0.850983	-77.8577	0.0248549	-0.0163352	0.398819
28S-251	A	491	555895	0.00088326	411	454809	0.000903676	451	0.977408	-0.311972	1.49393	-0.00561452	0.130699
28S-252	G	666	558181	0.00119316	893	457024	0.00195395	779.5	0.610642	0.571737	4.57663	-0.0602425	1.12889e-05
28S-253	G	592	555196	0.00106629	596	452581	0.00131689	594	0.809702	-2.3984	0.576742	-0.0213692	0.337816
28S-254	A	1659	557617	0.00297516	1448	454670	0.00318473	1553.5	0.934196	-0.0403185	1.88404	0.0089784	0.0676276
28S-255	C	7226	557388	0.012964	3263	453709	0.00719183	5244.5	1.80261	0.925872	26.4408	0.627545	6.16794e-153
28S-256	G	1790	563958	0.003174	1634	460155	0.00355098	1712	0.893837	-0.839606	1.06545	-0.00154793	0.226157
28S-257	G	1906	567200	0.00336037	1902	460774	0.00412784	1904	0.814074	-1.14184	0.915099	-0.0300349	0.262464
28S-258	A	309	571589	0.000540598	334	464158	0.000719583	321.5	0.751266	-0.789565	1.09524	-0.0231164	0.218994
28S-259	U	563	572299	0.000983752	565	464079	0.00121747	564	0.808033	-2.34197	0.58648	-0.0211937	0.335908
28S-260	G	2688	572568	0.00469464	2078	462609	0.00449191	2383	1.04513	0.612537	5.05854	0.066237	1.10755e-06
28S-261	A	1756	569323	0.00308437	1453	458208	0.00317105	1604.5	0.972664	0.279407	2.71998	0.0203239	0.00987168
28S-262	G	1790	570556	0.00313729	1533	457873	0.00334809	1661.5	0.937039	0.0247463	2.00973	0.0111799	0.0529476
28S-263	C	8856	566091	0.0156441	7544	450190	0.0167574	8200	0.933567	0.543804	4.2964	0.116638	3.91367e-05
28S-264	G	2740	565932	0.00484157	2429	448114	0.0054205	2584.5	0.893197	-0.518939	1.29037	0.00600645	0.173518
28S-265	C	2289	562641	0.00406831	2132	444649	0.00479479	2210.5	0.848486	-151.022	0.0128929	-0.0167252	0.398909
28S-266	U	574	559791	0.00102538	635	442292	0.0014357	604.5	0.714202	0.0763588	2.12204	-0.0346826	0.0419844
28S-267	C	2577	556788	0.00462833	2319	437803	0.0052969	2448	0.873781	-1.75035	0.712635	-0.00416498	0.30948
28S-268	G	935	554304	0.0016868	748	436757	0.00171262	841.5	0.984922	0.0882429	2.1497	0.00535219	0.039576
28S-269	G	4129	552455	0.00747391	3384	435720	0.00776646	3756.5	0.962332	0.488828	3.83432	0.0661757	0.000256096
28S-270	C	2270	553798	0.00409897	3011	435838	0.00690853	2640.5	0.59332	0.785896	9.15443	-0.182358	2.5305e-19
28S-271	A	780	546342	0.00142768	905	425500	0.00212691	842.5	0.671245	0.423663	3.40079	-0.052009	0.00122892
28S-272	U	504	540290	0.000932832	503	420185	0.00119709	503.5	0.779249	-1.04044	0.960575	-0.0243511	0.251505
28S-273	U	427	533928	0.000799733	449	417480	0.0010755	438	0.743592	-0.414742	1.38541	-0.0271565	0.152801
28S-274	C	2886	527893	0.00546702	2477	413734	0.00598694	2681.5	0.913157	-0.0396091	1.88532	0.0195819	0.067464
28S-275	C	1636	524431	0.00311957	1565	421125	0.00371624	1600.5	0.839444	-7.70238	0.225226	-0.0198335	0.388951
28S-276	G	2759	523094	0.00527439	2593	424026	0.00611519	2676	0.862506	-3.78529	0.409588	-0.00873191	0.366844
28S-277	A	729	518573	0.00140578	705	421034	0.00167445	717	0.839548	-12.1459	0.149096	-0.0179941	0.394533
28S-278	G	812	511357	0.00158793	860	414631	0.00207413	836	0.765588	-0.312316	1.49354	-0.0327526	0.130776
28S-279	G	503	509044	0.000988127	454	413031	0.00109919	478.5	0.898958	-2.13267	0.625664	-0.0113537	0.328025
28S-280	U	792	505720	0.00156608	850	411147	0.00206739	821	0.757519	-0.201216	1.63168	-0.0342664	0.105386
28S-281	C	2444	503601	0.00485305	2399	407318	0.00588975	2421.5	0.823982	-1.66893	0.734378	-0.0303255	0.304649
28S-282	U	1964	495927	0.00396026	2279	401605	0.00567473	2121.5	0.697876	0.564985	4.50559	-0.0970226	1.55866e-05
28S-283	C	884	490644	0.00180171	853	395525	0.00215663	868.5	0.835431	-7.28725	0.236508	-0.0192536	0.387939
28S-284	U	1370	483557	0.00283317	1676	393690	0.00425716	1523	0.665508	0.586327	4.73804	-0.0898516	5.32304e-06
28S-285	C	1904	479823	0.00396813	2184	390267	0.00559617	2044	0.70908	0.517731	4.06412	-0.0900205	0.000103339
28S-286	U	534	471317	0.001133	581	390717	0.00148701	557.5	0.761929	-0.535886	1.27614	-0.0286674	0.176718
28S-287	A	717	466634	0.00153654	716	387117	0.00184957	716.5	0.830753	-5.75854	0.290004	-0.0196763	0.382514
28S-288	G	696	459423	0.00151494	811	382977	0.00211762	753.5	0.715399	0.164533	2.34599	-0.0430735	0.0254565
28S-289	A	345	446745	0.000772253	329	375233	0.000876789	337	0.880774	-4.80335	0.337736	-0.0138953	0.376826
28S-290	G	423	430959	0.000981532	428	361408	0.00118426	425.5	0.828817	-6.91734	0.247558	-0.0187547	0.386903
28S-291	U	302	417513	0.000723331	356	354128	0.00100529	329	0.719527	-0.308418	1.49799	-0.0287335	0.129908
28S-292	C	971	404512	0.00240042	1200	336921	0.00356167	1085.5	0.673961	0.483254	3.79297	-0.0750435	0.000299848
28S-293	G	587	391788	0.00149826	587	325081	0.0018057	587	0.829737	-6.06773	0.277317	-0.0197736	0.383893
28S-294	U	443	379594	0.00116704	364	317881	0.00114508	403.5	1.01917	-0.0699173	1.83192	0.00178848	0.0745043
28S-295	G	553	359179	0.00153962	776	293770	0.00264152	664.5	0.582854	0.592962	4.81528	-0.0825226	3.68081e-06
28S-296	U	241	340822	0.000707114	213	275712	0.000772545	227	0.915304	-2.45988	0.566493	-0.0117018	0.339801
28S-297	U	192	303495	0.00063263	269	246388	0.00109177	230.5	0.579451	0.31942	2.8799	-0.0441459	0.0063086
28S-298	G	235	272227	0.00086325	231	220527	0.00104749	233	0.824112	-7.6496	0.2266	-0.0189588	0.38883
28S-299	C	1230	250377	0.00491259	1335	200332	0.00666394	1282.5	0.737191	0.223886	2.5254	-0.0864541	0.0164445
28S-300	U	252	234295	0.00107557	205	189327	0.00108278	228.5	0.993336	-0.654335	1.18477	-0.00183441	0.197746
28S-301	U	566	222280	0.00254634	702	176486	0.00397765	634	0.640161	0.446617	3.54185	-0.0945045	0.000753123
28S-302	G	540	229119	0.00235685	430	179779	0.00239183	485	0.985379	-0.197373	1.63692	0.0141272	0.104488
28S-303	A	220	218295	0.00100781	190	168963	0.00112451	205	0.896225	-4.05878	0.387445	-0.0115235	0.370095
28S-304	G	229	206717	0.00110779	232	157872	0.00146954	230.5	0.753835	-1.17503	0.901138	-0.0296415	0.265813
28S-305	A	92	200930	0.000457871	77	152170	0.000506013	84.5	0.90486	-5.69892	0.292584	-0.0138588	0.382227
28S-306	A	112	188087	0.000595469	118	139663	0.000844891	115	0.704788	-0.967957	0.995957	-0.0279535	0.242949
28S-307	U	121	170031	0.000711635	126	130965	0.000962089	123.5	0.739677	-1.56265	0.764833	-0.0263881	0.297773
28S-308	G	232	161214	0.00143908	185	125131	0.00147845	208.5	0.973371	-0.989954	0.984947	0.00075845	0.245613
28S-309	C	1295	159608	0.00811363	1138	122673	0.00927669	1216.5	0.874625	-2.77673	0.518967	0.00584977	0.34868
28S-310	A	288	154461	0.00186455	238	118620	0.00200641	263	0.929297	-1.67825	0.731822	-0.00137717	0.305221
28S-311	G	403	155515	0.00259139	298	117301	0.00254047	350.5	1.02004	-0.145479	1.71107	0.0243012	0.0922894
28S-312	C	903	153432	0.00588534	864	114009	0.00757835	883.5	0.7766	-0.482508	1.32208	-0.0680051	0.166478
28S-313	G	572	154473	0.00370291	432	114524	0.00377214	502	0.981649	-0.209551	1.62044	0.0304897	0.10733
28S-314	C	263	145637	0.00180586	332	106679	0.00311214	297.5	0.580263	0.399115	3.26186	-0.0950398	0.0019522
28S-315	U	224	141401	0.00158415	199	105735	0.00188206	211.5	0.841708	-30.5001	0.062222	-0.0177958	0.398171
28S-316	A	45	141277	0.000318523	43	103877	0.000413951	44	0.769471	-5.02123	0.325515	-0.0196051	0.378356
28S-317	A	55	142409	0.000386212	31	104945	0.000295393	43	1.30745	-0.405443	1.39458	-0.00379704	0.150866
28S-318	U	84	125049	0.000671737	72	96212	0.000748347	78	0.897627	-6.97238	0.245849	-0.0130949	0.387066
28S-319	C	1340	123029	0.0108917	1287	92943	0.0138472	1313.5	0.786566	-0.418568	1.38168	-0.0976373	0.153593
28S-320	A	314	118777	0.00264361	229	89167	0.00256821	271.5	1.02936	-0.240611	1.57987	0.0269933	0.114529
28S-321	G	164	128155	0.0012797	153	95881	0.00159573	158.5	0.801954	-4.47394	0.35806	-0.023558	0.374171
28S-322	G	110	126386	0.00087035	85	95071	0.000894069	97.5	0.973471	-1.9104	0.673446	-0.006061	0.318
28S-323	U	131	123020	0.00106487	121	95406	0.00126826	126	0.839626	-30.6394	0.061948	-0.0176261	0.398178
28S-324	G	99	119925	0.000825516	139	91470	0.00151962	119	0.543237	0.188312	2.41472	-0.0601418	0.0216148
28S-325	G	442	116313	0.00380009	350	87347	0.00400701	396	0.948362	-0.784074	1.09861	0.020891	0.218186
28S-326	U	75	114882	0.000652844	58	87484	0.000662978	66.5	0.984714	-2.25089	0.602911	-0.00806322	0.332642
28S-327	A	141	108674	0.00129746	99	79292	0.00124855	120	1.03917	-0.780877	1.10058	0.00578735	0.217713
28S-328	A	72	99480	0.000723764	57	67871	0.000839828	64.5	0.861799	-31.6483	0.0600337	-0.0155023	0.398224
28S-329	A	59	94037	0.000627413	53	62849	0.000843291	56	0.744005	-2.98687	0.491614	-0.0248263	0.353532
28S-330	C	387	87727	0.00441141	388	58442	0.00663906	387.5	0.664463	0.183275	2.39983	-0.131535	0.0224038
28S-331	U	162	73132	0.00221517	174	49391	0.00352291	168	0.628791	-0.0127701	1.93529	-0.08935	0.0613227
28S-332	C	202	71008	0.00284475	178	47666	0.00373432	190	0.761786	-1.63604	0.743541	-0.0470825	0.302594
28S-333	C	133	70726	0.0018805	136	48240	0.00281924	134.5	0.667023	-0.407396	1.39264	-0.0646801	0.151274
28S-334	A	48	77817	0.000616832	29	51663	0.00056133	38.5	1.09888	-1.4802	0.79026	-0.00334137	0.291944
28S-335	U	111	70632	0.00157153	120	48630	0.00246761	115.5	0.636861	-0.274809	1.53749	-0.0656622	0.12235
28S-336	C	117	69064	0.00169408	100	47211	0.00211815	108.5	0.799793	-5.3329	0.309495	-0.0262936	0.380286
28S-337	U	48	68003	0.000705851	54	46582	0.00115925	51	0.608888	-0.660769	1.18018	-0.042649	0.198822
28S-338	A	68	71824	0.000946759	64	48302	0.001325	66	0.714537	-1.81091	0.697284	-0.0332402	0.312847
28S-339	A	79	70331	0.00112326	42	47954	0.000875839	60.5	1.2825	-0.244544	1.57487	0.0191422	0.115434
28S-340	G	182	69495	0.00261889	143	47567	0.00300629	162.5	0.871139	-10.9755	0.163668	-0.0102517	0.393635
28S-341	G	204	68124	0.00299454	184	46877	0.00392517	194	0.762908	-1.64237	0.741758	-0.0482311	0.302994
28S-342	C	180	67485	0.00266726	154	46447	0.00331561	167	0.804456	-4.65466	0.346617	-0.0303695	0.375683
28S-343	U	43	64894	0.000662619	35	45173	0.000774799	39	0.855214	-84.7281	0.022863	-0.0160598	0.398838
28S-344	A	22	62247	0.000353431	21	42556	0.000493467	21.5	0.716219	-3.99042	0.392752	-0.0226663	0.36933
28S-345	A	21	60095	0.000349447	11	40755	0.000269906	16	1.2947	-1.36782	0.827767	-0.0052176	0.283218
28S-346	A	37	58059	0.000637283	42	39472	0.00106405	39.5	0.598924	-0.798761	1.08964	-0.0414984	0.220337
28S-347	U	33	54569	0.000604739	26	38782	0.000670414	29.5	0.902038	-10.9446	0.164092	-0.0131734	0.393607
28S-348	A	36	52277	0.000688639	27	37383	0.000722253	31.5	0.953459	-5.04441	0.324266	-0.00942731	0.37851
28S-349	U	45	48509	0.000927663	45	36072	0.0012475	45	0.743615	-3.4174	0.4437	-0.0288556	0.361543
28S-350	G	246	48837	0.00503716	175	35996	0.00486165	210.5	1.0361	-0.363926	1.43703	0.0689262	0.142066
28S-351	A	66	47502	0.00138942	67	34234	0.00195712	66.5	0.709929	-1.69424	0.727477	-0.0420659	0.30619
28S-352	A	61	46620	0.00130845	42	33378	0.00125831	51.5	1.03984	-1.712	0.722713	0.00604123	0.307249
28S-353	U	40	44264	0.000903669	46	32707	0.00140643	43	0.642528	-1.15313	0.910301	-0.0437784	0.263616
28S-354	G	46	43243	0.00106376	33	31747	0.00103947	39.5	1.02337	-2.35635	0.583968	0.000509565	0.336402
28S-355	U	51	41284	0.00123535	40	30503	0.00131135	45.5	0.942044	-4.6035	0.349782	-0.00505176	0.375269
28S-356	G	107	41236	0.00259482	88	29875	0.00294561	97.5	0.880912	-9.77244	0.181946	-0.00767485	0.392393
28S-357	A	64	39168	0.00163399	35	27877	0.00125552	49.5	1.30145	-0.326228	1.47788	0.0368343	0.133855
28S-358	G	48	37396	0.00128356	46	26194	0.00175613	47	0.730904	-2.82988	0.511765	-0.035983	0.349976
28S-359	A	43	35823	0.00120035	38	24784	0.00153325	40.5	0.782878	-6.62683	0.256988	-0.0260288	0.385984
28S-360	C	106	33163	0.00319633	90	22409	0.00401624	98	0.795851	-5.15637	0.318369	-0.0365422	0.379228
28S-361	C	100	31602	0.00316436	109	20792	0.0052424	104.5	0.603608	-0.13182	1.73172	-0.137297	0.0890664
28S-362	A	20	29827	0.000670533	15	19202	0.000781169	17.5	0.858372	-84.5374	0.0229139	-0.0158244	0.398838
28S-363	A	20	29486	0.000678288	18	19614	0.000917712	19	0.739108	-5.51949	0.300637	-0.0259817	0.381315
28S-364	U	23	28762	0.000799666	16	19462	0.000822115	19.5	0.972694	-5.57425	0.298133	-0.00696233	0.381601
28S-365	A	13	27891	0.0004661	18	18313	0.000982908	15.5	0.474205	-0.734444	1.13005	-0.0511052	0.210675
28S-366	G	42	27058	0.00155222	38	17221	0.00220661	40	0.703442	-2.31713	0.590873	-0.0466672	0.33504
28S-367	A	19	26679	0.000712171	13	17037	0.000763045	16	0.933327	-9.44343	0.187678	-0.0104696	0.391978
28S-368	A	20	25888	0.000772559	22	16186	0.0013592	21	0.568393	-1.15236	0.910629	-0.0523254	0.263537
28S-369	G	26	25550	0.00101761	18	15876	0.00113379	22	0.897534	-14.174	0.129168	-0.0113429	0.395628
28S-370	A	16	24971	0.000640743	11	15467	0.000711192	13.5	0.900943	-17.1405	0.108045	-0.0130432	0.39662
28S-371	C	72	24785	0.00290498	69	15122	0.00456289	70.5	0.636654	-0.636269	1.19785	-0.107482	0.194688
28S-372	A	16	24123	0.000663267	11	14416	0.000763041	13.5	0.869242	-44.7169	0.0428726	-0.0150616	0.398576
28S-373	A	41	22749	0.00180228	29	13368	0.00216936	35	0.830788	-30.0117	0.063202	-0.0202158	0.398146
28S-374	G	26	22558	0.00115258	11	13323	0.00082564	18.5	1.39599	-0.898039	1.03264	0.025898	0.234074
28S-375	U	13	21717	0.000598609	14	12758	0.00109735	13.5	0.545504	-1.44276	0.802373	-0.0477853	0.289141
28S-376	A	19	21350	0.00088993	12	12194	0.000984091	15.5	0.904317	-15.0203	0.122345	-0.011399	0.395968
28S-377	C	52	20494	0.00253733	42	11445	0.00366972	47	0.691422	-1.82285	0.694333	-0.070802	0.31349
28S-378	C	68	19866	0.00342293	43	10885	0.00395039	55.5	0.86648	-25.2259	0.0747353	-0.010013	0.39783
28S-379	G	48	19362	0.00247908	34	10542	0.00322519	41	0.768661	-5.26255	0.312972	-0.0408327	0.379875
28S-380	C	63	19187	0.00328347	51	10492	0.00486085	57	0.675494	-1.30491	0.850359	-0.0956928	0.2779
28S-381	G	40	18850	0.00212202	37	10324	0.00358388	38.5	0.5921	-0.77941	1.10149	-0.102959	0.217496
28S-382	A	13	18337	0.000708949	13	9969	0.00130404	13	0.543655	-1.47965	0.790433	-0.0539016	0.291904
28S-383	G	18	17894	0.00100592	9	9600	0.0009375	13.5	1.07299	-3.68832	0.41806	0.00320787	0.36556
28S-384	G	30	17382	0.00172592	12	9163	0.00130961	21	1.31789	-1.03	0.965516	0.0411548	0.250312
28S-385	G	25	17006	0.00147007	20	8669	0.00230707	22.5	0.637202	-1.93673	0.667409	-0.0623909	0.31929
28S-386	A	12	16575	0.000723982	4	8223	0.00048644	8	1.48833	-1.6183	0.748578	0.0126911	0.301458
28S-387	A	4	15864	0.000252143	7	7225	0.000968858	5.5	0.260248	-0.501528	1.30534	-0.070077	0.170181
28S-388	A	12	15035	0.000798138	6	6318	0.000949668	9	0.840439	-134.663	0.0144475	-0.0172746	0.398901
28S-389	G	14	14618	0.000957723	3	5873	0.000510812	8.5	1.8749	-0.893669	1.03503	0.032698	0.233499
28S-390	U	14	14300	0.000979021	7	5662	0.00123631	10.5	0.791888	-17.2907	0.107158	-0.0231404	0.396658
28S-391	U	14	13590	0.00103017	8	4603	0.001738	11	0.592734	-2.5079	0.558739	-0.0583326	0.341286
28S-392	G	46	13696	0.00335864	8	4600	0.00173913	27	1.93122	-0.059246	1.85037	0.160236	0.0720152
28S-393	A	12	13564	0.000884695	7	4677	0.00149669	9.5	0.591102	-2.73614	0.524606	-0.0527558	0.347655
28S-394	A	18	13774	0.00130681	73	4802	0.015202	45.5	0.085963	0.692704	6.37823	-1.10573	5.84761e-10
28S-395	A	9	14069	0.000639704	5	4924	0.00101543	7	0.629981	-4.278	0.371353	-0.0373957	0.372362
28S-396	A	16	14391	0.00111181	11	5028	0.00218775	13.5	0.508196	-1.20309	0.889659	-0.0865216	0.268559
28S-397	G	19	14861	0.00127851	2	5192	0.000385208	10.5	3.31902	-0.0805361	1.81391	0.0728358	0.0769899
28S-398	A	9	14901	0.000603986	4	5049	0.000792236	6.5	0.762382	-14.3641	0.12757	-0.022956	0.395709
28S-399	A	8	15470	0.00051713	4	5259	0.000760601	6	0.679897	-6.70825	0.254273	-0.0285903	0.386252
28S-400	C	20	16236	0.00123183	14	5556	0.0025198	17	0.488861	-0.829985	1.07105	-0.101722	0.224808
28S-401	U	21	16502	0.00127257	10	5696	0.00175562	15.5	0.724858	-5.73855	0.290864	-0.0369741	0.382419
28S-402	C	20	16847	0.00118715	12	6019	0.00199369	16	0.595457	-1.92437	0.670231	-0.0639748	0.318688
28S-403	U	8	16717	0.000478555	7	6313	0.00110882	7.5	0.431588	-1.22345	0.881512	-0.0599738	0.270503
28S-404	G	39	17140	0.00227538	10	6675	0.00149813	24.5	1.51882	-0.497121	1.30918	0.0777237	0.169329
28S-405	A	18	17508	0.0010281	10	7177	0.00139334	14	0.737868	-6.80554	0.251104	-0.03105	0.386561
28S-406	A	17	17902	0.000949615	7	7359	0.000951216	12	0.998316	-6.38783	0.265301	-0.00317342	0.385147
28S-407	G	19	18750	0.00101333	19	7799	0.00243621	19	0.415947	-0.313536	1.49215	-0.115577	0.131047
28S-408	A	9	18920	0.000475687	8	7901	0.00101253	8.5	0.4698	-1.36114	0.830106	-0.0525664	0.28267
28S-409	G	21	19532	0.00107516	8	8266	0.00096782	14.5	1.11091	-3.05959	0.482807	0.00729231	0.355052
28S-410	A	107	19581	0.00546448	50	8364	0.005978	78.5	0.914098	-5.27076	0.312562	0.0200563	0.379923
28S-411	G	16	20312	0.000787712	10	8690	0.00115075	13	0.684521	-4.23993	0.374051	-0.0342843	0.371987
28S-412	A	18	20310	0.000886263	17	8780	0.00193622	17.5	0.457729	-0.572061	1.24677	-0.0876491	0.183387
28S-413	G	16	20716	0.00077235	10	8924	0.00112057	13	0.689245	-4.4094	0.362332	-0.0333213	0.373596
28S-414	U	18	21058	0.000854782	12	9076	0.00132217	15	0.6465	-2.84788	0.509372	-0.0416519	0.350404
28S-415	U	26	22511	0.00115499	14	10000	0.0014	20	0.824993	-30.7985	0.0616382	-0.0196652	0.398185
28S-416	A	17	24531	0.000693001	9	10876	0.00082751	13	0.837453	-81.8579	0.023655	-0.017409	0.398831
28S-417	A	13	27218	0.000477625	14	14164	0.000988421	13.5	0.48322	-0.934178	1.01335	-0.0504624	0.238741
28S-418	A	42	29133	0.00144166	19	14913	0.00127406	30.5	1.13155	-1.56174	0.765104	0.0172958	0.297711
28S-419	C	118	31554	0.00373962	73	15698	0.00465027	95.5	0.804172	-6.58943	0.258254	-0.0360702	0.385858
28S-420	A	50	32822	0.00152337	70	16160	0.00433168	60	0.35168	0.404026	3.28874	-0.218792	0.00178769
28S-421	U	24	35489	0.000676266	13	19999	0.000650033	18.5	1.04036	-3.58568	0.427418	-0.00483166	0.364116
28S-422	U	12	37235	0.000322277	13	21453	0.000605976	12.5	0.531832	-1.40417	0.815251	-0.0345612	0.286145
28S-423	G	111	39588	0.00280388	30	23689	0.00126641	70.5	2.21404	0.475724	3.73849	0.145826	0.000368125
28S-424	C	273	40810	0.00668954	201	26373	0.00762143	237	0.877727	-6.69696	0.254646	0.00407936	0.386215
28S-425	G	311	42467	0.00732333	213	27277	0.00780878	262	0.937834	-1.45543	0.798232	0.0486614	0.290101
28S-426	U	64	42684	0.00149939	52	27733	0.00187502	58	0.799666	-7.65695	0.226408	-0.0251936	0.388847
28S-427	G	283	44543	0.00635341	145	28257	0.00513147	214	1.23813	0.274267	2.70072	0.17102	0.0104007
28S-428	A	49	45002	0.00108884	31	28204	0.00109913	40	0.990634	-3.06705	0.481922	-0.00189158	0.355204
28S-429	A	22	47436	0.000463783	12	28769	0.000417116	17	1.11188	-2.59399	0.545355	-0.00621659	0.343817
28S-430	A	55	50753	0.00108368	43	29523	0.00145649	49	0.744034	-3.29279	0.456579	-0.0308654	0.359453
28S-431	U	30	54564	0.000549813	27	30927	0.000873024	28.5	0.62978	-1.48934	0.787359	-0.0344837	0.292613
28S-432	C	102	57219	0.00178262	112	32050	0.00349454	107	0.510117	0.243802	2.59191	-0.127707	0.0138711
28S-433	C	99	58057	0.00170522	73	32394	0.0022535	86	0.756698	-2.72678	0.525923	-0.0360382	0.347415
28S-434	U	61	59084	0.00103243	41	33010	0.00124205	51	0.831231	-25.436	0.0741412	-0.0185824	0.397847
28S-435	C	202	61318	0.0032943	165	34178	0.00482767	183.5	0.68238	-0.342614	1.45984	-0.0920308	0.137449
28S-436	C	211	62874	0.00335592	201	35202	0.0057099	206	0.587736	0.247095	2.60325	-0.156578	0.0134686
28S-437	A	115	64016	0.00179643	71	35668	0.00199058	93	0.902464	-5.77262	0.289401	-0.00651254	0.382581
28S-438	G	104	65203	0.00159502	49	36317	0.00134923	76.5	1.18217	-0.39522	1.4048	0.0257037	0.148724
28S-439	G	93	65417	0.00142165	65	36358	0.00178778	79	0.795205	-5.84705	0.286255	-0.0255387	0.382928
28S-440	G	76	65968	0.00115207	33	36503	0.000904035	54.5	1.27437	-0.354363	1.44718	0.0196002	0.140002
28S-441	G	298	66191	0.00450212	152	36455	0.00416952	225	1.07977	-0.115862	1.75649	0.0738601	0.0853012
28S-442	U	129	66914	0.00192785	42	36723	0.0011437	85.5	1.68563	0.34546	2.99447	0.0733441	0.00450595
28S-443	U	34	70286	0.000483738	33	38328	0.000860989	33.5	0.56184	-0.666635	1.17602	-0.0397292	0.199797
28S-444	U	308	73618	0.00418376	480	38470	0.0124773	394	0.335311	0.77923	8.87803	-0.618346	3.05849e-18
28S-445	A	215	78710	0.00273155	152	40396	0.00376275	183.5	0.725944	-0.886081	1.03919	-0.0599797	0.232492
28S-446	A	75	83423	0.000899033	50	43062	0.00116112	62.5	0.774283	-4.49835	0.35647	-0.0246571	0.374384
28S-447	A	61	89045	0.000685047	36	45591	0.00078963	48.5	0.867555	-25.6102	0.0736561	-0.015136	0.397862
28S-448	A	195	94959	0.00205352	99	48750	0.00203077	147	1.0112	-0.90547	1.02862	0.0144261	0.235048
28S-449	C	230	100730	0.00228333	199	52143	0.00381643	214.5	0.59829	0.220956	2.5159	-0.106349	0.0168429
28S-450	G	214	103946	0.00205876	158	54037	0.00292392	186	0.704109	-0.565256	1.25219	-0.0562856	0.182149
28S-451	G	175	105289	0.00166209	112	54774	0.00204477	143.5	0.812852	-6.69159	0.254824	-0.0234472	0.386198
28S-452	A	90	109029	0.000825468	54	56968	0.000947901	72	0.870839	-17.5657	0.105571	-0.0145672	0.396725
28S-453	A	83	115604	0.000717968	72	60773	0.00118474	77.5	0.606015	-0.343869	1.45848	-0.0435433	0.137723
28S-454	G	112	122594	0.000913585	82	66182	0.00123901	97	0.737352	-1.87019	0.682882	-0.0295002	0.315972
28S-455	G	97	124910	0.000776559	67	68100	0.000983847	82	0.789309	-5.042	0.324396	-0.0220259	0.378494
28S-456	A	329	127373	0.00258296	198	69818	0.00283594	263.5	0.910795	-2.50351	0.559439	-4.56429e-05	0.341153
28S-457	C	322	133031	0.00242049	289	73929	0.00390916	305.5	0.619184	0.27966	2.72094	-0.100862	0.00984606
28S-458	U	182	136532	0.00133302	167	76875	0.00217236	174.5	0.613629	0.0739918	2.11661	-0.0645211	0.0424698
28S-459	U	188	148024	0.00127006	161	93739	0.00171753	174.5	0.739469	-1.1633	0.906023	-0.0341736	0.264642
28S-460	U	431	161012	0.00267682	484	113542	0.00426274	457.5	0.627957	0.389489	3.21043	-0.104979	0.00230574
28S-461	C	1266	180494	0.00701408	1077	154219	0.00698358	1171.5	1.00437	0.317777	2.87296	0.0854077	0.00643569
28S-462	G	916	187857	0.00487605	747	168028	0.00444569	831.5	1.0968	0.46779	3.68276	0.086958	0.0004527
28S-463	A	189	193226	0.000978129	196	175631	0.00111598	192.5	0.876479	-7.85712	0.221291	-0.0136307	0.389293
28S-464	A	165	200715	0.000822061	148	183288	0.000807472	156.5	1.01807	-0.727326	1.1347	-0.00369197	0.209567
28S-465	G	269	210578	0.00127744	294	193642	0.00151827	281.5	0.841379	-25.0924	0.0751175	-0.0175952	0.397818
28S-466	U	278	216245	0.00128558	336	199501	0.0016842	307	0.763316	-1.10785	0.929859	-0.0300594	0.258914
28S-467	U	171	229091	0.000746428	311	214139	0.00145233	241	0.513953	0.488393	3.83107	-0.0622036	0.000259314
28S-468	C	1247	241500	0.00516356	1347	227967	0.00590875	1297	0.873884	-2.76382	0.520748	-0.00268124	0.348357
28S-469	G	777	247902	0.0031343	766	243211	0.00314953	771.5	0.995166	0.110242	2.20285	0.0267291	0.0352531
28S-470	A	545	253294	0.00215165	509	250094	0.00203523	527	1.0572	0.219622	2.5116	0.0232853	0.017026
28S-471	G	1159	261600	0.00443043	1196	257878	0.00463785	1177.5	0.955276	0.0302162	2.02107	0.0297914	0.0517517
28S-472	C	2741	267001	0.0102659	3058	262938	0.0116301	2899.5	0.882698	-0.870883	1.04763	0.0203404	0.230453
28S-473	C	516	273254	0.00188835	829	268541	0.00308705	672.5	0.611701	0.533947	4.20553	-0.0852931	5.75897e-05
28S-474	A	577	278072	0.002075	584	273584	0.00213463	580.5	0.972067	-0.203509	1.62857	0.0081638	0.105921
28S-475	U	1141	288680	0.00395247	1497	291007	0.00514421	1319	0.768335	-0.0864818	1.80399	-0.0554593	0.0783848
28S-476	C	1019	297088	0.00342996	1485	297132	0.00499778	1252	0.686297	0.475465	3.73664	-0.0928532	0.000370675
28S-477	U	1463	300916	0.00486182	1458	301267	0.00483956	1460.5	1.0046	0.389291	3.20938	0.0542215	0.00231347
28S-478	U	321	322398	0.000995664	537	336970	0.00159361	429	0.624784	0.374782	3.13491	-0.0500624	0.00292997
28S-479	C	2954	343076	0.00861034	3575	370068	0.00966039	3264.5	0.891304	-0.41602	1.38416	0.0219053	0.153065
28S-480	G	908	352330	0.00257713	1225	388118	0.00315626	1066.5	0.816515	-2.10299	0.631648	-0.0261296	0.326793
28S-481	G	852	358780	0.00237471	1201	396458	0.00302932	1026.5	0.783909	-0.547482	1.26657	-0.0350184	0.178879
28S-482	G	1175	364119	0.00322697	1478	400627	0.00368922	1326.5	0.874702	-2.62302	0.540986	-0.00759429	0.344634
28S-483	A	614	370279	0.00165821	590	403152	0.00146347	602	1.13307	0.443439	3.52163	0.0225305	0.000808869
28S-484	U	166	382066	0.00043448	272	409836	0.00066368	219	0.654653	-0.031817	1.89956	-0.028625	0.0656705
28S-485	C	1191	401011	0.00296999	1536	419576	0.00366084	1363.5	0.811288	-1.3506	0.833828	-0.0294634	0.281796
28S-486	A	770	407475	0.00188969	922	421795	0.0021859	846	0.864491	-6.45607	0.262873	-0.0133258	0.385394
28S-487	G	592	419851	0.00141002	641	435391	0.00147224	616.5	0.957741	-0.313302	1.49242	-0.00147506	0.130995
28S-488	U	347	426378	0.000813832	403	438298	0.000919466	375	0.885114	-3.86741	0.402679	-0.0133931	0.367874
28S-489	G	488	440502	0.00110783	633	444510	0.00142404	560.5	0.777947	-0.90352	1.02967	-0.0260108	0.234793
28S-490	U	448	444626	0.00100759	547	446932	0.0012239	497.5	0.823261	-4.73667	0.341662	-0.0194682	0.376324
28S-491	C	5264	464505	0.0113325	5548	459295	0.0120794	5406	0.938168	0.465532	3.6672	0.0846862	0.000479337
28S-492	G	1521	469886	0.00323696	1522	462351	0.00329187	1521.5	0.983318	0.314789	2.86043	0.0250209	0.00667106
28S-493	U	399	473991	0.000841788	416	467577	0.000889693	407.5	0.946156	-0.794376	1.0923	-0.00839428	0.219698
28S-494	G	823	503812	0.00163355	1192	488242	0.00244141	1007.5	0.669099	0.477858	3.75377	-0.0577494	0.000347642
28S-495	G	928	510000	0.00181961	1111	490975	0.00226284	1019.5	0.804124	-1.26778	0.864281	-0.0260411	0.274603
28S-496	G	1057	519565	0.00203439	1338	497276	0.00269066	1197.5	0.756095	0.0192186	1.99841	-0.0399775	0.0541632
28S-497	U	1601	529118	0.00302579	1646	503740	0.00326756	1623.5	0.926009	-0.12089	1.74861	0.00712938	0.0864872
28S-498	A	688	550120	0.00125064	745	513665	0.00145036	716.5	0.862293	-8.39913	0.20853	-0.0146984	0.390362
28S-499	G	716	553137	0.00129444	740	509947	0.00145113	728	0.892018	-1.93747	0.667241	-0.0106468	0.319326
28S-500	C	2659	559877	0.00474926	2872	514335	0.00558391	2765.5	0.850526	-39.2623	0.0486808	-0.0156901	0.39847
28S-501	G	3008	570187	0.00527546	2702	519091	0.00520525	2855	1.01349	0.585322	4.72656	0.0639113	5.62027e-06
28S-502	A	404	570855	0.00070771	423	516520	0.000818942	413.5	0.864176	-9.8489	0.180664	-0.0153447	0.392485
28S-503	G	554	576579	0.00096084	619	518512	0.0011938	586.5	0.804858	-2.03676	0.645425	-0.0214587	0.323931
28S-504	U	451	575560	0.000783585	616	517941	0.00118932	533.5	0.658848	0.327474	2.91439	-0.0377472	0.00570873
28S-505	G	605	578616	0.0010456	658	513810	0.00128063	631.5	0.816473	-3.00039	0.489952	-0.0204214	0.353821
28S-506	C	3595	578527	0.00621406	3494	510128	0.00684926	3544.5	0.907259	0.00858192	1.97697	0.0209877	0.0565214
28S-507	U	977	580326	0.00168354	858	507962	0.0016891	917.5	0.996705	0.192536	2.42735	0.0069208	0.0209638
28S-508	G	2704	591153	0.00457411	2226	512740	0.00434138	2465	1.05361	0.633627	5.34973	0.0669196	2.43351e-07
28S-509	A	345	596528	0.000578347	308	515734	0.000597207	326.5	0.968419	-0.649003	1.1886	-0.00981556	0.196849
28S-510	U	386	601846	0.00064136	402	518343	0.000775548	394	0.826976	-6.53084	0.260263	-0.0181159	0.385657
28S-511	G	1199	608723	0.0019697	1201	519886	0.00231012	1200	0.852638	-25.1168	0.0750476	-0.0157158	0.39782
28S-512	U	743	606884	0.00122429	683	516721	0.0013218	713	0.926229	-0.685734	1.1627	-0.00692335	0.202934
28S-513	G	1037	617237	0.00168007	975	521266	0.00187045	1006	0.898218	-1.19133	0.894432	-0.00786203	0.267418
28S-514	A	517	613507	0.000842696	511	513257	0.000995603	514	0.846418	-56.8598	0.033875	-0.0167523	0.398713
28S-515	U	490	615197	0.000796493	383	511844	0.000748275	436.5	1.06444	0.168058	2.35593	-0.00137365	0.0248686
28S-516	G	1100	614667	0.00178959	1168	506430	0.00230634	1134	0.775942	-0.294943	1.51358	-0.0323279	0.126894
28S-517	G	1153	606642	0.00190063	1190	494027	0.00240878	1171.5	0.789043	-0.565392	1.25208	-0.0300668	0.182174
28S-518	G	2675	606519	0.00441041	2245	489855	0.00458299	2460	0.962345	0.368682	3.10461	0.0322858	0.00322039
28S-519	U	1022	604089	0.0016918	880	486012	0.00181065	951	0.93436	-0.327466	1.4765	-0.00199326	0.134128
28S-520	U	720	598459	0.00120309	874	476362	0.00183474	797	0.655728	0.460824	3.63518	-0.0498067	0.000538783
28S-521	G	1202	592128	0.00202997	1133	466791	0.00242721	1167.5	0.836337	-6.66714	0.255636	-0.0193907	0.386118
28S-522	A	1190	586019	0.00203065	1051	462976	0.0022701	1120.5	0.894522	-1.24159	0.874379	-0.0068009	0.272203
28S-523	G	1864	585511	0.00318354	1845	462363	0.00399037	1854.5	0.797806	-0.465576	1.33736	-0.0356807	0.163131
28S-524	G	1261	582814	0.00216364	1074	459926	0.00233516	1167.5	0.92655	-0.313354	1.49236	0.000500806	0.131006
28S-525	G	3645	578296	0.006303	2900	452588	0.00640759	3272.5	0.983677	0.53362	4.20258	0.0645508	5.83068e-05
28S-526	C	2451	576275	0.00425318	2018	448175	0.00450271	2234.5	0.944583	0.22163	2.51808	0.0239206	0.0167508
28S-527	A	513	560698	0.000914931	489	426332	0.00114699	501	0.797678	-1.8138	0.696567	-0.0220382	0.313003
28S-528	G	643	560658	0.00114687	524	423936	0.00123604	583.5	0.927859	-0.830098	1.07098	-0.00735656	0.224824
28S-529	C	1934	564445	0.00342637	1573	427573	0.0036789	1753.5	0.931357	-0.0128301	1.93517	0.0119536	0.0613363
28S-530	C	2032	561890	0.00361637	1627	423413	0.00384258	1829.5	0.941129	0.108536	2.19863	0.0167461	0.0355815
28S-531	U	565	560988	0.00100715	556	423488	0.00131291	560.5	0.767116	-0.63526	1.19859	-0.026605	0.194516
28S-532	C	3346	564806	0.00592416	2684	429344	0.0062514	3015	0.947653	0.349272	3.01201	0.0414272	0.00427467
28S-533	G	1611	567151	0.00284051	971	432459	0.0022453	1291	1.26509	0.723229	7.08166	0.0712274	5.14037e-12
28S-534	G	2305	566651	0.00406776	1871	432450	0.00432651	2088	0.940194	0.157726	2.32703	0.0205552	0.0266097
28S-535	C	3155	567866	0.00555589	2565	432734	0.00592743	2860	0.937318	0.258074	2.64177	0.0326717	0.0121744
28S-536	U	513	567692	0.000903659	444	433356	0.00102456	478.5	0.881996	-3.69952	0.417064	-0.0133362	0.365712
28S-537	G	795	570010	0.00139471	631	433247	0.00145644	713	0.957615	-0.222199	1.60367	-0.00165364	0.110271
28S-538	U	2287	570714	0.00400726	1882	434637	0.00433005	2084.5	0.925454	0.00283836	1.96558	0.0145919	0.0578045
28S-539	U	301	571936	0.000526283	327	436040	0.000749931	314	0.701775	-0.16389	1.68401	-0.0268802	0.0966286
28S-540	C	2094	580144	0.00360945	2071	440030	0.0047065	2082.5	0.766908	0.153967	2.3167	-0.0527765	0.0272561
28S-541	U	1541	581380	0.00265059	1797	444660	0.00404129	1669	0.655877	0.627088	5.25593	-0.0897879	4.00185e-07
28S-542	C	1997	599726	0.00332985	1927	458203	0.00420556	1962	0.791774	-0.270302	1.54294	-0.0390964	0.121327
28S-543	U	754	598753	0.00125928	643	466465	0.00137845	698.5	0.913549	-1.02528	0.967767	-0.00815365	0.249767
28S-544	G	1004	611626	0.00164153	1109	477390	0.00232305	1056.5	0.706626	0.341821	2.97791	-0.0475638	0.00473427
28S-545	G	1158	615764	0.00188059	1012	481597	0.00210134	1085	0.894947	-1.25785	0.868082	-0.00743912	0.2737
28S-546	U	1004	617765	0.00162521	1019	481562	0.00211603	1011.5	0.768048	-0.231531	1.59152	-0.0325917	0.112433
28S-547	C	1757	626037	0.00280654	2123	483070	0.00439481	1940	0.638604	0.686357	6.24915	-0.103326	1.32103e-09
28S-548	A	328	622834	0.000526625	270	478749	0.00056397	299	0.933782	-1.38499	0.821805	-0.0120228	0.284614
28S-549	U	528	612235	0.000862414	440	481338	0.000914119	484	0.943438	-0.691238	1.15891	-0.00840463	0.203828
28S-550	G	683	611021	0.0011178	732	475460	0.00153956	707.5	0.726052	0.0565237	2.07742	-0.0342837	0.0461073
28S-551	U	938	599597	0.00156438	825	466613	0.00176806	881.5	0.884802	-2.19532	0.613397	-0.0105631	0.330527
28S-552	U	608	588095	0.00103385	684	462326	0.00147948	646	0.698793	0.206384	2.46971	-0.0373774	0.0188987
28S-553	G	895	581882	0.00153811	975	456513	0.00213576	935	0.720173	0.219814	2.51222	-0.0423436	0.0169996
28S-554	G	1479	568455	0.00260179	1282	448287	0.00285978	1380.5	0.909788	-0.526051	1.28436	-0.000177734	0.174867
28S-555	U	955	567174	0.00168379	876	445129	0.00196797	915.5	0.855596	-15.6273	0.117878	-0.0152875	0.39618
28S-556	C	2174	562388	0.00386566	2494	435677	0.00572442	2334	0.675292	0.644673	5.51605	-0.109868	9.8586e-08
28S-557	A	799	543410	0.00147034	818	418184	0.00195608	808.5	0.75168	-0.133944	1.72848	-0.0343831	0.0895678
28S-558	U	2838	532364	0.00533094	2630	414851	0.00633963	2734	0.840892	-6.86435	0.249226	-0.0213137	0.386743
28S-559	C	5096	530792	0.00960075	5382	410569	0.0131086	5239	0.732399	0.632869	5.33869	-0.159991	2.58145e-07
28S-560	U	837	512377	0.00163356	823	403845	0.00203791	830	0.801587	-1.37113	0.82661	-0.0255798	0.283489
28S-561	G	1262	523571	0.00241037	1045	418811	0.00249516	1153.5	0.966019	0.105034	2.19003	0.0109148	0.0362597
28S-562	C	3963	524254	0.00755931	4009	421840	0.0095036	3986	0.795415	0.0465342	2.05566	-0.0642937	0.0482285
28S-563	G	1518	525003	0.00289141	1581	422637	0.0037408	1549.5	0.77294	-0.0620916	1.84542	-0.0432173	0.072678
28S-564	U	419	518002	0.000808877	377	419786	0.000898077	398	0.900677	-2.32405	0.589641	-0.0121532	0.335284
28S-565	U	420	516399	0.000813325	601	420196	0.00143028	510.5	0.568645	0.563842	4.49378	-0.0541643	1.64371e-05
28S-566	G	891	518001	0.00172007	798	420447	0.00189798	844.5	0.906266	-1.06599	0.948696	-0.00630024	0.254374
28S-567	C	1488	519647	0.00286348	1999	425652	0.00469632	1743.5	0.609728	0.714923	6.87534	-0.122017	2.16914e-11
28S-568	U	461	518070	0.000889841	402	424174	0.000947724	431.5	0.938924	-0.875024	1.04532	-0.00850816	0.231012
28S-569	U	1037	527200	0.001967	1410	431232	0.0032697	1223.5	0.601583	0.672845	5.99104	-0.0924693	6.41132e-09
28S-570	A	569	538516	0.00105661	573	444632	0.00128871	571	0.819898	-3.71134	0.416018	-0.0200315	0.365871
28S-571	C	7782	543410	0.0143207	7627	454613	0.0167769	7704.5	0.853595	-7.18784	0.23938	-0.0092002	0.387674
28S-572	G	1005	541282	0.0018567	1029	453269	0.00227018	1017	0.817868	-2.29555	0.594742	-0.023142	0.334273
28S-573	G	1445	536346	0.00269416	1322	451198	0.00292998	1383.5	0.919514	-0.320454	1.48434	0.00289948	0.13258
28S-574	C	2632	535818	0.00491212	2836	451345	0.00628344	2734	0.781756	0.0905408	2.15513	-0.0561648	0.039116
28S-575	G	4316	534191	0.00807951	3629	449599	0.00807164	3972.5	1.00098	0.62187	5.1834	0.0987153	5.84363e-07
28S-576	U	646	527477	0.0012247	580	445771	0.00130112	613	0.941267	-0.534709	1.27711	-0.00523608	0.176497
28S-577	G	808	530491	0.00152312	845	444754	0.00189993	826.5	0.801672	-1.37985	0.823582	-0.024951	0.284198
28S-578	U	562	526477	0.00106747	554	439739	0.00125984	558	0.84731	-84.7274	0.0228632	-0.0167097	0.398838
28S-579	A	362	528558	0.000684882	494	435701	0.00113381	428	0.604056	0.440203	3.50127	-0.0425899	0.000868815
28S-580	U	1918	520760	0.00368308	1553	426438	0.0036418	1735.5	1.01134	0.46125	3.63805	0.0390181	0.000533189
28S-581	U	338	515325	0.000655897	518	422116	0.00122715	428	0.534487	0.586308	4.73782	-0.0527536	5.32857e-06
28S-582	C	2964	511868	0.00579056	3186	414810	0.00768062	3075	0.753917	0.404202	3.28971	-0.08506	0.00178199
28S-583	C	2347	512826	0.0045766	2392	419660	0.00569985	2369.5	0.802933	-0.445225	1.35619	-0.0411469	0.159046
28S-584	C	2129	514929	0.00413455	2313	420313	0.00550304	2221	0.751321	0.318728	2.87697	-0.0669682	0.00636197
28S-585	G	1453	513160	0.00283148	1620	419446	0.00386224	1536.5	0.733118	0.317665	2.87249	-0.0585271	0.00644444
28S-586	G	1469	509381	0.00288389	1468	417151	0.00351911	1468.5	0.819495	-1.89702	0.676556	-0.0262499	0.317333
28S-587	G	1609	507335	0.00317147	1667	414527	0.00402145	1638	0.788639	-0.314649	1.49089	-0.0392918	0.131294
28S-588	U	383	493306	0.000776394	387	405877	0.000953491	385	0.814265	-3.78959	0.409221	-0.0196213	0.366899
28S-589	G	469	486497	0.000964035	543	392148	0.00138468	506	0.696214	0.119945	2.22713	-0.036376	0.0334066
28S-590	G	708	482128	0.00146849	585	384543	0.00152129	646.5	0.965295	-0.20248	1.62996	0.000105168	0.105681
28S-591	A	689	479734	0.00143621	570	379557	0.00150175	629.5	0.956359	-0.313749	1.49191	-0.00136845	0.131094
28S-592	U	530	477068	0.00111095	437	373676	0.00116946	483.5	0.949969	-0.588585	1.2338	-0.00542175	0.18636
28S-593	U	435	467550	0.000930382	398	362369	0.00109833	416.5	0.847089	-86.5375	0.0223904	-0.0167076	0.398842
28S-594	C	3694	462066	0.00799453	3839	352228	0.0108992	3766.5	0.733498	0.562515	4.48015	-0.134683	1.74737e-05
28S-595	G	1901	458403	0.00414701	1520	356923	0.00425862	1710.5	0.973791	0.307472	2.83021	0.0334093	0.00727014
28S-596	U	576	456400	0.00126205	529	356006	0.00148593	552.5	0.849334	-369.429	0.00529116	-0.0164621	0.398937
28S-597	A	304	454934	0.000668229	231	349617	0.000660723	267.5	1.01136	-0.374129	1.42636	-0.00643866	0.144253
28S-598	A	219	438467	0.000499467	162	326884	0.000495589	190.5	1.00783	-0.663021	1.17858	-0.0091216	0.199197
28S-599	U	284	436587	0.0006505	280	324434	0.000863041	282	0.75373	-0.964918	0.997497	-0.0242327	0.242576
28S-600	C	1682	429139	0.00391948	1449	316414	0.00457944	1565.5	0.855885	-11.2041	0.160602	-0.0135339	0.39383
28S-601	C	1179	425211	0.00277274	1213	312743	0.00387858	1196	0.714885	0.339262	2.96638	-0.0653458	0.00489942
28S-602	G	2943	425588	0.00691514	2234	314113	0.00711209	2588.5	0.972307	0.429835	3.4376	0.0658706	0.00108358
28S-603	C	1152	421062	0.00273594	962	307221	0.0031313	1057	0.87374	-3.19965	0.466706	-0.00922641	0.357777
28S-604	A	373	423657	0.000880429	346	308596	0.00112121	359.5	0.785251	-1.65534	0.738136	-0.0232224	0.303808
28S-605	C	1933	420637	0.00459541	1681	305954	0.00549429	1807	0.836398	-5.20297	0.315978	-0.0229926	0.379516
28S-606	G	604	425119	0.00142078	486	310566	0.00156488	545	0.907913	-1.50818	0.781444	-0.00785098	0.293974
28S-607	C	2777	422627	0.00657081	2966	308612	0.00961077	2871.5	0.683692	0.661249	5.78596	-0.165665	2.14487e-08
28S-608	G	737	421197	0.00174978	647	306624	0.00211008	692	0.829247	-5.35838	0.308255	-0.0204199	0.380432
28S-609	G	2902	420210	0.00690607	2414	305604	0.00789911	2658	0.874285	-1.59251	0.756025	0.00227606	0.299774
28S-610	C	1734	420558	0.00412309	1737	306130	0.00567406	1735.5	0.726657	0.393864	3.2336	-0.081678	0.00213984
28S-611	U	1090	405865	0.00268562	825	302791	0.00272465	957.5	0.985675	0.148303	2.30129	0.0184671	0.0282432
28S-612	G	760	403724	0.00188247	858	298240	0.00287688	809	0.654346	0.469038	3.69141	-0.0690896	0.000438479
28S-613	G	825	402553	0.00204942	761	296557	0.00256612	793	0.798646	-1.28239	0.858748	-0.0286378	0.275915
28S-614	A	529	400200	0.00132184	388	291662	0.00133031	458.5	0.993635	-0.169099	1.67651	0.00155899	0.0978545
28S-615	A	654	394149	0.00165927	470	280908	0.00167315	562	0.991707	-0.0700674	1.83166	0.00591424	0.0745393
28S-616	C	2883	394094	0.00731551	2358	277380	0.00850097	2620.5	0.86055	-4.66265	0.346128	-0.0072563	0.375746
28S-617	G	955	381059	0.00250617	900	267707	0.00336188	927.5	0.745467	0.00714227	1.9741	-0.0491859	0.0568424
28S-618	G	705	371255	0.00189896	628	259632	0.00241881	666.5	0.785083	-0.946989	1.00668	-0.0310228	0.240354
28S-619	U	525	359310	0.00146113	373	255663	0.00145895	449	1.0015	-0.126396	1.74006	0.00438384	0.0877864
28S-620	G	627	350209	0.00179036	468	242485	0.00193002	547.5	0.92764	-0.900245	1.03145	-0.00225396	0.234364
28S-621	U	444	338874	0.00131022	325	232418	0.00139834	384.5	0.936982	-1.03856	0.961465	-0.00495593	0.25129
28S-622	C	530	332008	0.00159635	509	220313	0.00231035	519.5	0.690955	0.160875	2.33577	-0.050794	0.0260733
28S-623	A	534	304137	0.00175579	223	188851	0.00118083	378.5	1.48692	0.627656	5.26395	0.0542266	3.83665e-07
28S-624	A	346	288933	0.00119751	217	174007	0.00124708	281.5	0.960254	-0.923935	1.01875	-0.00348105	0.237435
28S-625	A	635	279909	0.00226859	402	165874	0.00242353	518.5	0.936072	-0.788307	1.09601	0.00331178	0.218809
28S-626	G	516	272994	0.00189015	393	160012	0.00245607	454.5	0.769585	-0.894226	1.03472	-0.0348206	0.233572
28S-627	G	297	263866	0.00112557	197	153205	0.00128586	247	0.875346	-7.26326	0.237195	-0.0133283	0.387876
28S-628	A	332	257490	0.00128937	205	148643	0.00137914	268.5	0.934907	-1.52203	0.777152	-0.00538337	0.294958
28S-629	C	638	248795	0.00256436	459	141134	0.00325223	548.5	0.788493	-1.29665	0.853417	-0.0349798	0.277177
28S-630	C	695	247555	0.00280746	496	141027	0.00351706	595.5	0.79824	-1.64361	0.741411	-0.0332641	0.303072
28S-631	C	543	242784	0.00223656	392	139505	0.00280994	467.5	0.795946	-1.84857	0.688065	-0.0305022	0.314851
28S-632	A	256	242428	0.00105598	160	141653	0.00112952	208	0.934895	-1.86316	0.684558	-0.00739948	0.31561
28S-633	G	249	238871	0.0010424	169	142407	0.00118674	209	0.878376	-7.0578	0.243243	-0.0132363	0.387313
28S-634	U	196	229492	0.00085406	136	141757	0.000959388	166	0.890213	-5.47841	0.302543	-0.0127981	0.381096
28S-635	G	295	227561	0.00129636	222	139681	0.00158934	258.5	0.815659	-5.1502	0.318689	-0.0214844	0.379189
28S-636	C	1219	225433	0.00540737	1084	136797	0.00792415	1151.5	0.682391	0.466579	3.6744	-0.140458	0.000466831
28S-637	U	267	217966	0.00122496	296	133274	0.00222099	281.5	0.551539	0.45237	3.57906	-0.0785455	0.000659671
28S-638	U	218	218571	0.000997388	191	136862	0.00139557	204.5	0.714683	-0.603293	1.22248	-0.0341118	0.188969
28S-639	U	154	220879	0.000697214	120	146292	0.000820277	137	0.849974	-278.832	0.00700419	-0.0164367	0.398932
28S-640	U	485	219827	0.00220628	685	155516	0.00440469	585	0.500893	0.689261	6.30755	-0.160483	9.15495e-10
28S-641	G	300	222025	0.0013512	314	162064	0.00193751	307	0.697391	-0.140264	1.7189	-0.0440911	0.0910591
28S-642	U	239	217839	0.00109714	202	162867	0.00124028	220.5	0.884594	-5.43122	0.304763	-0.0123642	0.380839
28S-643	U	190	210365	0.000903192	177	160374	0.00110367	183.5	0.818353	-6.89048	0.248401	-0.0196868	0.386822
28S-644	G	278	205269	0.00135432	228	157392	0.00144861	253	0.934909	-1.56056	0.765458	-0.00482236	0.297631
28S-645	C	469	202512	0.00231591	364	154708	0.00235282	416.5	0.984314	-0.302425	1.50488	0.0133921	0.128571
28S-646	U	238	197667	0.00120405	201	152854	0.00131498	219.5	0.915637	-2.50441	0.559294	-0.00828076	0.34118
28S-647	U	150	198026	0.000757476	143	153157	0.000933682	146.5	0.811278	-6.13978	0.274518	-0.0198186	0.38419
28S-648	C	1042	199062	0.00523455	872	154881	0.00563013	957	0.929739	-0.396265	1.40374	0.0261974	0.148943
28S-649	G	354	197531	0.00179212	255	154165	0.00165407	304.5	1.08346	0.0743799	2.1175	0.0199106	0.0423901
28S-650	G	1053	196688	0.00535366	859	153849	0.0055834	956	0.958853	-0.0435561	1.87819	0.0411078	0.0683753
28S-651	C	528	195781	0.00269689	503	152779	0.00329234	515.5	0.819142	-3.83275	0.405566	-0.0257318	0.367445
28S-652	U	563	194443	0.00289545	526	152643	0.00344595	544.5	0.840248	-15.3098	0.120173	-0.0193321	0.396072
28S-653	U	246	193362	0.00127223	204	152456	0.00133809	225	0.950776	-1.31096	0.848132	-0.00372064	0.278426
28S-654	C	655	196593	0.00333176	683	154776	0.00441283	669	0.755016	-0.293345	1.51545	-0.0554417	0.126535
28S-655	A	378	197892	0.00191013	278	158401	0.00175504	328	1.08837	0.124893	2.23973	0.0229431	0.0324801
28S-656	A	610	200216	0.00304671	483	164670	0.00293314	546.5	1.03872	0.166653	2.35196	0.0357545	0.0251022
28S-657	G	319	201460	0.00158344	303	165452	0.00183135	311	0.864632	-11.1473	0.161353	-0.0138188	0.393783
28S-658	A	126	199389	0.000631931	118	163018	0.000723846	122	0.873017	-11.6991	0.154342	-0.0148796	0.394219
28S-659	C	818	199616	0.00409787	840	161592	0.00519828	829	0.788313	-0.837678	1.06656	-0.0461164	0.225888
28S-660	G	420	200235	0.00209754	379	160991	0.00235417	399.5	0.890988	-3.06039	0.482712	-0.00722247	0.355069
28S-661	C	581	198164	0.00293191	529	157813	0.00335207	555	0.874658	-4.58089	0.351199	-0.00842342	0.375083
28S-662	U	485	196094	0.0024733	406	156502	0.00259422	445.5	0.953392	-0.60313	1.22261	0.00892757	0.18894
28S-663	G	441	197332	0.00223481	429	155795	0.00275362	435	0.811591	-3.17782	0.469144	-0.0261762	0.357369
28S-664	G	893	199340	0.00447978	680	157024	0.00433055	786.5	1.03446	0.290287	2.76168	0.0589251	0.0088055
28S-665	A	528	201994	0.00261394	793	158364	0.00500745	660.5	0.52201	0.683078	6.18449	-0.170254	1.97455e-09
28S-666	U	351	204719	0.00171455	270	158922	0.00169895	310.5	1.00918	-0.290908	1.51831	0.00904795	0.125987
28S-667	U	147	203516	0.000722302	177	157678	0.00112254	162	0.643453	-0.114796	1.75817	-0.0381779	0.0850497
28S-668	C	1433	204899	0.00699369	1481	158217	0.00936056	1457	0.747144	0.195321	2.43575	-0.106006	0.0205399
28S-669	C	887	205139	0.0043239	867	161185	0.00537891	877	0.803861	-1.42652	0.807742	-0.0392914	0.287894
28S-670	C	1540	207977	0.00740466	1442	165711	0.0087019	1491	0.850925	-42.7279	0.0448227	-0.0149024	0.398542
28S-671	G	784	210488	0.00372468	673	169712	0.00396554	728.5	0.939261	-0.438262	1.36276	0.0171149	0.157632
28S-672	G	1135	210954	0.00538032	1017	171287	0.0059374	1076	0.906174	-0.83313	1.06921	0.0153895	0.22525
28S-673	C	380	212400	0.00178908	327	172163	0.00189936	353.5	0.941935	-1.00813	0.976032	6.93831e-05	0.247769
28S-674	A	88	215505	0.000408343	88	174220	0.000505108	88	0.808427	-7.54509	0.229372	-0.0184377	0.388585
28S-675	A	111	216674	0.00051229	77	174437	0.00044142	94	1.16055	-0.301438	1.50603	-0.00359902	0.12835
28S-676	C	516	220967	0.00233519	644	177729	0.00362349	580	0.644458	0.407437	3.30767	-0.0860984	0.00167949
28S-677	G	463	223772	0.00206907	448	179863	0.00249078	455.5	0.83069	-7.44852	0.231993	-0.0207868	0.38835
28S-678	A	343	222675	0.00154036	523	178754	0.00292581	433	0.526474	0.601597	4.91965	-0.105117	2.2147e-06
28S-679	U	447	227267	0.00196685	353	182630	0.00193287	400	1.01758	-0.084617	1.80709	0.0140921	0.0779471
28S-680	U	178	232912	0.000764237	186	188656	0.000985921	182	0.77515	-2.19618	0.613232	-0.0233484	0.330561
28S-681	C	1417	236881	0.00598191	1543	191793	0.00804513	1480	0.743544	0.230846	2.54825	-0.0961501	0.0155183
28S-682	G	478	236791	0.00201866	488	193452	0.00252259	483	0.800232	-2.01859	0.64931	-0.0280565	0.323117
28S-683	G	1249	238636	0.00523391	1181	194963	0.00605756	1215	0.86403	-5.38905	0.306775	-0.00793818	0.380605
28S-684	C	1938	238935	0.00811099	1947	194724	0.00999877	1942.5	0.811199	-0.955557	1.00227	-0.0519629	0.241421
28S-685	C	776	238547	0.00325303	916	193528	0.00473317	846	0.687284	0.360815	3.06641	-0.0883728	0.00362334
28S-686	C	932	237224	0.00392878	1118	192958	0.00579401	1025	0.678076	0.454	3.58974	-0.109488	0.000634887
28S-687	G	637	236438	0.00269415	595	193175	0.00308011	616	0.874694	-4.28861	0.370608	-0.00906968	0.372464
28S-688	G	1126	235810	0.00477503	949	193282	0.00490992	1037.5	0.972526	0.103223	2.1856	0.0404617	0.0366123
28S-689	C	786	235152	0.00334252	934	193242	0.00483332	860	0.691558	0.346902	3.00108	-0.0879534	0.00441747
28S-690	U	448	230401	0.00194444	444	191510	0.00231842	446	0.838691	-14.266	0.12839	-0.0187493	0.395668
28S-691	U	298	231227	0.00128878	369	192162	0.00192025	333.5	0.671149	0.0842449	2.14031	-0.0485777	0.0403807
28S-692	C	764	236112	0.00323575	975	197211	0.00494394	869.5	0.654488	0.487313	3.82299	-0.106799	0.000267451
28S-693	U	175	235108	0.000744339	187	198966	0.000939859	181	0.791968	-3.19458	0.46727	-0.0215448	0.357683
28S-694	G	219	237471	0.000922218	231	201496	0.00114642	225	0.804429	-3.85203	0.403954	-0.0213086	0.367685
28S-695	U	176	238756	0.000737154	170	203862	0.000833897	173	0.883987	-6.37027	0.265933	-0.0137719	0.385082
28S-696	U	174	236585	0.000735465	188	200772	0.000936386	181	0.78543	-2.7477	0.522987	-0.0221011	0.34795
28S-697	G	317	235247	0.00134752	296	198143	0.00149387	306.5	0.902033	-2.69274	0.530771	-0.00906906	0.346526
28S-698	C	899	233115	0.00385647	775	195924	0.00395562	837	0.974934	0.0196949	1.99938	0.0302819	0.0540582
28S-699	U	539	226863	0.00237588	487	187027	0.0026039	513	0.912432	-1.40123	0.816249	-0.000993039	0.285912
28S-700	G	582	226094	0.00257415	633	183135	0.00345647	607.5	0.744735	-0.215175	1.61294	-0.0503427	0.108639
28S-701	G	385	224957	0.00171144	444	181792	0.00244235	414.5	0.700734	-0.00503659	1.95018	-0.0505097	0.0595741
28S-702	G	435	226717	0.00191869	361	182126	0.00198214	398	0.967988	-0.499898	1.30676	0.00564152	0.169866
28S-703	A	211	228228	0.000924514	172	182718	0.000941341	191.5	0.982124	-0.947804	1.00626	-0.00474327	0.240456
28S-704	G	234	230742	0.00101412	183	183808	0.000995604	208.5	1.0186	-0.494374	1.31159	-0.000654666	0.168795
28S-705	C	1738	231165	0.00751844	1555	184051	0.00844875	1646.5	0.889888	-1.05277	0.954809	0.0159635	0.252898
28S-706	C	342	228184	0.00149879	368	180933	0.0020339	355	0.736904	-0.471159	1.33228	-0.0379162	0.16424
28S-707	C	1009	227121	0.00444257	897	180377	0.00497292	953	0.893352	-1.49277	0.786272	0.00421909	0.292863
28S-708	U	543	227977	0.00238182	540	181926	0.00296824	541.5	0.802435	-1.99031	0.65545	-0.0294814	0.321825
28S-709	U	144	236983	0.000607639	157	192819	0.000814235	150.5	0.746269	-1.48035	0.790212	-0.0243668	0.291955
28S-710	U	183	245354	0.000745861	200	203308	0.000983729	191.5	0.758198	-1.50691	0.781838	-0.0248992	0.293883
28S-711	U	1380	248892	0.00554457	2421	211992	0.0114202	1900.5	0.485504	0.836473	11.9858	-0.40629	2.54477e-32
28S-712	G	789	254055	0.00310563	874	222853	0.00392187	831.5	0.791874	-0.954186	1.00298	-0.0375364	0.241251
28S-713	U	411	249551	0.00164696	397	222978	0.00178044	404	0.925026	-1.27332	0.862175	-0.00379615	0.275102
28S-714	G	490	252906	0.00193748	568	225322	0.00252084	529	0.768586	-0.715542	1.1425	-0.03554	0.207715
28S-715	G	521	250258	0.00208185	621	221869	0.00279895	571	0.743798	-0.242381	1.57762	-0.0441541	0.114937
28S-716	G	551	252971	0.00217812	646	223264	0.00289344	598.5	0.752778	-0.334292	1.46894	-0.042647	0.135628
28S-717	U	515	253007	0.00203552	501	223328	0.00224334	508	0.907361	-1.6144	0.749693	-0.00421068	0.301207
28S-718	C	678	257997	0.00262794	960	225958	0.00424858	819	0.618545	0.56484	4.50409	-0.10844	1.56922e-05
28S-719	U	197	256648	0.000767588	216	224475	0.000962245	206.5	0.797705	-3.38302	0.44718	-0.0211461	0.360983
28S-720	C	827	260817	0.00317081	838	226101	0.00370631	832.5	0.855516	-16.6387	0.11112	-0.0142308	0.396487
28S-721	C	1227	262948	0.00466632	1427	227969	0.00625962	1327	0.745464	0.171302	2.36516	-0.0773476	0.024333
28S-722	U	368	264953	0.00138893	342	231123	0.00147973	355	0.938633	-1.07263	0.945657	-0.00405359	0.255107
28S-723	G	498	271917	0.00183144	626	237930	0.00263103	562	0.696094	0.164959	2.34719	-0.0542821	0.0253853
28S-724	G	537	274411	0.00195692	595	239909	0.00248011	566	0.789046	-1.25277	0.870042	-0.0304674	0.273235
28S-725	G	672	276653	0.00242904	690	240896	0.00286431	681	0.848036	-138.271	0.0140733	-0.0167617	0.398903
28S-726	U	263	277089	0.000949154	225	241261	0.0009326	244	1.01775	-0.385875	1.41427	-0.00173259	0.146751
28S-727	G	686	281051	0.00244084	541	242649	0.00222956	613.5	1.09476	0.375689	3.13946	0.0349502	0.00288844
28S-728	A	794	279050	0.00284537	326	239497	0.00136119	560	2.09036	0.808638	10.2424	0.142167	6.61933e-24
28S-729	G	378	280247	0.00134881	388	239170	0.00162228	383	0.83143	-8.60504	0.20406	-0.0191847	0.390722
28S-730	C	1742	280816	0.00620335	1751	239069	0.00732425	1746.5	0.846961	-38.9609	0.049048	-0.0178845	0.398463
28S-731	G	817	279093	0.00292734	904	236993	0.00381446	860.5	0.767433	-0.324431	1.47988	-0.0457158	0.133459
28S-732	G	324	278546	0.00116318	342	235416	0.00145275	333	0.800678	-2.66995	0.534067	-0.0231011	0.345918
28S-733	A	201	278630	0.000721387	216	234120	0.000922604	208.5	0.781903	-2.30081	0.593794	-0.0223245	0.334461
28S-734	G	413	278654	0.00148212	426	231703	0.00183856	419.5	0.806133	-2.69857	0.529934	-0.0239082	0.34668
28S-735	A	299	274853	0.00108785	165	227001	0.000726869	232	1.49663	0.538073	4.24309	0.0276936	4.91392e-05
28S-736	G	320	274223	0.00116693	270	223860	0.00120611	295	0.967518	-0.748162	1.12118	-0.0030865	0.212788
28S-737	U	281	273987	0.0010256	311	222163	0.00139987	296	0.732635	-0.547643	1.26644	-0.0318061	0.178909
28S-738	A	320	274512	0.0011657	201	217556	0.0009239	260.5	1.26172	0.380748	3.16511	0.0192966	0.0026641
28S-739	G	301	270328	0.00111346	311	211820	0.00146823	306	0.758372	-0.987515	0.986156	-0.0290043	0.24532
28S-740	G	799	270770	0.00295084	612	212170	0.00288448	705.5	1.02301	0.206025	2.46859	0.0306313	0.0189508
28S-741	C	1282	271131	0.00472834	1115	211329	0.00527613	1198.5	0.896176	-1.09403	0.935994	0.00688233	0.257437
28S-742	G	681	270979	0.00251311	582	210025	0.0027711	631.5	0.9069	-1.36567	0.828518	-0.00143582	0.283042
28S-743	A	181	267698	0.000676135	201	206955	0.000971226	191	0.696167	-0.431997	1.36872	-0.0304501	0.156354
28S-744	G	203	269343	0.000753686	209	208557	0.00100212	206	0.752088	-1.25636	0.868654	-0.0256309	0.273564
28S-745	U	296	267731	0.00110559	288	207961	0.00138488	292	0.79833	-2.73354	0.524972	-0.0230988	0.347588
28S-746	U	189	260562	0.000725355	256	201286	0.00127182	222.5	0.570328	0.334919	2.94701	-0.0497922	0.00518822
28S-747	C	752	261823	0.00287217	677	202171	0.00334865	714.5	0.85771	-13.3015	0.137048	-0.0137614	0.395213
28S-748	C	743	263574	0.00281894	786	209037	0.0037601	764.5	0.749699	-0.141113	1.71762	-0.0515614	0.0912593
28S-749	U	363	266967	0.00135972	414	212662	0.00194675	388.5	0.698455	-0.020829	1.92001	-0.0440281	0.0631556
28S-750	U	447	272472	0.00164054	478	222140	0.0021518	462.5	0.762403	-0.69599	1.15567	-0.0340042	0.204595
28S-751	C	1308	277339	0.00471625	1287	229518	0.0056074	1297.5	0.841076	-10.6766	0.167857	-0.0206627	0.393361
28S-752	C	1328	278362	0.00477077	1376	233251	0.00589922	1352	0.808711	-1.19561	0.892688	-0.0388079	0.267835
28S-753	G	609	271423	0.00224373	623	226417	0.00275156	616	0.815439	-2.92184	0.499765	-0.0251747	0.352107
28S-754	A	262	274172	0.000955605	288	230268	0.00125072	275	0.764046	-1.24445	0.873266	-0.0264877	0.272468
28S-755	C	804	277626	0.00289598	1002	233812	0.00428549	903	0.675764	0.426763	3.41918	-0.0862124	0.00115421
28S-756	C	579	288087	0.00200981	665	246187	0.0027012	622	0.744044	-0.19277	1.64323	-0.0431265	0.103411
28S-757	C	612	285172	0.00214607	689	243487	0.00282972	650.5	0.758405	-0.3637	1.43727	-0.0405764	0.142017
28S-758	G	788	285740	0.00275775	707	244940	0.00288642	747.5	0.955423	-0.214308	1.61409	0.0123439	0.108438
28S-759	U	153	286263	0.000534474	141	246463	0.000572094	147	0.934241	-2.37869	0.580107	-0.0119335	0.337159
28S-760	C	501	283946	0.00176442	480	243968	0.00196747	490.5	0.896796	-2.22874	0.607047	-0.00767583	0.33181
28S-761	U	350	278490	0.00125678	319	237514	0.00134308	334.5	0.935744	-1.20293	0.889724	-0.0055689	0.268543
28S-762	U	320	274043	0.0011677	238	234706	0.00101403	279	1.15154	0.226575	2.53418	0.0122982	0.0160832
28S-763	G	391	277098	0.00141105	389	240772	0.00161564	390	0.873373	-5.99937	0.280025	-0.0128103	0.383604
28S-764	A	255267	268520	0.950644	218368	229110	0.953114	236818	0.997409	0.949951	39.1619	13.2709	0
28S-765	A	64	267219	0.000239504	63	226220	0.00027849	63.5	0.860009	-37.0131	0.0515612	-0.0162263	0.398412
28S-766	A	2165	313003	0.00691687	1839	282622	0.00650692	2002	1.063	0.609534	5.01964	0.114278	1.34738e-06
28S-767	C	161	318324	0.000505774	299	291411	0.00102604	230	0.492937	0.515828	4.04815	-0.0508183	0.000110256
28S-768	A	1892	319018	0.0059307	2615	291931	0.0089576	2253.5	0.662086	0.666215	5.87205	-0.173702	1.29859e-08
28S-769	C	280	320539	0.000873529	415	299811	0.00138421	347.5	0.631069	0.285862	2.74457	-0.0448372	0.00923033
28S-770	G	132	318825	0.00041402	222	297578	0.000746023	177	0.55497	0.298077	2.79233	-0.0371108	0.00808705
28S-771	G	736	312306	0.00235666	785	290166	0.00270535	760.5	0.871113	-4.5197	0.355092	-0.0108854	0.374567
28S-772	A	561	313162	0.00179141	519	291328	0.0017815	540	1.00556	0.00229617	1.96451	0.00968449	0.0579259
28S-773	C	580	308101	0.0018825	672	283321	0.00237187	626	0.793678	-1.3299	0.841239	-0.0288268	0.280052
28S-774	C	444	310394	0.00143044	568	285746	0.00198778	506	0.719617	-0.0573725	1.85365	-0.0406578	0.0715792
28S-775	A	172	306793	0.000560639	190	280137	0.00067824	181	0.826609	-9.93191	0.179292	-0.0179385	0.392581
28S-776	A	317	305202	0.00103866	319	278392	0.00114587	318	0.906438	-2.35642	0.583956	-0.0103297	0.336404
28S-777	G	400	303949	0.00131601	475	276277	0.00171929	437.5	0.765439	-0.812418	1.08143	-0.0299989	0.22231
28S-778	G	401	301876	0.00132836	402	273622	0.00146918	401.5	0.904151	-2.10668	0.630898	-0.00889992	0.326948
28S-779	A	410	299313	0.0013698	438	269098	0.00162766	424	0.841579	-20.8325	0.0897744	-0.0176424	0.397338
28S-780	G	285	296523	0.00096114	258	263834	0.000977888	271.5	0.982873	-0.625609	1.2057	-0.00421745	0.192859
28S-781	U	782	292911	0.00266975	883	260351	0.00339158	832.5	0.787172	-0.799444	1.08923	-0.0361917	0.220437
28S-782	C	1639	288186	0.0056873	1976	251984	0.00784177	1807.5	0.725257	0.413517	3.34196	-0.107603	0.00149852
28S-783	U	1104	290212	0.00380412	1005	256371	0.0039201	1054.5	0.970413	0.0965754	2.16952	0.0281973	0.0379171
28S-784	A	99	294613	0.000336034	106	265792	0.000398808	102.5	0.842596	-50.5451	0.0380249	-0.0167535	0.398654
28S-785	A	205	289516	0.000708078	197	264646	0.000744391	201	0.951219	-1.4325	0.805754	-0.00936669	0.288356
28S-786	C	618	287442	0.00215	948	262061	0.00361748	783	0.594336	0.603709	4.94587	-0.10301	1.946e-06
28S-787	U	283	281955	0.00100371	323	257269	0.0012555	303	0.79945	-2.75202	0.522386	-0.0223516	0.348059
28S-788	U	469	279135	0.00168019	875	253982	0.00344513	672	0.487701	0.722102	7.05296	-0.133387	6.2963e-12
28S-789	G	240	283945	0.000845234	283	261245	0.00108327	261.5	0.780259	-1.87698	0.681271	-0.0235034	0.316319
28S-790	U	224	282367	0.000793294	239	262733	0.000909669	231.5	0.872069	-8.59603	0.204251	-0.0145407	0.390707
28S-791	G	308	281802	0.00109297	352	259253	0.00135775	330	0.804985	-3.06197	0.482525	-0.0221213	0.355101
28S-792	U	305	275644	0.0011065	339	254027	0.0013345	322	0.829147	-8.2619	0.21162	-0.0189974	0.390109
28S-793	G	480	273088	0.00175768	469	248771	0.00188527	474.5	0.932321	-0.922047	1.01975	-0.0017558	0.237193
28S-794	C	2454	268696	0.009133	2559	240622	0.0106349	2506.5	0.858773	-5.80854	0.287874	-0.00670674	0.38275
28S-795	G	744	263986	0.00281833	740	234534	0.00315519	742	0.893236	-1.83064	0.692423	-0.00339433	0.313905
28S-796	A	173	259806	0.000665881	213	229951	0.000926284	193	0.718874	-0.700025	1.15292	-0.0278302	0.205244
28S-797	G	256	256256	0.000999001	275	225893	0.00121739	265.5	0.820608	-6.08692	0.276566	-0.0197557	0.383973
28S-798	U	246	249646	0.000985395	228	220134	0.00103573	237	0.951399	-1.23615	0.876505	-0.00655122	0.271697
28S-799	C	981	244256	0.00401628	927	209577	0.0044232	954	0.908004	-0.887684	1.03831	0.00801291	0.232705
28S-800	G	635	236289	0.00268739	575	199598	0.00288079	605	0.932864	-0.691628	1.15865	0.0061851	0.203891
28S-801	U	192	233162	0.000823462	176	197532	0.000890995	184	0.924205	-2.40389	0.575813	-0.010219	0.337997
28S-802	A	306	224888	0.00136068	257	184931	0.00138971	281.5	0.979111	-0.640293	1.19491	0.000470617	0.195374
28S-803	G	264	214475	0.00123091	294	173069	0.00169874	279	0.724601	-0.483327	1.32135	-0.0363522	0.166639
28S-804	G	150	209381	0.000716397	161	168787	0.000953865	155.5	0.751047	-1.56709	0.76351	-0.0252852	0.298074
28S-805	U	174	201519	0.000863442	257	160438	0.00160186	215.5	0.539023	0.406682	3.30346	-0.0631367	0.00170301
28S-806	C	520	191446	0.00271617	483	147237	0.00328043	501.5	0.827993	-6.00828	0.279669	-0.0229717	0.383642
28S-807	G	772	184085	0.00419371	629	139003	0.00452508	700.5	0.926771	-0.69266	1.15794	0.0165528	0.204058
28S-808	A	234	180893	0.00129358	116	136101	0.000852308	175	1.51774	0.478221	3.75638	0.0370126	0.000344258
28S-809	U	227	173805	0.00130606	188	131551	0.0014291	207.5	0.913903	-2.69886	0.529893	-0.00779891	0.346687
28S-810	G	730	170251	0.00428779	553	126634	0.00436692	641.5	0.98188	-0.0681418	1.83496	0.0379961	0.0740895
28S-811	A	261	164029	0.00159118	186	117976	0.00157659	223.5	1.00925	-0.524926	1.28531	0.00721771	0.174654
28S-812	G	1497	160264	0.00934084	1008	113093	0.00891302	1252.5	1.048	0.469984	3.698	0.150086	0.000427929
28S-813	A	234	154484	0.00151472	166	106892	0.00155297	200	0.97537	-1.01015	0.975052	0.00192066	0.248006
28S-814	A	165	141407	0.00116684	173	90216	0.00191762	169	0.608486	0.0877958	2.14864	-0.0598179	0.0396657
28S-815	G	200	137248	0.00145722	112	86135	0.00130028	156	1.12069	-0.150177	1.70409	0.0166652	0.0933973
28S-816	A	148	133956	0.00110484	84	82428	0.00101907	116	1.08416	-0.514468	1.29418	0.00599376	0.172666
28S-817	C	474	129946	0.00364767	344	77433	0.00444255	409	0.821075	-4.87	0.333901	-0.0281449	0.377312
28S-818	C	242	127049	0.00190478	164	75270	0.00217882	203	0.874223	-8.49998	0.206316	-0.0113448	0.390541
28S-819	G	424	126183	0.0033602	272	74679	0.00364226	348	0.92256	-1.56365	0.764536	0.00866096	0.297841
28S-820	A	78	125644	0.000620802	49	74029	0.000661903	63.5	0.937905	-4.01221	0.391045	-0.0109864	0.369577
28S-821	U	94	121474	0.000773828	48	72523	0.000661859	71	1.16917	-0.488117	1.3171	0.00338725	0.167576
28S-822	G	159	119724	0.00132805	103	70804	0.00145472	131	0.912928	-3.78078	0.409975	-0.00777582	0.366785
28S-823	G	176	117918	0.00149256	125	68615	0.00182176	150.5	0.819297	-8.10069	0.215368	-0.0215886	0.389797
28S-824	C	723	116861	0.00618684	517	67098	0.00770515	620	0.802949	-1.86308	0.684578	-0.0498015	0.315606
28S-825	G	355	115362	0.00307727	246	66017	0.00372631	300.5	0.825822	-7.30082	0.236121	-0.0246092	0.387975
28S-826	G	432	112720	0.00383251	283	63460	0.0044595	357.5	0.859402	-16.2193	0.113826	-0.012139	0.396366
28S-827	A	91	109920	0.000827875	92	61415	0.00149801	91.5	0.552651	0.0312922	2.02331	-0.0581968	0.0515173
28S-828	A	65	105285	0.000617372	40	56366	0.000709648	52.5	0.86997	-21.5799	0.0868027	-0.0151148	0.397442
28S-829	U	72	102054	0.000705509	50	54216	0.000922237	61	0.764997	-3.90772	0.399371	-0.0237863	0.368363
28S-830	G	331	101197	0.00327085	162	52219	0.00310232	246.5	1.05432	-0.189624	1.64758	0.0433152	0.102674
28S-831	A	187	98292	0.00190249	96	48854	0.00196504	141.5	0.968172	-1.58843	0.757216	0.0054842	0.299504
28S-832	A	66	96720	0.000682382	38	46932	0.000809682	52	0.842778	-75.6584	0.025568	-0.0169849	0.398812
28S-833	A	80	95003	0.000842079	50	45484	0.00109929	65	0.766022	-3.86172	0.403149	-0.0250763	0.367805
28S-834	G	65	94179	0.000690175	59	44740	0.00131873	62	0.523363	-0.0561226	1.85585	-0.0568355	0.0712886
28S-835	U	44	92994	0.000473149	39	44019	0.000885981	41.5	0.534039	-0.347179	1.45489	-0.042716	0.138443
28S-836	U	131	90938	0.00144054	105	44783	0.00234464	118	0.614398	-0.140881	1.71797	-0.0681588	0.0912046
28S-837	A	200	90524	0.00220936	292	45650	0.0063965	246	0.345401	0.711557	6.79512	-0.318984	3.75355e-11
28S-838	A	99	89382	0.00110761	78	51988	0.00150035	88.5	0.738233	-2.01511	0.650059	-0.0321148	0.32296
28S-839	G	93	92131	0.00100943	61	55119	0.0011067	77	0.912113	-5.30805	0.310714	-0.00995136	0.380142
28S-840	G	72	91305	0.000788566	39	54795	0.000711744	55.5	1.10793	-1.01698	0.97175	0.00079429	0.248804
28S-841	U	129	87212	0.00147915	88	54752	0.00160725	108.5	0.920303	-3.71178	0.415979	-0.00574635	0.365877
28S-842	A	56	87096	0.000642969	56	54186	0.00103348	56	0.622141	-0.698788	1.15376	-0.0385275	0.205045
28S-843	U	47	83892	0.000560244	33	53365	0.000618383	40	0.905983	-8.62055	0.203731	-0.0132037	0.390748
28S-844	U	61	84118	0.000725172	45	54784	0.000821408	53	0.88284	-12.857	0.141445	-0.0139015	0.394971
28S-845	G	89	83562	0.00106508	64	55458	0.00115403	76.5	0.922923	-4.40397	0.362697	-0.00849917	0.373546
28S-846	C	377	84001	0.00448804	311	58062	0.00535634	344	0.837893	-15.1807	0.121132	-0.0220779	0.396026
28S-847	U	131	82557	0.00158678	134	58544	0.00228888	132.5	0.693258	-0.685754	1.16268	-0.0499803	0.202938
28S-848	U	146	82272	0.0017746	126	60082	0.00209713	136	0.846203	-102.883	0.0188673	-0.0170567	0.398871
28S-849	G	152	83773	0.00181443	117	63294	0.00184852	134.5	0.981559	-1.33681	0.838752	0.00650348	0.280638
28S-850	C	446	84340	0.00528812	361	64484	0.00559829	403.5	0.944596	-0.832232	1.06973	0.0337663	0.225124
28S-851	A	126	84531	0.00149058	98	65589	0.00149415	112	0.997607	-1.30248	0.851256	0.00434248	0.277688
28S-852	A	55	84792	0.000648646	43	67265	0.000639263	49	1.01468	-2.14924	0.622372	-0.00656674	0.328699
28S-853	U	59	86067	0.000685512	54	69405	0.000778042	56.5	0.881074	-13.048	0.139521	-0.0141685	0.395078
28S-854	G	108	87762	0.0012306	120	71352	0.0016818	114	0.731715	-1.47278	0.79263	-0.0350309	0.291397
28S-855	C	198	87831	0.00225433	257	71527	0.00359305	227.5	0.627414	0.136998	2.27114	-0.0912646	0.0302585
28S-856	U	113	87206	0.00129578	112	72666	0.0015413	112.5	0.840708	-36.8785	0.0517444	-0.0177086	0.398409
28S-857	G	199	89878	0.00221411	213	75094	0.00283644	206	0.780594	-2.25449	0.602245	-0.0347232	0.332775
28S-858	A	47	91099	0.000515922	64	76457	0.000837072	55.5	0.616342	-0.651703	1.18665	-0.0348002	0.197304
28S-859	U	73	89434	0.000816244	69	77841	0.000886422	71	0.92083	-4.72568	0.342317	-0.0105323	0.37624
28S-860	G	155	91608	0.00169199	196	78940	0.0024829	175.5	0.681458	-0.350121	1.45172	-0.0555683	0.139083
28S-861	G	169	90848	0.00186025	163	77533	0.00210233	166	0.884851	-6.34649	0.266794	-0.00942804	0.384994
28S-862	G	135	91900	0.00146899	142	77737	0.00182667	138.5	0.804188	-5.14999	0.318699	-0.024194	0.379188
28S-863	A	85	90978	0.000934292	91	76309	0.00119252	88	0.78346	-4.20659	0.376446	-0.0238496	0.371653
28S-864	G	140	90158	0.00155283	137	74557	0.00183752	138.5	0.845068	-71.6529	0.0269776	-0.0171856	0.398797
28S-865	A	50	89936	0.000555951	56	73056	0.000766535	53	0.725278	-2.42345	0.572522	-0.0254179	0.338636
28S-866	U	104	88301	0.00117779	92	70418	0.00130648	98	0.901496	-5.59903	0.297013	-0.010069	0.381728
28S-867	C	286	90709	0.00315294	262	69879	0.00374934	274	0.840932	-23.973	0.0784849	-0.0193389	0.397715
28S-868	C	221	90464	0.00244296	233	68265	0.00341317	227	0.715746	-0.526774	1.28375	-0.0592105	0.175004
28S-869	U	148	92007	0.00160857	119	68712	0.00173187	133.5	0.928809	-2.78392	0.517982	-0.00352795	0.348858
28S-870	U	170	95840	0.00177379	251	69946	0.00358848	210.5	0.494301	0.494339	3.87611	-0.136026	0.00021799
28S-871	C	263	101322	0.00259569	214	71490	0.00299343	238.5	0.867129	-11.023	0.16302	-0.0114058	0.393676
28S-872	U	151	102547	0.0014725	170	71305	0.00238412	160.5	0.617625	0.0224558	2.00502	-0.068306	0.0534505
28S-873	C	310	108125	0.00286705	231	73491	0.00314324	270.5	0.912132	-2.33992	0.58684	0.00213362	0.335837
28S-874	C	194	110432	0.00175674	179	75896	0.00235849	186.5	0.744857	-1.2017	0.890223	-0.0395702	0.268424
28S-875	A	188	115077	0.00163369	142	79196	0.00179302	165	0.911138	-3.33984	0.45163	-0.00604473	0.360262
28S-876	C	493	121163	0.0040689	459	84236	0.00544898	476	0.746727	-0.404587	1.39543	-0.0688231	0.150687
28S-877	U	194	127407	0.00152268	149	88553	0.00168261	171.5	0.904952	-3.70819	0.416296	-0.00766699	0.365829
28S-878	G	212	137252	0.0015446	223	95933	0.00232454	217.5	0.664478	-0.0889	1.79998	-0.0567842	0.0789528
28S-879	G	144	141873	0.00101499	135	99942	0.00135078	139.5	0.75141	-1.72643	0.718888	-0.0288884	0.308098
28S-880	A	177	148136	0.00119485	123	104438	0.00117773	150	1.01453	-0.808757	1.08362	0.00179727	0.221784
28S-881	G	196	158821	0.00123409	143	112231	0.00127416	169.5	0.968556	-1.29709	0.853252	-0.00220454	0.277216
28S-882	A	163	165268	0.000986277	139	117444	0.00118354	151	0.833326	-16.2196	0.113824	-0.0182522	0.396366
28S-883	G	279	173989	0.00160355	319	123669	0.00257947	299	0.62166	0.269178	2.68191	-0.0715722	0.0109407
28S-884	G	131	178479	0.00073398	147	127234	0.00115535	139	0.635287	-0.15148	1.70216	-0.039697	0.0937046
28S-885	G	479	181686	0.00263642	352	129810	0.00271166	415.5	0.972254	-0.425429	1.37502	0.0148824	0.155007
28S-886	C	1255	185504	0.00676535	960	132808	0.00722848	1107.5	0.93593	-0.212772	1.61613	0.0425258	0.10808
28S-887	G	1669	190123	0.00877853	1227	135778	0.00903681	1448	0.971419	0.231569	2.55065	0.0874123	0.0154236
28S-888	C	525	192758	0.00272362	487	137417	0.00354396	506	0.768526	-0.754928	1.11686	-0.0432813	0.21382
28S-889	A	119	198292	0.000600125	117	141384	0.000827534	118	0.725197	-1.29592	0.853687	-0.0261325	0.277113
28S-890	U	499	205335	0.00243018	334	147994	0.00225685	416.5	1.0768	0.185745	2.40711	0.0317732	0.0220152
28S-891	C	732	215741	0.00339296	670	155815	0.00429997	701	0.789065	-1.02795	0.966492	-0.0406973	0.250076
28S-892	C	941	221735	0.0042438	923	160941	0.00573502	932	0.739981	0.0635115	2.09292	-0.0752024	0.0446409
28S-893	C	677	234683	0.00288474	823	171657	0.00479444	750	0.601684	0.582129	4.69044	-0.127843	6.66213e-06
28S-894	A	715	247074	0.00289387	557	182027	0.00305999	636	0.945714	-0.445031	1.35637	0.0112894	0.159006
28S-895	G	586	258155	0.00226995	582	191648	0.00303682	584	0.747478	-0.276133	1.53589	-0.0454534	0.12265
28S-896	G	388	260132	0.00149155	477	192581	0.00247688	432.5	0.602189	0.448428	3.55348	-0.0739112	0.00072267
28S-897	G	356	262415	0.00135663	316	193810	0.00163046	336	0.832052	-9.65345	0.183978	-0.019103	0.392247
28S-898	G	427	264643	0.00161349	358	194957	0.0018363	392.5	0.878665	-4.76454	0.34001	-0.0113917	0.376536
28S-899	C	611	265917	0.00229771	483	195151	0.00247501	547	0.928365	-0.880347	1.04236	0.00194176	0.231727
28S-900	G	719	268163	0.00268121	522	196410	0.00265771	620.5	1.00884	0.0833049	2.13812	0.0233893	0.0405708
28S-901	U	368	269507	0.00136546	287	197556	0.00145275	327.5	0.93991	-1.13562	0.917767	-0.00410671	0.261823
28S-902	C	1166	277307	0.00420473	1084	203412	0.00532909	1125	0.789015	-0.598809	1.22591	-0.0465101	0.188178
28S-903	G	1248	279600	0.00446352	977	205645	0.00475091	1112.5	0.939509	-0.163454	1.68464	0.023886	0.096526
28S-904	U	584	281200	0.00207681	427	207479	0.00205804	505.5	1.00912	-0.0137247	1.93346	0.0144397	0.0615393
28S-905	G	1116	288729	0.00386522	735	212475	0.00345923	925.5	1.11736	0.527098	4.14462	0.0706765	7.42643e-05
28S-906	A	359	287708	0.00124779	322	210121	0.00153245	340.5	0.814247	-4.09898	0.384391	-0.0215097	0.370532
28S-907	U	289	292813	0.000986978	260	213533	0.00121761	274.5	0.810586	-4.1257	0.382387	-0.0209023	0.370816
28S-908	C	1450	298519	0.00485731	1275	216888	0.00587861	1362.5	0.826269	-2.92943	0.498801	-0.0290372	0.352276
28S-909	C	1014	300144	0.00337838	1029	217518	0.00473064	1021.5	0.714148	0.289125	2.75717	-0.0764005	0.0089159
28S-910	C	718	302899	0.00237043	663	219839	0.00301584	690.5	0.785991	-0.939563	1.01054	-0.0343462	0.239421
28S-911	G	1070	304536	0.00351354	927	221027	0.00419406	998.5	0.837743	-8.35426	0.20953	-0.02093	0.39028
28S-912	U	307	303821	0.00101046	258	221780	0.00116331	282.5	0.868607	-9.21384	0.191896	-0.0143683	0.391664
28S-913	U	325	307962	0.00105533	270	224591	0.00120219	297.5	0.877839	-5.80933	0.287841	-0.0132543	0.382753
28S-914	G	417	310033	0.00134502	331	225687	0.00146663	374	0.917079	-1.63449	0.743976	-0.00713255	0.302496
28S-915	C	3165	309980	0.0102103	3539	226882	0.0155984	3352	0.654575	0.738778	7.5032	-0.301237	2.37657e-13
28S-916	G	909	312107	0.00291246	861	227949	0.00377716	885	0.771072	-0.371784	1.4288	-0.0441394	0.143752
28S-917	G	655	312099	0.00209869	538	228175	0.00235784	596.5	0.890092	-2.40067	0.576357	-0.00740638	0.337891
28S-918	A	202	313290	0.00064477	160	229041	0.000698565	181	0.922992	-2.49579	0.560674	-0.0116584	0.340917
28S-919	U	273	314946	0.000866815	209	229592	0.00091031	241	0.952219	-1.20837	0.887531	-0.00768773	0.269067
28S-920	G	361	318125	0.00113477	296	232350	0.00127394	328.5	0.890759	-3.5112	0.434474	-0.011514	0.363011
28S-921	C	5273	317714	0.0165967	4555	231665	0.019662	4914	0.844099	-8.77645	0.200482	-0.0254747	0.391005
28S-922	G	917	307822	0.00297899	720	222613	0.00323431	818.5	0.92106	-0.686732	1.16201	0.00538541	0.203097
28S-923	A	386	309755	0.00124615	272	223954	0.00121454	329	1.02603	-0.14781	1.7076	0.0036805	0.0928391
28S-924	C	1849	312840	0.00591037	1555	226209	0.00687417	1702	0.859793	-6.50662	0.261103	-0.00951666	0.385573
28S-925	G	872	328297	0.00265613	742	239606	0.00309675	807	0.857716	-12.4655	0.145557	-0.0139668	0.394738
28S-926	C	661	315607	0.00209438	580	228482	0.00253849	620.5	0.825047	-4.5216	0.35497	-0.0222138	0.374584
28S-927	A	328	318320	0.00103041	237	230634	0.0010276	282.5	1.00273	-0.408522	1.39153	-0.00167588	0.151508
28S-928	C	1014	319448	0.00317423	949	232192	0.00408713	981.5	0.776638	-0.408003	1.39204	-0.0442699	0.1514
28S-929	C	847	334084	0.00253529	1043	245460	0.00424916	945	0.596656	0.636517	5.39227	-0.117188	1.93649e-07
28S-930	U	1122	337165	0.00332775	890	249104	0.0035728	1006	0.93141	-0.337345	1.46559	0.0111503	0.136297
28S-931	A	198	349625	0.000566321	149	263125	0.000566271	173.5	1.00009	-0.823634	1.07478	-0.00847854	0.22391
28S-932	G	377	353377	0.00106685	430	269539	0.00159532	403.5	0.668738	0.180146	2.39067	-0.0435134	0.0229007
28S-933	A	221	353709	0.000624807	224	270929	0.000826785	222.5	0.755707	-1.26087	0.866924	-0.023755	0.273975
28S-934	G	587	354958	0.00165372	589	273170	0.00215617	588	0.766971	-0.593157	1.23026	-0.0331148	0.187175
28S-935	C	1439	350053	0.00411081	1548	267669	0.00578326	1493.5	0.710811	0.427988	3.4265	-0.0915377	0.00112566
28S-936	A	204	348068	0.000586092	180	265929	0.000676872	192	0.865883	-13.3427	0.136655	-0.0154393	0.395235
28S-937	C	909	339130	0.00268039	1066	256869	0.00414998	987.5	0.64588	0.54227	4.282	-0.0956543	4.16301e-05
28S-938	A	213	338486	0.000629273	220	255681	0.000860447	216.5	0.731332	-0.788813	1.0957	-0.0260193	0.218883
28S-939	C	953	334322	0.00285055	1119	252460	0.00443239	1036	0.643118	0.559965	4.45419	-0.10219	1.9622e-05
28S-940	A	243	329834	0.000736734	170	248150	0.00068507	206.5	1.07542	-0.160605	1.68877	-0.00194651	0.095855
28S-941	U	1592	324649	0.00490376	1263	250460	0.00504272	1427.5	0.972443	0.234036	2.55887	0.0419631	0.0151034
28S-942	G	663	327120	0.00202678	502	253030	0.00198395	582.5	1.02159	0.119359	2.22565	0.0156473	0.0335171
28S-943	A	410	316444	0.00129565	374	241281	0.00155006	392	0.83587	-11.762	0.153581	-0.0184197	0.394265
28S-944	U	405	306031	0.0013234	344	236698	0.00145333	374.5	0.910596	-1.894	0.677262	-0.00810242	0.317182
28S-945	G	515	302060	0.00170496	554	233327	0.00237435	534.5	0.718074	-0.0140242	1.93289	-0.0456969	0.0616073
28S-946	G	594	295227	0.00201201	568	225758	0.00251597	581	0.799696	-1.72316	0.719753	-0.0281528	0.307906
28S-947	G	535	289966	0.00184504	502	219628	0.00228568	518.5	0.807218	-2.41853	0.573347	-0.0254733	0.338476
28S-948	A	406	284242	0.00142836	335	215167	0.00155693	370.5	0.917421	-1.63112	0.74493	-0.00650485	0.302281
28S-949	C	554	277597	0.0019957	547	208842	0.0026192	550.5	0.761948	-0.547007	1.26696	-0.0379148	0.178791
28S-950	C	681	274299	0.00248269	686	205960	0.00333074	683.5	0.745387	-0.154001	1.69844	-0.0489083	0.0942989
28S-951	C	654	266182	0.00245697	730	199434	0.00366036	692	0.671236	0.363981	3.08167	-0.0776019	0.00345728
28S-952	G	1465	265420	0.00551955	1150	200515	0.00573523	1307.5	0.962394	0.13305	2.2608	0.0445821	0.030976
28S-953	A	155	265310	0.000584222	119	202265	0.000588337	137	0.993006	-1.14407	0.914148	-0.00855667	0.262692
28S-954	A	383	261754	0.00146321	336	198470	0.00169295	359.5	0.864293	-10.5591	0.169564	-0.0140765	0.393248
28S-955	A	203	261672	0.00077578	182	199591	0.000911865	192.5	0.850763	-131.723	0.0147676	-0.0163604	0.398899
28S-956	G	171	254691	0.000671402	159	193716	0.000820789	165	0.817995	-7.22344	0.238343	-0.0189015	0.38777
28S-957	A	131	249157	0.000525773	135	189701	0.000711646	133	0.738812	-1.44897	0.800335	-0.0238759	0.289614
28S-958	U	169	242352	0.000697333	163	186646	0.000873311	166	0.798493	-3.96882	0.39446	-0.0206536	0.369082
28S-959	G	340	241507	0.00140783	344	185431	0.00185514	342	0.75888	-0.891607	1.03616	-0.0322068	0.233226
28S-960	G	471	239163	0.00196937	468	182727	0.0025612	469.5	0.768925	-0.828876	1.0717	-0.035763	0.224651
28S-961	U	178	236917	0.000751318	182	181422	0.00100319	180	0.748932	-1.33319	0.840053	-0.0259379	0.280331
28S-962	G	378	233722	0.00161731	301	177283	0.00169785	339.5	0.952561	-0.852505	1.05803	3.94204e-06	0.227945
28S-963	A	318	230611	0.00137895	293	173488	0.00168888	305.5	0.816486	-4.75849	0.340367	-0.0216644	0.37649
28S-964	C	702	231798	0.0030285	586	174372	0.00336063	644	0.90117	-1.59299	0.755884	-3.61875e-05	0.299806
28S-965	C	546	235800	0.00231552	599	179833	0.00333087	572.5	0.695171	0.178714	2.3865	-0.0646167	0.0231298
28S-966	U	382	229608	0.00166371	284	178488	0.00159114	333	1.0456	-0.0352929	1.89318	0.012868	0.0664695
28S-967	A	109	235167	0.0004635	88	183724	0.000478979	98.5	0.967684	-2.02399	0.648151	-0.011175	0.32336
28S-968	U	158	230924	0.000684208	147	187218	0.000785181	152.5	0.871401	-11.1655	0.161111	-0.0148602	0.393798
28S-969	G	268	233418	0.00114815	237	187170	0.00126623	252.5	0.906752	-2.7482	0.522918	-0.00964264	0.347963
28S-970	C	2015	233191	0.00864099	1822	186246	0.00978276	1918.5	0.883287	-1.25857	0.867805	0.0150274	0.273766
28S-971	C	803	232480	0.00345406	1011	184906	0.00546764	907	0.631728	0.557939	4.43378	-0.128049	2.14853e-05
28S-972	U	369	228634	0.00161393	307	182377	0.00168333	338	0.958776	-0.755466	1.11651	0.000845097	0.213902
28S-973	G	291	229597	0.00126744	295	181739	0.00162321	293	0.780824	-1.73887	0.715625	-0.0269002	0.30882
28S-974	G	1166	230059	0.00506827	1003	182064	0.00550905	1084.5	0.919989	-0.482976	1.32167	0.0202346	0.16657
28S-975	C	1835	230486	0.00796144	1662	181793	0.00914227	1748.5	0.870839	-2.68529	0.531844	0.00227503	0.346328
28S-976	C	527	230453	0.0022868	572	180982	0.00316054	549.5	0.723548	-0.0474138	1.87128	-0.0537345	0.0692678
28S-977	A	634	225450	0.00281215	474	176752	0.00268172	554	1.04864	0.208479	2.47625	0.0337715	0.0185955
28S-978	G	379	221882	0.00170812	336	173742	0.0019339	357.5	0.883248	-4.23957	0.374076	-0.010287	0.371984
28S-979	G	409	218113	0.00187517	343	171375	0.00200146	376	0.936904	-1.05389	0.954285	1.52045e-05	0.253025
28S-980	U	362	212518	0.00170339	335	169452	0.00197696	348.5	0.861618	-13.1847	0.138177	-0.014164	0.395152
28S-981	C	494	212979	0.00231948	544	168047	0.00323719	519	0.71651	-0.0157378	1.92963	-0.0567769	0.0619965
28S-982	G	534	209509	0.00254882	543	166092	0.00326927	538.5	0.779628	-0.983931	0.987937	-0.0377982	0.244889
28S-983	A	190	206125	0.000921771	162	163679	0.000989742	176	0.931324	-2.19474	0.613508	-0.00885951	0.330505
28S-984	A	197	202403	0.000973306	185	159453	0.00116022	191	0.8389	-22.8261	0.0822629	-0.0176106	0.397595
28S-985	G	160	200164	0.000799345	143	156962	0.000911049	151.5	0.87739	-8.67357	0.202614	-0.0140825	0.390837
28S-986	U	257	193922	0.00132528	383	152844	0.00250582	320	0.528878	0.532341	4.19109	-0.091833	6.1188e-05
28S-987	C	344	191602	0.00179539	280	145886	0.00191931	312	0.935436	-1.29282	0.854843	-0.00092794	0.27684
28S-988	A	328	181616	0.00180601	261	134892	0.00193488	294.5	0.933395	-1.41594	0.811279	-0.00117228	0.287071
28S-989	G	375	172362	0.00217565	371	123586	0.00300196	373	0.724745	-0.286099	1.52399	-0.0515298	0.124904
28S-990	G	443	167967	0.00263742	402	119151	0.00337387	422.5	0.78172	-1.31717	0.84586	-0.0378162	0.278962
28S-991	G	423	166021	0.00254787	335	116827	0.00286749	379	0.888537	-3.43558	0.441881	-0.00585592	0.361835
28S-992	G	371	163106	0.00227459	268	112724	0.00237749	319.5	0.956722	-0.846483	1.06148	0.00754546	0.227113
28S-993	A	100	158125	0.000632411	58	106810	0.00054302	79	1.16462	-0.415266	1.3849	-0.000418674	0.152909
28S-994	A	89	150030	0.000593215	60	97282	0.000616764	74.5	0.961819	-2.67371	0.53352	-0.00997845	0.346019
28S-995	A	224	148824	0.00150513	141	95103	0.0014826	182.5	1.0152	-0.642619	1.19322	0.00663018	0.195769
28S-996	C	461	149901	0.00307536	328	95278	0.00344256	394.5	0.893337	-2.90727	0.501629	-0.00216668	0.351778
28S-997	C	313	151588	0.00206481	188	95485	0.0019689	250.5	1.04871	-0.189106	1.6483	0.0204189	0.102552
28S-998	C	255	148171	0.00172098	220	92851	0.00236939	237.5	0.726342	-0.642072	1.19361	-0.0437963	0.195676
28S-999	U	228	148252	0.00153792	150	93651	0.00160169	189	0.960186	-1.34186	0.83694	0.000215247	0.281064
28S-1000	G	284	150848	0.00188269	156	95351	0.00163606	220	1.15075	0.115096	2.21493	0.0298513	0.0343246
28S-1001	A	121	152361	0.000794166	88	96496	0.000911955	104.5	0.87084	-14.1929	0.129008	-0.014641	0.395636
28S-1002	U	105	151722	0.000692055	56	96742	0.000578859	80.5	1.19555	-0.301316	1.50617	0.00232515	0.128323
28S-1003	G	237	153978	0.00153918	227	97663	0.00232432	232	0.662207	-0.0428661	1.87944	-0.057276	0.0682159
28S-1004	G	258	153522	0.00168054	200	96758	0.00206701	229	0.813029	-5.0371	0.324659	-0.0234883	0.378462
28S-1005	A	279	155663	0.00179233	202	98364	0.0020536	240.5	0.872778	-8.21204	0.212765	-0.0119207	0.390014
28S-1006	G	258	158649	0.00162623	258	100029	0.00257925	258	0.630505	0.173575	2.37166	-0.0694251	0.0239611
28S-1007	G	571	158730	0.0035973	384	100160	0.00383387	477.5	0.938297	-0.811793	1.0818	0.0156511	0.22222
28S-1008	A	262	156878	0.00167009	216	97847	0.00220753	239	0.756542	-1.21651	0.884275	-0.0356721	0.269845
28S-1009	C	404	157553	0.00256422	327	96990	0.00337148	365.5	0.760561	-0.880078	1.04251	-0.0445004	0.231691
28S-1010	C	331	158642	0.00208646	275	97894	0.00280916	303	0.742734	-0.69798	1.15431	-0.0445356	0.204916
28S-1011	G	806	159467	0.00505434	518	98559	0.00525574	662	0.96168	-0.2375	1.58384	0.0391217	0.113812
28S-1012	A	107	160351	0.000667286	86	99570	0.000863714	96.5	0.772578	-3.26608	0.459439	-0.0227101	0.358983
28S-1013	A	184	160490	0.00114649	137	98628	0.00138906	160.5	0.825372	-10.0866	0.17679	-0.0195913	0.392756
28S-1014	G	201	162909	0.00123382	165	99941	0.00165097	183	0.747327	-1.29132	0.855401	-0.0322711	0.276708
28S-1015	C	553	162848	0.0033958	412	99430	0.00414362	482.5	0.819526	-4.10729	0.383765	-0.0279652	0.370621
28S-1016	G	312	163827	0.00190445	231	99868	0.00231305	271.5	0.823348	-6.84433	0.249862	-0.0220768	0.386681
28S-1017	A	147	161835	0.000908333	119	98237	0.00121136	133	0.749848	-1.76228	0.709559	-0.027789	0.310157
28S-1018	U	283	162116	0.00174566	188	98600	0.00190669	235.5	0.915545	-2.42415	0.572405	-0.00459188	0.338659
28S-1019	U	128	162139	0.000789446	90	99494	0.000904577	109	0.872724	-12.738	0.14267	-0.0144961	0.394903
28S-1020	C	766	162127	0.00472469	768	99601	0.00771077	767	0.61274	0.562108	4.47599	-0.187555	1.78021e-05
28S-1021	U	162	160964	0.00100644	125	100717	0.0012411	143.5	0.810922	-6.19713	0.272331	-0.0209478	0.38442
28S-1022	G	234	161834	0.00144593	160	102837	0.00155586	197	0.929342	-2.11756	0.628696	-0.00477001	0.327401
28S-1023	A	319	162709	0.00196056	213	106226	0.00200516	266	0.977756	-0.718185	1.14074	0.00773803	0.208132
28S-1024	C	440	162025	0.00271563	369	105619	0.00349369	404.5	0.777296	-1.22246	0.881907	-0.0400243	0.270409
28S-1025	G	467	161502	0.00289161	342	105101	0.00325401	404.5	0.888627	-3.29913	0.455906	-0.00439157	0.359564
28S-1026	U	313	158296	0.00197731	203	102086	0.00198852	258	0.994362	-0.560733	1.25582	0.0106378	0.181322
28S-1027	G	881	157984	0.00557651	606	100765	0.00601399	743.5	0.927257	-0.645151	1.19138	0.0277076	0.196198
28S-1028	C	433	157181	0.00275479	369	99199	0.0037198	401	0.740575	-0.442904	1.35837	-0.054373	0.158575
28S-1029	A	102	155334	0.00065665	78	96589	0.000807545	90	0.813143	-8.6683	0.202724	-0.019231	0.390828
28S-1030	A	167	153787	0.00108592	159	96279	0.00165145	163	0.657554	-0.210518	1.61914	-0.0461978	0.107555
28S-1031	A	554	153072	0.00361921	530	95678	0.00553941	542	0.653357	0.352316	3.02617	-0.118262	0.00409586
28S-1032	U	109	152324	0.00071558	74	96063	0.000770328	91.5	0.928929	-3.59905	0.426175	-0.01073	0.36431
28S-1033	C	965	156005	0.0061857	816	105070	0.00776625	890.5	0.796485	-1.06804	0.947757	-0.0547797	0.2546
28S-1034	G	471	155583	0.00302732	355	106123	0.00334517	413	0.904982	-2.03484	0.645833	0.0010856	0.323846
28S-1035	A	221	156709	0.00141026	180	113353	0.00158796	200.5	0.888094	-5.15989	0.318188	-0.0106786	0.37925
28S-1036	U	216	156957	0.00137617	177	114974	0.00153948	196.5	0.893922	-4.43213	0.360816	-0.0100143	0.373801
28S-1037	C	578	158051	0.00365705	530	116714	0.00454101	554	0.805337	-2.16255	0.619754	-0.035114	0.329234
28S-1038	G	151	157103	0.000961153	120	116553	0.00102957	135.5	0.933544	-2.55587	0.551201	-0.00833679	0.342717
28S-1039	U	132	156499	0.000843456	155	117328	0.00132108	143.5	0.638458	-0.152386	1.70082	-0.042629	0.0939182
28S-1040	C	319	157112	0.0020304	273	117134	0.00233066	296	0.871167	-7.83629	0.221813	-0.0116532	0.389248
28S-1041	G	506	155897	0.00324573	454	116481	0.00389763	480	0.832745	-8.29579	0.210848	-0.0224473	0.390172
28S-1042	G	171	153832	0.0011116	187	115566	0.00161812	179	0.68697	-0.386866	1.41326	-0.0411289	0.146961
28S-1043	A	136	152619	0.000891108	157	115510	0.00135919	146.5	0.655617	-0.256817	1.5595	-0.0411921	0.11825
28S-1044	G	141	151229	0.000932361	118	114626	0.00102943	129.5	0.905702	-4.33346	0.367491	-0.0110294	0.372893
28S-1045	C	315	149185	0.00211147	312	113198	0.00275623	313.5	0.766072	-1.15738	0.90851	-0.0379671	0.264045
28S-1046	U	83	145690	0.000569703	84	111246	0.000755083	83.5	0.75449	-2.64033	0.538413	-0.0232135	0.345113
28S-1047	U	125	143018	0.000874016	137	110312	0.00124193	131	0.703755	-0.828793	1.07175	-0.0334491	0.22464
28S-1048	G	133	143353	0.00092778	148	110185	0.0013432	140.5	0.690726	-0.606355	1.22015	-0.0364733	0.189508
28S-1049	G	150	142474	0.00105282	137	109825	0.00124744	143.5	0.843988	-54.8543	0.0350913	-0.0170969	0.398697
28S-1050	U	101	141105	0.000715779	60	108476	0.000553118	80.5	1.29408	-0.0495722	1.86743	0.00660514	0.0697679
28S-1051	A	56	140248	0.000399293	53	104770	0.00050587	54.5	0.789319	-6.29962	0.268507	-0.0193483	0.384817
28S-1052	U	68	136127	0.000499534	61	99375	0.000613836	64.5	0.813789	-10.5599	0.169551	-0.0185424	0.393249
28S-1053	A	165	134519	0.00122659	127	96339	0.00131826	146	0.930462	-2.55323	0.551611	-0.006425	0.34264
28S-1054	G	259	133106	0.00194582	248	94271	0.00263071	253.5	0.739654	-0.790909	1.09442	-0.0435165	0.219191
28S-1055	G	526	131476	0.00400073	448	92970	0.00481876	487	0.830241	-6.99367	0.245194	-0.0249823	0.387129
28S-1056	G	234	131197	0.00178358	197	93260	0.00211237	215.5	0.844347	-48.2469	0.0397995	-0.0174288	0.398626
28S-1057	G	653	128801	0.00506984	469	89998	0.00521123	561	0.972868	-0.222221	1.60364	0.0441254	0.110276
28S-1058	C	336	127307	0.00263929	288	87024	0.00330943	312	0.797505	-2.5634	0.550036	-0.0325038	0.342937
28S-1059	G	278	122734	0.00226506	188	81017	0.0023205	233	0.976109	-0.856756	1.0556	0.0111934	0.22853
28S-1060	A	67	119764	0.000559434	46	76551	0.000600907	56.5	0.930983	-4.70833	0.343358	-0.0118866	0.376105
28S-1061	A	48	118229	0.000405992	38	72974	0.000520733	43	0.779654	-6.07806	0.276912	-0.0199042	0.383936
28S-1062	A	93	115631	0.000804283	55	69643	0.000789742	74	1.01841	-1.54544	0.770005	-0.00394798	0.296594
28S-1063	G	61	114189	0.000534202	74	68715	0.00107691	67.5	0.49605	0.0991409	2.1757	-0.0522041	0.0374116
28S-1064	A	1032	112499	0.00917341	649	67406	0.00962822	840.5	0.952763	-0.189131	1.64826	0.0773461	0.102558
28S-1065	C	195	113957	0.00171117	158	68755	0.00229801	176.5	0.74463	-1.2708	0.863134	-0.0390278	0.274875
28S-1066	U	99	111766	0.000885779	56	67584	0.000828598	77.5	1.06901	-0.967373	0.996252	0.000607364	0.242878
28S-1067	A	99	110954	0.000892262	52	65111	0.000798636	75.5	1.11723	-0.680437	1.16636	0.00360477	0.20207
28S-1068	A	43	110454	0.000389302	28	67407	0.000415387	35.5	0.937204	-5.73732	0.290917	-0.013073	0.382413
28S-1069	U	67	110374	0.000607027	62	69165	0.000896407	64.5	0.677178	-1.17422	0.901475	-0.0309752	0.265732
28S-1070	C	426	111535	0.00381943	379	69999	0.00541436	402.5	0.705425	-0.0622454	1.84515	-0.0894905	0.0727138
28S-1071	G	427	108099	0.00395008	290	67793	0.00427773	358.5	0.923407	-1.48869	0.787563	0.0133937	0.292566
28S-1072	A	79	104072	0.00075909	42	64360	0.000652579	60.5	1.16321	-0.63322	1.20008	0.00274303	0.194167
28S-1073	A	93	104106	0.00089332	78	64318	0.00121272	85.5	0.736623	-2.01007	0.651147	-0.0293078	0.322732
28S-1074	C	339	105160	0.00322366	286	65899	0.00433997	312.5	0.742783	-0.671516	1.17259	-0.0597847	0.200604
28S-1075	C	180	107662	0.0016719	155	68817	0.00225235	167.5	0.742291	-1.26975	0.863533	-0.0390753	0.27478
28S-1076	A	98	105447	0.000929377	85	68064	0.00124882	91.5	0.744201	-2.12958	0.626281	-0.0287999	0.327898
28S-1077	U	277	107242	0.00258294	243	72398	0.00335645	260	0.769547	-1.4856	0.788541	-0.0415432	0.29234
28S-1078	C	224	110035	0.00203572	247	75208	0.00328423	235.5	0.619847	0.183569	2.40069	-0.0871738	0.0223573
28S-1079	U	86	108954	0.000789324	59	76190	0.00077438	72.5	1.0193	-1.53635	0.772765	-0.004128	0.295963
28S-1080	A	63	114011	0.000552578	49	84587	0.000579285	56	0.953897	-3.50958	0.434631	-0.0108066	0.362986
28S-1081	G	94	116852	0.000804436	95	91800	0.00103486	94.5	0.77734	-3.57833	0.428103	-0.0234747	0.36401
28S-1082	U	99	117730	0.000840907	79	93233	0.000847339	89	0.992409	-1.66769	0.734717	-0.00510049	0.304573
28S-1083	A	54	119729	0.000451019	66	95228	0.000693073	60	0.650751	-0.909119	1.02665	-0.0294152	0.235523
28S-1084	G	110	118056	0.000931761	114	94952	0.00120061	112	0.776075	-3.12858	0.47474	-0.0247319	0.356426
28S-1085	C	238	117264	0.00202961	249	94824	0.00262592	243.5	0.772914	-1.67823	0.731828	-0.0352656	0.305219
28S-1086	U	139	114585	0.00121307	131	93826	0.0013962	135	0.868838	-13.5734	0.134491	-0.0139081	0.395351
28S-1087	G	131	114412	0.00114498	108	93873	0.00115049	119.5	0.995214	-1.2599	0.867295	-0.000713446	0.273887
28S-1088	G	145	114176	0.00126997	132	94307	0.00139968	138.5	0.907326	-4.01099	0.39114	-0.00884282	0.369563
28S-1089	U	81	114345	0.000708383	72	94427	0.000762494	76.5	0.929034	-3.97513	0.393959	-0.0107813	0.369154
28S-1090	U	92	113278	0.000812161	106	93273	0.00113645	99	0.714648	-1.29072	0.855627	-0.0308483	0.276654
28S-1091	C	596	113659	0.00524376	683	93036	0.00734124	639.5	0.714287	0.101356	2.18106	-0.109352	0.0369771
28S-1092	C	546	114223	0.00478012	665	95074	0.00699455	605.5	0.683407	0.263949	2.66286	-0.125251	0.0115122
28S-1093	U	452	114789	0.00393766	516	97624	0.00528559	484	0.744981	-0.36511	1.43578	-0.0681215	0.142321
28S-1094	C	992	117012	0.00847776	940	102431	0.00917691	966	0.923815	-0.492869	1.31291	0.0479995	0.168503
28S-1095	C	453	118775	0.00381393	585	109115	0.00536132	519	0.71138	0.0237363	2.00765	-0.0857775	0.0531692
28S-1096	C	332	119344	0.00278187	472	112074	0.0042115	402	0.660542	0.216371	2.50119	-0.0910292	0.0174764
28S-1097	G	645	120429	0.00535585	603	114924	0.00524695	624	1.02076	0.147068	2.29796	0.0681367	0.0284605
28S-1098	A	69	121228	0.000569175	55	116474	0.000472208	62	1.20535	-0.427555	1.37298	-0.000711638	0.155444
28S-1099	A	74	121025	0.000611444	107	116077	0.000921802	90.5	0.663314	-0.680654	1.16621	-0.0325849	0.202106
28S-1100	G	108	120982	0.000892695	127	115910	0.00109568	117.5	0.814742	-7.80792	0.222527	-0.0200353	0.389186
28S-1101	U	454	119977	0.00378406	907	115117	0.00787894	680.5	0.480275	0.730307	7.26751	-0.289293	1.35491e-12
28S-1102	U	103	120578	0.000854219	175	115331	0.00151737	139	0.56296	0.180034	2.39034	-0.0572668	0.0229186
28S-1103	U	241	120400	0.00200166	469	115484	0.00406117	355	0.492878	0.609457	5.01865	-0.152311	1.35411e-06
28S-1104	C	1937	120053	0.0161345	2236	116023	0.019272	2086.5	0.837199	-5.1668	0.317831	-0.037784	0.379293
28S-1105	C	662	119359	0.00554629	787	118437	0.00664488	724.5	0.834671	-7.60613	0.227745	-0.0254263	0.388729
28S-1106	C	614	119831	0.00512388	903	120244	0.00750973	758.5	0.682299	0.343892	2.98731	-0.134041	0.00460343
28S-1107	U	166	121952	0.00136119	231	126137	0.00183134	198.5	0.743275	-1.10597	0.930688	-0.0346892	0.258715
28S-1108	C	975	126218	0.00772473	1735	132733	0.0130714	1355	0.590966	0.701368	6.56327	-0.333189	1.76595e-10
28S-1109	A	166	127662	0.00130031	218	135339	0.00161077	192	0.807259	-4.64854	0.346992	-0.022822	0.375634
28S-1110	G	138	130795	0.00105509	202	143749	0.00140523	170	0.75083	-1.46987	0.793565	-0.0294637	0.291181
28S-1111	G	135	130938	0.00103102	177	144059	0.00122866	156	0.839141	-26.179	0.0721144	-0.0176474	0.397906
28S-1112	A	47	130898	0.000359058	71	143587	0.000494474	59	0.726142	-2.2984	0.594227	-0.0222181	0.334375
28S-1113	U	55	132239	0.000415914	79	144276	0.000547562	67	0.759574	-3.34062	0.451548	-0.0211113	0.360275
28S-1114	A	74	132551	0.000558276	76	143047	0.000531294	75	1.05079	-1.13188	0.919378	-0.00644562	0.261436
28S-1115	G	140	130658	0.0010715	194	139944	0.00138627	167	0.772938	-2.25602	0.601962	-0.0264109	0.332832
28S-1116	C	451	129912	0.00347158	609	138799	0.00438764	530	0.791218	-1.43275	0.805673	-0.0403032	0.288375
28S-1117	U	283	128456	0.00220309	297	137182	0.00216501	290	1.01759	-0.275577	1.53656	0.0177701	0.122524
28S-1118	G	184	128320	0.00143392	215	136268	0.00157777	199.5	0.908822	-3.08879	0.47936	-0.00764486	0.355642
28S-1119	G	822	128104	0.00641666	886	135674	0.00653036	854	0.982589	0.0790492	2.12824	0.0654371	0.0414349
28S-1120	C	546	120065	0.00454754	720	120632	0.00596857	633	0.761915	-0.446756	1.35476	-0.0652986	0.159355
28S-1121	A	165	119524	0.00138048	140	118426	0.00118217	152.5	1.16774	-5.36194e-05	1.95989	0.0188749	0.058453
28S-1122	C	265	117305	0.00225907	419	115096	0.00364044	342	0.620548	0.316979	2.8696	-0.0945977	0.00649806
28S-1123	U	92	116495	0.000789733	93	113051	0.000822638	92.5	0.960002	-2.32024	0.590319	-0.00793675	0.33515
28S-1124	C	560	115585	0.00484492	720	110303	0.00652747	640	0.742235	-0.157152	1.69381	-0.0819298	0.0950416
28S-1125	A	132	115894	0.00113897	141	109758	0.00128464	136.5	0.886605	-6.73851	0.253279	-0.0119731	0.386349
28S-1126	A	165	114243	0.00144429	170	107535	0.00158088	167.5	0.913598	-3.13045	0.474524	-0.00691835	0.356463
28S-1127	G	403	113527	0.00354982	441	106581	0.0041377	422	0.857921	-17.1732	0.107851	-0.0130305	0.396629
28S-1128	C	322	112090	0.00287269	368	103885	0.00354238	345	0.81095	-3.61341	0.424849	-0.0291568	0.364515
28S-1129	A	76	110229	0.000689474	38	99422	0.000382209	57	1.80392	0.292647	2.7709	0.0177601	0.00858388
28S-1130	A	51	107486	0.00047448	66	93711	0.000704293	58.5	0.673697	-1.22373	0.881403	-0.0281064	0.270529
28S-1131	A	138	103760	0.00132999	107	86528	0.00123659	122.5	1.07553	-0.501949	1.30497	0.00979563	0.170263
28S-1132	G	159	101493	0.00156661	170	82313	0.00206529	164.5	0.758544	-1.71575	0.721715	-0.0340496	0.307471
28S-1133	G	179	100222	0.00178604	137	80192	0.0017084	158	1.04544	-0.502938	1.30411	0.0150077	0.170453
28S-1134	A	78	98248	0.000793909	61	77064	0.00079155	69.5	1.00298	-1.82825	0.693007	-0.00506623	0.313779
28S-1135	G	134	95885	0.00139751	91	73032	0.00124603	112.5	1.12157	-0.336418	1.46661	0.0153836	0.136094
28S-1136	A	84	93163	0.000901646	51	69756	0.00073112	67.5	1.23324	-0.292604	1.51632	0.00986851	0.126369
28S-1137	C	262	91929	0.00285003	271	67179	0.004034	266.5	0.706501	-0.310123	1.49604	-0.0704783	0.130288
28S-1138	G	252	89836	0.00280511	236	64329	0.00366864	244	0.764619	-1.40381	0.815372	-0.0455689	0.286117
28S-1139	G	258	87953	0.00293338	235	61856	0.00379915	246.5	0.772117	-1.63893	0.742726	-0.0439274	0.302777
28S-1140	G	159	87592	0.00181523	120	61144	0.00196258	139.5	0.924922	-2.89181	0.503621	-0.00251412	0.351426
28S-1141	A	72	86545	0.000831937	56	59354	0.000943492	64	0.881764	-11.9837	0.150959	-0.0136083	0.394422
28S-1142	G	54	84814	0.000636687	48	57122	0.000840307	51	0.757684	-3.8458	0.404474	-0.0237174	0.367608
28S-1143	U	91	84058	0.00108259	59	57095	0.00103337	75	1.04763	-1.17374	0.901673	0.00276434	0.265685
28S-1144	C	196	83572	0.00234528	128	55823	0.00229296	162	1.02282	-0.669484	1.17402	0.0209222	0.200269
28S-1145	U	178	81848	0.00217476	116	54749	0.00211876	147	1.02643	-0.720103	1.13947	0.018797	0.208434
28S-1146	C	288	81505	0.00353353	187	54406	0.00343712	237.5	1.02805	-0.342366	1.46011	0.0412912	0.137395
28S-1147	A	68	81286	0.000836552	61	55021	0.00110867	64.5	0.754557	-3.15693	0.471502	-0.0263431	0.356973
28S-1148	U	311	79851	0.00389475	202	55034	0.00367046	256.5	1.06111	-0.107707	1.76942	0.0566108	0.0833787
28S-1149	C	560	80523	0.00695453	508	56293	0.00902421	534	0.770653	-0.758077	1.11485	-0.0828683	0.214298
28S-1150	C	354	79584	0.00444813	421	56049	0.00751128	387.5	0.592193	0.443889	3.52448	-0.197622	0.000800792
28S-1151	G	186	80690	0.00230512	179	58946	0.00303668	182.5	0.759092	-1.59808	0.754403	-0.0421401	0.300142
28S-1152	G	177	79069	0.00223855	170	58015	0.00293028	173.5	0.763938	-1.82503	0.693798	-0.0399087	0.313607
28S-1153	U	68	77363	0.000878973	70	57177	0.00122427	69	0.717958	-1.82096	0.6948	-0.0315754	0.313388
28S-1154	A	24	75413	0.000318248	13	54290	0.000239455	18.5	1.32905	-1.06879	0.947412	-0.00571981	0.254684
28S-1155	A	26	71424	0.000364023	26	50388	0.000515996	26	0.705477	-3.16453	0.470641	-0.0234676	0.357118
28S-1156	A	63	70080	0.000898973	58	49493	0.00117188	60.5	0.767118	-3.98472	0.393201	-0.0255211	0.369264
28S-1157	G	104	69670	0.00149275	109	48982	0.00222531	106.5	0.670807	-0.61836	1.2111	-0.0537425	0.191604
28S-1158	C	287	68279	0.00420334	256	48223	0.00530867	271.5	0.791788	-2.42182	0.572794	-0.0450125	0.338583
28S-1159	G	176	66921	0.00262997	128	47088	0.00271831	152	0.967499	-1.44638	0.801184	0.0137459	0.289417
28S-1160	A	36	65134	0.000552707	19	45735	0.000415437	27.5	1.33042	-0.695509	1.15599	0.0022678	0.204518
28S-1161	A	38	63895	0.000594726	23	44395	0.000518076	30.5	1.14795	-1.38112	0.823142	-0.00196899	0.284302
28S-1162	U	35	62940	0.000556085	26	43967	0.000591353	30.5	0.940361	-5.97811	0.280878	-0.0114393	0.383512
28S-1163	G	90	63817	0.00141028	68	43973	0.0015464	79	0.911976	-5.19124	0.316576	-0.00736326	0.379444
28S-1164	A	85	61515	0.00138178	78	41525	0.00187839	81.5	0.735619	-2.0423	0.644249	-0.0365065	0.324176
28S-1165	U	30	59646	0.000502968	31	39747	0.000779933	30.5	0.644885	-1.59535	0.755197	-0.0314615	0.299962
28S-1166	U	42	59522	0.000705621	42	38673	0.00108603	42	0.649726	-1.27507	0.861511	-0.0368335	0.27526
28S-1167	A	59	57509	0.00102593	35	35834	0.000976726	47	1.05037	-1.72703	0.718731	0.00195906	0.308132
28S-1168	G	91	57102	0.00159364	65	35780	0.00181666	78	0.877237	-12.6686	0.143394	-0.0116901	0.394862
28S-1169	A	44	56407	0.000780045	42	34569	0.00121496	43	0.642033	-1.15766	0.90839	-0.0401234	0.264074
28S-1170	G	64	55514	0.00115286	71	32737	0.0021688	67.5	0.531567	-0.0325264	1.89826	-0.0811555	0.0658334
28S-1171	G	95	55057	0.00172548	56	32093	0.00174493	75.5	0.988857	-2.01064	0.651024	0.00640942	0.322757
28S-1172	C	356	54638	0.00651561	258	31007	0.0083207	307	0.78306	-1.80671	0.698327	-0.0680007	0.312619
28S-1173	C	317	54142	0.00585497	233	29993	0.00776848	275	0.753683	-1.01513	0.972641	-0.0860146	0.248589
28S-1174	U	84	54096	0.0015528	54	29957	0.00180258	69	0.861427	-31.9155	0.0595465	-0.0144036	0.398236
28S-1175	U	195	56208	0.00346926	129	32567	0.00396106	162	0.875839	-9.02057	0.195598	-0.00651394	0.391383
28S-1176	G	101	57359	0.00176084	102	34738	0.00293627	101.5	0.599687	-0.130166	1.73426	-0.0852464	0.088676
28S-1177	G	123	57179	0.00215114	101	34834	0.00289947	112	0.741909	-1.77165	0.707161	-0.045661	0.310685
28S-1178	G	79	57133	0.00138274	64	34527	0.00185362	71.5	0.745966	-2.61693	0.541896	-0.0344419	0.344464
28S-1179	G	292	56834	0.00513777	171	33992	0.0050306	231.5	1.0213	-0.417956	1.38227	0.0649051	0.153466
28S-1180	C	399	56976	0.00700295	256	33714	0.00759328	327.5	0.922256	-1.65321	0.738729	0.0357547	0.303674
28S-1181	C	120	58199	0.00206189	63	34438	0.00182937	91.5	1.1271	-0.478702	1.32549	0.031268	0.16573
28S-1182	G	227	59308	0.00382748	129	35172	0.00366769	178	1.04357	-0.450351	1.3514	0.0505137	0.160081
28S-1183	U	92	59772	0.00153918	71	35647	0.00199175	81.5	0.772778	-3.66548	0.420106	-0.0307629	0.365246
28S-1184	A	65	63261	0.00102749	27	37588	0.000718314	46	1.43042	-0.148773	1.70617	0.022707	0.0930663
28S-1185	A	107	64641	0.0016553	45	38380	0.00117249	76	1.41178	0.0840051	2.13975	0.0454547	0.0404292
28S-1186	C	415	68375	0.00606947	354	40165	0.00881364	384.5	0.688645	0.0350119	2.03111	-0.149195	0.0507092
28S-1187	G	173	69972	0.00247242	109	41057	0.00265485	141	0.931285	-2.62129	0.541243	0.00401084	0.344586
28S-1188	G	305	70132	0.00434894	188	40903	0.00459624	246.5	0.946196	-1.33995	0.837625	0.0254568	0.280903
28S-1189	C	142	70707	0.00200829	104	41021	0.00253529	123	0.792134	-4.16487	0.379486	-0.0300425	0.371226
28S-1190	C	143	71188	0.00200877	89	41002	0.00217063	116	0.925432	-3.28947	0.456933	-0.000926103	0.359395
28S-1191	U	88	72196	0.0012189	56	41602	0.00134609	72	0.905515	-6.27585	0.269384	-0.00936547	0.384727
28S-1192	C	136	74384	0.00182835	77	42874	0.00179596	106.5	1.01803	-1.13341	0.918718	0.0120008	0.261594
28S-1193	A	56	74059	0.000756154	48	42890	0.00111914	52	0.675655	-1.40706	0.814272	-0.0347281	0.286374
28S-1194	A	109	75927	0.00143559	75	44167	0.0016981	92	0.845409	-98.0435	0.0197893	-0.0170804	0.398864
28S-1195	C	251	78380	0.00320235	188	45603	0.00412254	219.5	0.776791	-2.01349	0.650408	-0.0444513	0.322887
28S-1196	C	160	80711	0.00198238	147	46705	0.00314741	153.5	0.629844	-0.0717835	1.82873	-0.0812754	0.0749405
28S-1197	U	69	81284	0.000848876	29	46933	0.000617902	49	1.3738	-0.206331	1.62476	0.013939	0.10658
28S-1198	A	71	84558	0.00083966	46	48935	0.000940022	58.5	0.893234	-9.23216	0.191553	-0.0126065	0.39169
28S-1199	U	380	85662	0.00443604	176	49790	0.00353485	278	1.25495	0.380276	3.1627	0.118252	0.00268447
28S-1200	U	84	84880	0.000989632	74	49342	0.00149974	79	0.659871	-0.769327	1.10777	-0.0431447	0.215993
28S-1201	C	255	86064	0.00296291	223	49265	0.00452654	239	0.654564	0.0134783	1.98678	-0.099144	0.0554329
28S-1202	U	150	86602	0.00173206	128	50631	0.0025281	139	0.685125	-0.567002	1.2508	-0.0554087	0.182467
28S-1203	C	830	91374	0.00908355	679	53521	0.0126866	754.5	0.715995	0.153353	2.31501	-0.174914	0.0273625
28S-1204	A	83	93918	0.00088375	39	56007	0.000696342	61	1.26913	-0.28393	1.52656	0.0109606	0.124415
28S-1205	A	38	106785	0.000355855	29	72016	0.000402688	33.5	0.883699	-15.9785	0.11544	-0.0152015	0.396293
28S-1206	A	85	108690	0.000782041	83	73536	0.0011287	84	0.692869	-1.11389	0.927202	-0.033059	0.259554
28S-1207	C	563	110368	0.00510112	617	74696	0.00826015	590	0.617558	0.490044	3.84347	-0.196004	0.000247261
28S-1208	U	86	110379	0.000779134	80	75048	0.00106598	83	0.730905	-1.88458	0.679475	-0.0283323	0.316706
28S-1209	U	316	114842	0.00275161	435	81106	0.00536335	375.5	0.513039	0.5941	4.82878	-0.185699	3.44881e-06
28S-1210	U	87	121822	0.000714157	70	90267	0.000775477	78.5	0.920925	-4.45192	0.359506	-0.0112742	0.373977
28S-1211	C	967	132888	0.0072768	895	106856	0.00837576	931	0.868794	-4.56286	0.352337	-0.000908897	0.374933
28S-1212	A	166	144436	0.0011493	160	127114	0.00125871	163	0.913074	-3.21767	0.464712	-0.00893611	0.358109
28S-1213	A	154	171913	0.000895802	129	180019	0.000716591	141.5	1.25009	0.14258	2.28593	0.010478	0.029256
28S-1214	U	164	177884	0.000921949	215	184137	0.00116761	189.5	0.789604	-2.94846	0.496396	-0.0230227	0.352698
28S-1215	G	324	182364	0.00177667	442	186570	0.00236908	383	0.749938	-0.624082	1.20684	-0.0385432	0.192595
28S-1216	G	383	182588	0.00209762	454	186816	0.0024302	418.5	0.863147	-10.5908	0.1691	-0.0132759	0.393279
28S-1217	G	327	185153	0.00176611	425	188632	0.00225306	376	0.783869	-1.54562	0.76995	-0.0302855	0.296606
28S-1218	U	187	187320	0.000998292	192	190646	0.0010071	189.5	0.991252	-0.842304	1.06388	-0.00305767	0.226533
28S-1219	G	525	192523	0.00272695	526	194705	0.00270152	525.5	1.00941	0.0097328	1.97926	0.0241916	0.0562651
28S-1220	A	235	192705	0.00121948	226	195350	0.0011569	230.5	1.0541	-0.19651	1.6381	0.00577139	0.104286
28S-1221	G	196	198138	0.00098921	288	199401	0.00144433	242	0.684894	-0.182108	1.65805	-0.0387669	0.100911
28S-1222	A	115	199834	0.000575478	127	200224	0.00063429	121	0.907279	-4.37439	0.364692	-0.0130413	0.373275
28S-1223	U	119	202755	0.000586915	149	202224	0.000736807	134	0.796566	-4.33426	0.367436	-0.0201401	0.372901
28S-1224	G	320	205448	0.00155757	324	204162	0.00158698	322	0.981472	-0.509037	1.29884	0.00323371	0.171627
28S-1225	C	1976	205462	0.00961735	2295	204113	0.0112438	2135.5	0.855349	-10.324	0.173083	-0.00976041	0.393011
28S-1226	C	510	206447	0.00247037	623	205346	0.0030339	566.5	0.814254	-2.95802	0.495197	-0.026401	0.352908
28S-1227	U	148	207243	0.000714138	213	206514	0.00103141	180.5	0.692392	-0.440749	1.3604	-0.0316793	0.158138
28S-1228	U	419	212068	0.00197578	826	211091	0.003913	622.5	0.504927	0.691173	6.3466	-0.14293	7.1509e-10
28S-1229	G	357	215021	0.0016603	437	215350	0.00202925	397	0.818184	-4.34555	0.36666	-0.0223786	0.373007
28S-1230	C	1559	215781	0.00722492	1794	217022	0.00826644	1676.5	0.874006	-2.29968	0.593998	0.00293343	0.334421
28S-1231	C	934	219225	0.00426046	1156	218900	0.00528095	1045	0.806761	-1.3863	0.821356	-0.0374386	0.284719
28S-1232	G	720	214618	0.0033548	667	213515	0.0031239	693.5	1.07391	0.364903	3.08615	0.049478	0.00340986
28S-1233	A	280	215872	0.00129706	321	213236	0.00150537	300.5	0.861623	-14.2939	0.128155	-0.0147242	0.39568
28S-1234	C	634	219542	0.00288783	835	214112	0.00389983	734.5	0.740502	-0.0624758	1.84475	-0.0562318	0.0727675
28S-1235	C	450	228722	0.00196745	716	220408	0.00324852	583	0.605646	0.514423	4.03644	-0.0907376	0.000115602
28S-1236	G	934	228738	0.00408327	935	218043	0.00428814	934.5	0.952224	-0.118264	1.75272	0.0250708	0.0858678
28S-1237	U	390	228830	0.00170432	403	219130	0.00183909	396.5	0.92672	-1.2485	0.871691	-0.00308469	0.272842
28S-1238	G	324	232508	0.0013935	364	217974	0.00166992	344	0.834469	-11.2966	0.159394	-0.0187865	0.393906
28S-1239	G	341	232281	0.00146805	376	215350	0.00174599	358.5	0.84081	-20.501	0.0911584	-0.0178504	0.397288
28S-1240	U	199	231934	0.000858003	215	214576	0.00100198	207	0.856311	-30.5871	0.0620507	-0.0158231	0.398175
28S-1241	G	359	236255	0.00151954	318	212706	0.00149502	338.5	1.0164	-0.185123	1.65384	0.00699346	0.101619
28S-1242	U	219	235053	0.000931705	195	207979	0.000937595	207	0.993718	-0.732236	1.13149	-0.00376933	0.210332
28S-1243	U	319	241493	0.00132095	463	209659	0.00220835	391	0.598162	0.429914	3.43808	-0.0685239	0.0010818
28S-1244	G	434	242430	0.00179021	444	198869	0.00223263	439	0.80184	-2.27745	0.598026	-0.0263929	0.333619
28S-1245	U	157	248694	0.000631298	143	206001	0.000694171	150	0.909427	-3.6532	0.421215	-0.0125733	0.365076
28S-1246	U	260	258929	0.00100414	300	206661	0.00145165	280	0.691719	-0.145753	1.71066	-0.0379493	0.0923541
28S-1247	A	703	264397	0.00265888	495	202528	0.00244411	599	1.08787	0.350387	3.01718	0.0383215	0.00420861
28S-1248	G	239	263110	0.000908365	252	197750	0.00127434	245.5	0.712814	-0.433781	1.36701	-0.0328068	0.156719
28S-1249	C	1567	268747	0.00583076	1656	199011	0.00832115	1611.5	0.700716	0.490108	3.84395	-0.132348	0.000246802
28S-1250	G	834	269107	0.00309914	736	195594	0.0037629	785	0.823605	-3.62509	0.423776	-0.0254721	0.364681
28S-1251	G	1582	267805	0.00590728	1159	192042	0.00603514	1370.5	0.978815	0.252213	2.62107	0.0570832	0.0128561
28S-1252	C	381	271292	0.00140439	318	191819	0.00165781	349.5	0.847135	-97.1865	0.019962	-0.0167983	0.398863
28S-1253	A	153	278911	0.000548562	106	193431	0.000547999	129.5	1.00103	-1.10576	0.930779	-0.00868956	0.258693
28S-1254	A	199	284221	0.000700159	148	193610	0.000764423	173.5	0.915931	-2.942	0.497209	-0.0117074	0.352556
28S-1255	G	311	295556	0.00105225	316	196807	0.00160563	313.5	0.655351	0.140286	2.27983	-0.0457065	0.0296662
28S-1256	G	459	298408	0.00153816	396	197315	0.00200694	427.5	0.766421	-0.862725	1.05222	-0.0320697	0.229346
28S-1257	A	1106	300314	0.00368281	1694	197919	0.00855906	1400	0.430282	0.842866	12.4735	-0.353021	6.54035e-35
28S-1258	U	177	305237	0.000579877	210	201085	0.00104433	193.5	0.55526	0.330503	2.92757	-0.0453178	0.00549304
28S-1259	U	161	310742	0.000518115	112	205653	0.000544607	136.5	0.951356	-1.97042	0.65984	-0.0112783	0.320898
28S-1260	U	381	313878	0.00121385	357	209230	0.00170626	369	0.71141	-0.159654	1.69016	-0.0385536	0.095631
28S-1261	C	2209	320684	0.0068884	2099	219202	0.00957564	2154	0.719367	0.488225	3.82981	-0.13304	0.000260564
28S-1262	G	634	322152	0.00196802	612	221524	0.00276268	623	0.712357	0.101632	2.18173	-0.0519527	0.0369231
28S-1263	G	849	323042	0.00262814	769	221688	0.00346884	809	0.757643	-0.215305	1.61276	-0.046259	0.10867
28S-1264	A	210	324835	0.000646482	175	222364	0.000786998	192.5	0.821453	-7.61465	0.227519	-0.0185477	0.388749
28S-1265	U	382	325205	0.00117464	288	221571	0.00129981	335	0.903705	-2.4459	0.568792	-0.00983227	0.339358
28S-1266	C	789	320478	0.00246195	805	214917	0.00374563	797	0.657285	0.454729	3.59454	-0.0839322	0.00062404
28S-1267	C	993	316224	0.00314018	865	210609	0.00410714	929	0.764566	-0.233998	1.58833	-0.0490617	0.113003
28S-1268	G	1468	315600	0.00465146	1000	211087	0.00473738	1234	0.981862	0.226201	2.53296	0.0426127	0.0161333
28S-1269	A	183	314858	0.000581214	155	210637	0.000735863	169	0.78984	-3.197	0.467	-0.0206002	0.357728
28S-1270	G	243	313066	0.000776194	229	208677	0.00109739	236	0.707309	-0.404171	1.39584	-0.031112	0.1506
28S-1271	U	185	312538	0.000591928	148	207442	0.000713452	166.5	0.829667	-12.2923	0.147454	-0.0178075	0.394629
28S-1272	G	438	306851	0.0014274	349	199824	0.00174654	393.5	0.817276	-4.22832	0.374881	-0.0217106	0.371872
28S-1273	C	2763	306214	0.0090231	2014	197898	0.010177	2388.5	0.886621	-0.861935	1.05267	0.0194842	0.229238
28S-1274	C	814	302600	0.00269002	634	193204	0.00328151	724	0.819752	-3.19179	0.467581	-0.0255135	0.357631
28S-1275	C	808	302201	0.00267372	710	192275	0.00369263	759	0.724069	0.100169	2.17819	-0.05982	0.0372097
28S-1276	A	203	300620	0.000675271	162	190913	0.000848554	182.5	0.79579	-3.51843	0.433779	-0.0207516	0.36312
28S-1277	G	356	300437	0.00118494	305	190716	0.00159924	330.5	0.740941	-0.594723	1.22905	-0.0327363	0.187453
28S-1278	U	193	298197	0.000647223	161	189806	0.000848235	177	0.763024	-1.77894	0.705305	-0.02336	0.311092
28S-1279	G	361	295867	0.00122014	417	186271	0.00223867	389	0.545029	0.546898	4.32573	-0.0804079	3.44871e-05
28S-1280	G	411	295542	0.00139067	341	185789	0.00183542	376	0.757684	-0.789912	1.09503	-0.0322461	0.219045
28S-1281	G	1706	295482	0.00577362	1186	185588	0.0063905	1446	0.903469	-0.672661	1.17179	0.016201	0.200793
28S-1282	C	2146	295269	0.00726795	1548	185806	0.00833127	1847	0.87237	-2.38201	0.579537	0.00180616	0.33727
28S-1283	C	362	286481	0.00126361	322	183746	0.00175242	342	0.721066	-0.305921	1.50086	-0.0375609	0.129351
28S-1284	A	184	285069	0.000645458	169	182790	0.000924558	176.5	0.698126	-0.517446	1.29164	-0.0296105	0.173234
28S-1285	C	439	282706	0.00155285	402	182029	0.00220844	420.5	0.703144	-0.0202887	1.92102	-0.0467542	0.0630324
28S-1286	U	204	281674	0.000724241	193	181449	0.00106366	198.5	0.680896	-0.268693	1.5449	-0.0333017	0.12096
28S-1287	U	2007	282553	0.00710309	3595	183142	0.0196296	2801	0.361857	0.910524	21.9054	-0.9144	2.53112e-105
28S-1288	U	192	281077	0.000683087	155	184517	0.000840031	173.5	0.813169	-5.94956	0.282032	-0.0193382	0.383387
28S-1289	U	672	279086	0.00240786	745	191558	0.00388916	708.5	0.619121	0.531076	4.17979	-0.100454	6.41527e-05
28S-1290	G	333	277302	0.00120086	290	191817	0.00151186	311.5	0.794292	-2.34844	0.585347	-0.0242757	0.336131
28S-1291	G	356	277313	0.00128375	330	194954	0.00169271	343	0.758399	-0.881565	1.04169	-0.0309093	0.23189
28S-1292	U	202	276227	0.000731283	163	194324	0.000838805	182.5	0.871814	-9.95907	0.178847	-0.0147146	0.392613
28S-1293	A	144	272997	0.000527478	106	189295	0.000559973	125	0.941972	-2.39143	0.577927	-0.011624	0.337585
28S-1294	A	166	260935	0.000636174	119	178032	0.000668419	142.5	0.951759	-1.89202	0.677728	-0.0100624	0.317082
28S-1295	G	389	257319	0.00151174	372	175646	0.0021179	380.5	0.713794	-0.163131	1.68511	-0.0433961	0.09645
28S-1296	C	790	254637	0.00310246	714	173104	0.00412469	752	0.752167	-0.18535	1.65352	-0.0540034	0.101672
28S-1297	A	2722	247035	0.0110187	1824	165876	0.0109962	2273	1.00205	0.499628	3.91708	0.141574	0.000185824
28S-1298	G	274	246942	0.00110957	181	167413	0.00108116	227.5	1.02628	-0.382737	1.41748	0.00148838	0.146086
28S-1299	A	109	240116	0.000453947	89	162076	0.000549125	99	0.826674	-13.8836	0.131689	-0.0176643	0.395498
28S-1300	A	103	232297	0.000443398	66	155035	0.00042571	84.5	1.04155	-1.10785	0.929856	-0.00881605	0.258915
28S-1301	C	824	229846	0.00358501	774	152836	0.00506425	799	0.707905	0.233267	2.5563	-0.0835925	0.0152028
28S-1302	U	223	223052	0.000999767	172	149542	0.00115018	197.5	0.869228	-10.884	0.164927	-0.0143255	0.393553
28S-1303	G	240	219062	0.00109558	217	147424	0.00147194	228.5	0.744308	-0.979329	0.990235	-0.0309799	0.244334
28S-1304	G	318	218126	0.00145787	242	148832	0.00162599	280	0.896604	-3.31267	0.454475	-0.00923937	0.359798
28S-1305	C	1572	216222	0.00727031	1239	146610	0.00845099	1405.5	0.86029	-6.91975	0.247483	-0.00751704	0.38691
28S-1306	G	473	213070	0.00221993	382	143503	0.00266197	427.5	0.833943	-9.68016	0.183518	-0.0202672	0.392281
28S-1307	C	546	209267	0.00260911	483	139334	0.00346649	514.5	0.752665	-0.442013	1.35921	-0.0478592	0.158395
28S-1308	U	179	204831	0.000873891	129	136120	0.000947693	154	0.922125	-2.84828	0.509318	-0.0100035	0.350414
28S-1309	G	272	197856	0.00137474	242	129009	0.00187584	257	0.732866	-0.671676	1.17248	-0.0369644	0.200631
28S-1310	U	230	192645	0.00119391	186	125641	0.00148041	208	0.806471	-4.32554	0.368038	-0.0224212	0.372818
28S-1311	G	336	189851	0.00176981	306	122802	0.00249182	321	0.710249	-0.233328	1.5892	-0.0489717	0.112848
28S-1312	G	386	186204	0.002073	296	118156	0.00250516	341	0.827489	-7.35267	0.234656	-0.0215645	0.388109
28S-1313	G	357	185867	0.00192073	257	116550	0.00220506	307	0.871054	-7.78414	0.22313	-0.0119387	0.389134
28S-1314	A	197	185444	0.00106232	123	115955	0.00106076	160	1.00147	-0.90064	1.03123	-0.00132285	0.234416
28S-1315	U	109	173954	0.000626602	73	107623	0.000678294	91	0.923792	-3.91947	0.398417	-0.0117484	0.368503
28S-1316	G	573	162199	0.0035327	294	96075	0.00306011	433.5	1.15444	0.372901	3.1255	0.0712696	0.00301752
28S-1317	A	181	147280	0.00122895	109	82813	0.00131622	145	0.933699	-2.48569	0.562298	-0.00604059	0.340606
28S-1318	A	158	135405	0.00116687	71	73476	0.000966302	114.5	1.20756	-0.0757292	1.82202	0.0160256	0.0758637
28S-1319	C	510	126593	0.00402866	315	67735	0.00465048	412.5	0.86629	-8.74375	0.201155	-0.00894377	0.390952
28S-1320	C	236	121930	0.00193554	188	63779	0.00294768	212	0.656631	-0.0666149	1.83759	-0.0697511	0.0737329
28S-1321	A	78	111757	0.000697943	47	56529	0.000831432	62.5	0.839447	-44.1379	0.0434225	-0.0172576	0.398566
28S-1322	A	46	102308	0.000449623	21	50218	0.000418177	33.5	1.0752	-1.97826	0.658103	-0.00763091	0.321265
28S-1323	A	108	94610	0.00114153	70	45102	0.00155204	89	0.735503	-1.97577	0.658653	-0.0330502	0.321149
28S-1324	U	35	88106	0.000397249	39	42127	0.000925772	37	0.4291	0.0267857	2.01394	-0.0530158	0.0525009
28S-1325	G	62	85772	0.000722847	35	39959	0.000875898	48.5	0.825264	-19.5458	0.0953969	-0.0184639	0.397131
28S-1326	U	139	82512	0.0016846	114	38453	0.00296466	126.5	0.568229	0.108345	2.19816	-0.094669	0.0356184
28S-1327	C	379	81037	0.00467688	189	36572	0.00516789	284	0.904988	-2.78587	0.517714	0.0106789	0.348906
28S-1328	C	350	75390	0.00464253	249	33732	0.00738171	299.5	0.628922	0.221293	2.51699	-0.169038	0.0167968
28S-1329	G	151	71261	0.00211897	78	32994	0.00236407	114.5	0.896325	-5.99487	0.280205	-0.00599855	0.383584
28S-1330	G	179	69216	0.00258611	76	32219	0.00235886	127.5	1.09634	-0.420758	1.37955	0.0382839	0.154045
28S-1331	U	53	68088	0.000778404	27	31581	0.000854944	40	0.910474	-8.18936	0.21329	-0.0115762	0.38997
28S-1332	U	41	63258	0.000648139	29	28061	0.00103346	35	0.627153	-1.25862	0.867786	-0.0380408	0.273771
28S-1333	A	50	60589	0.000825232	20	24895	0.000803374	35	1.02721	-2.68456	0.531949	-0.00306745	0.346309
28S-1334	A	42	57925	0.000725076	14	23836	0.000587347	28	1.23449	-1.12185	0.923722	0.00474932	0.260391
28S-1335	A	118	57037	0.00206883	54	23230	0.00232458	86	0.889981	-8.43258	0.20779	-0.00755899	0.390422
28S-1336	G	103	56866	0.00181128	72	23125	0.00311351	87.5	0.581747	-0.154347	1.69793	-0.0946407	0.0943806
28S-1337	C	273	56585	0.0048246	157	22763	0.00689716	215	0.699506	-0.443839	1.35749	-0.11331	0.158765
28S-1338	G	561	56249	0.00997351	210	22238	0.0094433	385.5	1.05615	0.0240123	2.00822	0.167223	0.0531086
28S-1339	C	149	55725	0.00267384	66	21916	0.0030115	107.5	0.887879	-7.92395	0.219634	-0.00550694	0.389435
28S-1340	C	100	56063	0.00178371	57	21993	0.00259173	78.5	0.68823	-1.21058	0.886647	-0.0556321	0.269278
28S-1341	A	88	56348	0.00156172	34	22290	0.00152535	61	1.02385	-1.85474	0.686577	0.00853666	0.315173
28S-1342	A	24	57130	0.000420095	13	23186	0.000560683	18.5	0.749255	-6.63576	0.256687	-0.0217647	0.386014
28S-1343	A	34	57586	0.000590421	17	23601	0.000720308	25.5	0.819678	-22.1985	0.0844882	-0.0184956	0.397521
28S-1344	A	232	58935	0.00393654	112	24538	0.00456435	172	0.862454	-18.8638	0.0986718	-0.0107281	0.397005
28S-1345	C	169	61397	0.00275258	106	26272	0.00403471	137.5	0.682224	-0.586269	1.2356	-0.0796863	0.185946
28S-1346	C	140	63963	0.00218877	120	27788	0.00431841	130	0.506845	0.310578	2.84296	-0.155249	0.00701187
28S-1347	A	50	64939	0.000769953	17	28525	0.000595968	33.5	1.29194	-0.719409	1.13993	0.00827631	0.208325
28S-1348	A	44	67511	0.000651746	27	32833	0.000822343	35.5	0.792547	-8.82915	0.199407	-0.0208713	0.391089
28S-1349	U	40	68503	0.000583916	29	34282	0.000845925	34.5	0.690269	-2.29529	0.594789	-0.0291209	0.334264
28S-1350	G	125	71505	0.00174813	66	35742	0.00184657	95.5	0.946692	-2.79353	0.51667	0.000433113	0.349095
28S-1351	C	300	71936	0.00417037	221	35669	0.00619586	260.5	0.673091	-0.0695765	1.8325	-0.118837	0.0744246
28S-1352	A	30	73463	0.000408369	25	36539	0.0006842	27.5	0.596856	-1.16731	0.904345	-0.0327129	0.265044
28S-1353	U	42	76222	0.000551022	36	39433	0.000912941	39	0.603568	-0.874064	1.04586	-0.0375525	0.230883
28S-1354	A	74	81096	0.000912499	63	41525	0.00151716	68.5	0.601453	-0.400716	1.39928	-0.051777	0.149877
28S-1355	U	535	82308	0.00649998	309	42091	0.00734124	422	0.885406	-3.65472	0.421078	0.00861599	0.365097
28S-1356	U	63	85557	0.000736351	39	44562	0.000875185	51	0.841366	-61.5176	0.0313512	-0.0171389	0.398746
28S-1357	C	725	89667	0.00808547	509	47908	0.0106245	617	0.761019	-0.468741	1.33448	-0.104247	0.16376
28S-1358	C	545	93638	0.00582029	322	52968	0.00607914	433.5	0.957419	-0.595962	1.2281	0.0454056	0.187673
28S-1359	C	395	98610	0.00400568	296	57163	0.00517817	345.5	0.77357	-1.29502	0.854021	-0.053171	0.277034
28S-1360	G	527	102575	0.0051377	342	60669	0.00563715	434.5	0.911402	-1.68678	0.729497	0.0165435	0.30574
28S-1361	A	98	103645	0.000945535	85	61561	0.00138074	91.5	0.684801	-0.925454	1.01794	-0.0377994	0.23763
28S-1362	U	386	105600	0.0036553	203	62586	0.00324354	294.5	1.12695	0.175491	2.37717	0.0681599	0.0236495
28S-1363	C	645	109040	0.00591526	550	64151	0.00857352	597.5	0.689945	0.218915	2.50933	-0.144533	0.0171234
28S-1364	C	839	110492	0.00759331	609	65120	0.00935197	724	0.811948	-2.30695	0.592692	-0.0490123	0.33468
28S-1365	C	357	113233	0.00315279	322	67301	0.00478448	339.5	0.658963	0.152134	2.31169	-0.101876	0.027574
28S-1366	A	190	119403	0.00159125	126	72851	0.00172956	158	0.920033	-2.9259	0.499249	-0.00497068	0.352198
28S-1367	C	396	125000	0.003168	336	78068	0.00430394	366	0.73607	-0.446416	1.35507	-0.0621387	0.159286
28S-1368	G	250	127285	0.0019641	254	79451	0.00319694	252	0.614368	0.230283	2.54639	-0.0869407	0.0155921
28S-1369	G	119	127403	0.000934044	125	79597	0.00157041	122	0.594777	-0.00597369	1.94836	-0.0539991	0.0597854
28S-1370	A	58	129683	0.000447244	56	80999	0.000691367	57	0.646899	-0.924454	1.01847	-0.0296335	0.237502
28S-1371	A	53	133520	0.000396944	37	82851	0.000446585	45	0.888844	-11.8558	0.152461	-0.0148425	0.394333
28S-1372	A	122	137345	0.000888274	87	85271	0.00102028	104.5	0.870621	-14.362	0.127588	-0.0144393	0.395708
28S-1373	G	174	143382	0.00121354	165	89632	0.00184086	169.5	0.659225	-0.199045	1.63463	-0.0493133	0.104878
28S-1374	G	135	146678	0.000920383	110	92136	0.00119389	122.5	0.770913	-2.69942	0.529813	-0.0252647	0.346702
28S-1375	A	109	148899	0.00073204	90	94453	0.000952855	99.5	0.76826	-2.96104	0.49482	-0.0237358	0.352974
28S-1376	G	129	155095	0.000831748	90	98908	0.000909937	109.5	0.914073	-4.1156	0.383142	-0.0109509	0.370709
28S-1377	U	74	158746	0.000466153	57	101836	0.000559723	65.5	0.832828	-24.4385	0.0770486	-0.017363	0.39776
28S-1378	U	101	168550	0.000599229	108	108425	0.00099608	104.5	0.601587	-0.121579	1.74754	-0.0396536	0.0866499
28S-1379	G	239	175931	0.00135849	239	114013	0.00209625	239	0.648055	0.055267	2.07466	-0.0560623	0.0463726
28S-1380	G	226	178660	0.00126497	182	117440	0.00154973	204	0.816255	-6.02706	0.278922	-0.0212738	0.383722
28S-1381	U	182	183299	0.000992913	152	120789	0.00125839	167	0.789033	-3.16563	0.470518	-0.0235962	0.357138
28S-1382	U	207	190759	0.00108514	222	125387	0.00177052	214.5	0.612893	0.173209	2.37061	-0.0557633	0.0240207
28S-1383	G	239	195419	0.00122301	175	129374	0.00135267	207	0.904149	-3.35547	0.450009	-0.00950405	0.360526
28S-1384	C	526	198330	0.00265215	431	134631	0.00320134	478.5	0.828448	-6.36204	0.266231	-0.0226795	0.385052
28S-1385	U	291	202561	0.0014366	233	137499	0.00169456	262	0.847775	-174.511	0.0111674	-0.0167027	0.398917
28S-1386	C	640	209052	0.00306144	462	142548	0.00324101	551	0.944593	-0.574593	1.24477	0.0125933	0.183845
28S-1387	C	579	214407	0.00270047	524	148404	0.0035309	551.5	0.764811	-0.604303	1.22171	-0.0444145	0.189147
28S-1388	A	749	219937	0.00340552	266	154455	0.00172218	507.5	1.97744	0.7841	9.07828	0.165989	5.0663e-19
28S-1389	G	281	224075	0.00125404	240	159033	0.00150912	260.5	0.830977	-10.381	0.172217	-0.0190628	0.39307
28S-1390	A	104	226997	0.000458156	95	161223	0.000589246	99.5	0.777529	-3.48254	0.437252	-0.0204676	0.362572
28S-1391	C	614	232123	0.00264515	760	165172	0.00460126	687	0.574874	0.613869	5.07599	-0.134941	1.01382e-06
28S-1392	A	296	233860	0.00126571	117	166736	0.000701708	206.5	1.80376	0.623673	5.20823	0.0464018	5.13614e-07
28S-1393	G	480	235978	0.00203409	361	171741	0.002102	420.5	0.967691	-0.466635	1.33639	0.00692264	0.163342
28S-1394	C	1325	238006	0.00556709	1180	173106	0.00681663	1252.5	0.816692	-1.86469	0.684193	-0.0371659	0.315689
28S-1395	A	262	239417	0.00109432	252	174047	0.00144788	257	0.755809	-1.10795	0.929812	-0.0291796	0.258926
28S-1396	G	356	240647	0.00147935	420	178297	0.00235562	388	0.628007	0.337258	2.95741	-0.0653903	0.00503132
28S-1397	G	281	239880	0.00117142	247	177579	0.00139093	264	0.842184	-29.195	0.0649113	-0.0173995	0.398103
28S-1398	A	335	240589	0.00139242	245	177634	0.00137924	290	1.00955	-0.335074	1.46808	0.00428556	0.1358
28S-1399	C	767	241603	0.00317463	674	177693	0.00379306	720.5	0.836958	-9.28243	0.190616	-0.0207876	0.39176
28S-1400	G	645	241480	0.00267103	655	177474	0.00369068	650	0.723722	0.0348174	2.0307	-0.0599173	0.0507513
28S-1401	G	560	239482	0.00233838	430	175525	0.00244979	495	0.954521	-0.50896	1.29891	0.00777106	0.171612
28S-1402	U	228	239628	0.000951475	167	176828	0.000944421	197.5	1.00747	-0.637251	1.19713	-0.00245697	0.194855
28S-1403	G	565	239395	0.00236012	354	175505	0.00201704	459.5	1.17009	0.424173	3.4038	0.0443125	0.00121639
28S-1404	G	949	239102	0.00396902	839	174831	0.00479892	894	0.827065	-4.02895	0.389744	-0.0263788	0.369765
28S-1405	C	1573	240094	0.0065516	1400	175247	0.00798872	1486.5	0.820106	-1.94672	0.665147	-0.0381552	0.319771
28S-1406	C	413	240488	0.00171734	341	175043	0.00194809	377	0.88155	-4.37227	0.364837	-0.0105519	0.373256
28S-1407	A	171	237315	0.000720561	145	172558	0.000840297	158	0.857508	-30.1714	0.0628782	-0.0158403	0.398154
28S-1408	U	224	232442	0.000963681	192	171498	0.00111955	208	0.860778	-18.6851	0.0995678	-0.0152721	0.39697
28S-1409	G	509	231228	0.00220129	503	169887	0.00296079	506	0.74348	-0.315829	1.48956	-0.0458404	0.131556
28S-1410	G	478	229009	0.00208725	395	166442	0.0023732	436.5	0.879511	-4.31977	0.368437	-0.00970507	0.372763
28S-1411	A	672	227669	0.00295165	516	163894	0.00314838	594	0.937516	-0.627459	1.20433	0.00966893	0.193178
28S-1412	G	307	225541	0.00136117	302	160575	0.00188074	304.5	0.723742	-0.411312	1.38878	-0.0386292	0.152089
28S-1413	G	165	222451	0.000741736	179	157009	0.00114006	172	0.650611	-0.127569	1.73825	-0.0377497	0.0880632
28S-1414	U	298	219969	0.00135474	215	154160	0.00139465	256.5	0.971377	-0.827798	1.07233	-0.000481695	0.224499
28S-1415	C	763	218806	0.00348711	676	151915	0.00444986	719.5	0.783645	-0.831405	1.07022	-0.0438052	0.225008
28S-1416	G	896	217497	0.0041196	800	150726	0.00530764	848	0.776163	-0.506444	1.30108	-0.0527949	0.171129
28S-1417	G	467	216909	0.00215298	454	150360	0.00301942	460.5	0.713043	-0.050446	1.86587	-0.0550514	0.0699705
28S-1418	A	149	216747	0.000687437	90	150228	0.000599089	119.5	1.14747	-0.20476	1.62688	0.000278718	0.106213
28S-1419	A	104	213098	0.000488038	91	146199	0.000622439	97.5	0.784074	-4.01133	0.391114	-0.0203077	0.369567
28S-1420	A	363	211937	0.00171277	308	144647	0.00212932	335.5	0.804375	-2.98329	0.492056	-0.0254289	0.353455
28S-1421	C	1490	212876	0.00699938	1015	144931	0.00700333	1252.5	0.999436	0.315701	2.86425	0.0824518	0.00659866
28S-1422	C	740	213890	0.00345972	655	145726	0.00449474	697.5	0.769727	-0.520694	1.28889	-0.0499548	0.173852
28S-1423	G	558	213157	0.00261779	498	146634	0.00339621	528	0.770797	-0.77237	1.10586	-0.0414411	0.216448
28S-1424	C	593	212481	0.00279084	774	147759	0.00523826	683.5	0.53278	0.675204	6.03455	-0.172043	4.93524e-09
28S-1425	U	139	210549	0.000660179	106	146927	0.000721447	122.5	0.915076	-3.7447	0.413092	-0.0120356	0.366315
28S-1426	U	291	209888	0.00138645	469	147584	0.00317785	380	0.436287	0.692336	6.3706	-0.139663	6.13906e-10
28S-1427	A	139	210780	0.000659455	119	148632	0.000800635	129	0.823665	-10.4475	0.171216	-0.0184166	0.393137
28S-1428	G	223	208340	0.00107037	254	149604	0.00169782	238.5	0.630437	0.143531	2.28847	-0.0513546	0.0290867
28S-1429	G	197	206236	0.000955216	189	149041	0.00126811	193	0.753261	-1.36412	0.829061	-0.0279106	0.282915
28S-1430	A	598	202233	0.00295699	572	145696	0.00392598	585	0.753183	-0.356831	1.44454	-0.0518228	0.140536
28S-1431	G	139	197985	0.000702073	129	142318	0.000906421	134	0.774556	-2.70005	0.529722	-0.022848	0.346719
28S-1432	U	137	188683	0.000726086	112	139010	0.000805697	124.5	0.901189	-4.89875	0.332274	-0.0125632	0.377516
28S-1433	G	228	185882	0.00122658	178	134919	0.00131931	203	0.929717	-2.03842	0.645071	-0.00650934	0.324005
28S-1434	U	179	179030	0.000999832	145	129263	0.00112174	162	0.89132	-5.34342	0.308982	-0.0120525	0.380346
28S-1435	G	272	176562	0.00154054	235	125428	0.00187358	253.5	0.822239	-6.72165	0.253832	-0.0212153	0.386295
28S-1436	U	191	172468	0.00110745	156	121710	0.00128174	173.5	0.864025	-15.9669	0.115519	-0.0147011	0.396289
28S-1437	A	203	169401	0.00119834	98	116048	0.000844478	150.5	1.41903	0.362732	3.07563	0.0286929	0.00352212
28S-1438	A	195	158327	0.00123163	99	104897	0.000943783	147	1.30499	0.231647	2.55091	0.0239021	0.0154135
28S-1439	C	357	155147	0.00230104	362	100273	0.00361014	359.5	0.637383	0.274121	2.70017	-0.0882408	0.0104161
28S-1440	A	144	147824	0.000974131	91	90980	0.00100022	117.5	0.973917	-1.66874	0.734428	-0.0047778	0.304638
28S-1441	A	91	143235	0.00063532	66	86743	0.000760868	78.5	0.834993	-25.9639	0.0726898	-0.0175129	0.39789
28S-1442	C	489	139862	0.0034963	332	81636	0.00406683	410.5	0.859712	-14.5687	0.125894	-0.0124062	0.395793
28S-1443	U	142	136455	0.00104064	152	77526	0.00196063	147	0.530765	0.301466	2.80587	-0.0750987	0.00778618
28S-1444	C	445	132776	0.00335151	319	73158	0.00436043	382	0.76862	-1.04873	0.956691	-0.0494091	0.252444
28S-1445	A	286	133665	0.00213968	184	73292	0.00251051	235	0.852289	-65.3414	0.0295441	-0.0157286	0.398768
28S-1446	C	650	133272	0.00487724	438	72699	0.00602484	544	0.809522	-2.59481	0.545231	-0.0388235	0.343841
28S-1447	C	691	133724	0.00516736	517	71939	0.00718664	604	0.719023	0.0241433	2.00849	-0.104201	0.0530799
28S-1448	U	183	130321	0.00140422	134	70235	0.00190788	158.5	0.736013	-1.21698	0.884087	-0.0367498	0.269889
28S-1449	G	313	134350	0.00232974	199	72430	0.00274748	256	0.847954	-211.353	0.0092299	-0.016773	0.398925
28S-1450	C	767	135899	0.0056439	480	73162	0.00656078	623.5	0.860248	-11.113	0.16181	-0.00955596	0.393754
28S-1451	C	311	136052	0.00228589	306	73209	0.00417981	308.5	0.546888	0.483872	3.79751	-0.135079	0.000294724
28S-1452	G	733	135603	0.00540549	358	72522	0.00493643	545.5	1.09502	0.320448	2.88425	0.0975522	0.00622987
28S-1453	A	74	134786	0.000549018	48	72154	0.000665244	61	0.825289	-17.0966	0.108307	-0.0179937	0.396609
28S-1454	A	102	134107	0.000760587	45	70092	0.000642013	73.5	1.18469	-0.423601	1.37679	0.00372593	0.154631
28S-1455	G	226	135518	0.00166768	129	69446	0.00185756	177.5	0.897778	-4.39771	0.363117	-0.00799833	0.373489
28S-1456	C	217	134786	0.00160996	171	67904	0.00251826	194	0.639314	-0.0127388	1.93535	-0.0660908	0.0613156
28S-1457	A	64	134242	0.000476751	42	66503	0.00063155	53	0.75489	-3.69586	0.417389	-0.022094	0.365662
28S-1458	A	68	132967	0.000511405	26	64891	0.000400672	47	1.27637	-0.473267	1.33038	-0.000433613	0.164657
28S-1459	C	581	134293	0.00432636	400	64830	0.00616998	490.5	0.701195	0.0510428	2.06542	-0.102126	0.0472677
28S-1460	U	129	133850	0.000963765	78	64258	0.00121386	103.5	0.79397	-4.91867	0.331155	-0.0227828	0.377656
28S-1461	A	96	135780	0.000707026	37	64060	0.000577584	66.5	1.22411	-0.381877	1.41836	0.00383271	0.145903
28S-1462	G	127	136617	0.000929606	75	65167	0.00115089	101	0.807729	-7.06876	0.242912	-0.0209707	0.387344
28S-1463	C	737	135676	0.00543206	407	64361	0.00632371	572	0.858999	-13.3807	0.136294	-0.0105487	0.395254
28S-1464	C	252	136489	0.0018463	133	64376	0.00206599	192.5	0.893666	-4.69438	0.344199	-0.00784043	0.375997
28S-1465	C	406	134530	0.00301791	223	62733	0.00355475	314.5	0.848981	-6508.09	0.000301117	-0.0165056	0.398942
28S-1466	U	161	133423	0.00120669	83	61597	0.00134747	122	0.895523	-5.89206	0.284385	-0.0106225	0.383132
28S-1467	U	162	136848	0.0011838	79	63132	0.00125135	120.5	0.946017	-2.42951	0.571511	-0.00510934	0.338832
28S-1468	A	66	142177	0.00046421	40	65713	0.000608708	53	0.762616	-4.17842	0.378494	-0.0214506	0.371366
28S-1469	A	61	145961	0.00041792	38	67583	0.000562272	49.5	0.74327	-3.31916	0.453792	-0.0220956	0.35991
28S-1470	A	64	153312	0.000417449	56	72896	0.000768218	60	0.5434	-0.163427	1.68468	-0.0385582	0.0965196
28S-1471	A	229	161330	0.00141945	112	79869	0.0014023	170.5	1.01223	-0.765861	1.10994	0.00498623	0.215472
28S-1472	U	174	170215	0.00102224	145	89465	0.00162075	159.5	0.63072	-0.0626334	1.84447	-0.04973	0.0728042
28S-1473	G	244	179507	0.00135928	215	98425	0.0021844	229.5	0.622265	0.154958	2.31941	-0.0630157	0.0270851
28S-1474	G	286	180725	0.00158251	230	100056	0.00229871	258	0.688435	-0.180598	1.66018	-0.0511652	0.100557
28S-1475	G	358	185160	0.00193346	239	103953	0.00229912	298.5	0.840959	-23.3673	0.0804358	-0.018241	0.397654
28S-1476	A	453	189135	0.00239511	238	107905	0.00220564	345.5	1.0859	0.122786	2.23435	0.0325629	0.0328735
28S-1477	G	329	196353	0.00167555	265	115068	0.00230299	297	0.727557	-0.48964	1.31575	-0.0427689	0.167874
28S-1478	G	239	199568	0.00119759	180	118874	0.00151421	209.5	0.7909	-2.8637	0.507285	-0.0247701	0.350776
28S-1479	C	905	201629	0.00448844	722	121341	0.00595017	813.5	0.754338	-0.173963	1.66956	-0.0693818	0.0989984
28S-1480	G	600	204260	0.00293743	474	124155	0.00381781	537	0.769403	-0.734696	1.12988	-0.045035	0.210714
28S-1481	C	498	203700	0.00244477	441	124426	0.00354428	469.5	0.68978	0.121582	2.23128	-0.0694925	0.033099
28S-1482	U	665	205641	0.00323379	779	127649	0.00610267	722	0.529898	0.686911	6.26021	-0.199359	1.23273e-09
28S-1483	U	128	217441	0.000588665	147	140861	0.00104358	137.5	0.564082	0.175195	2.37632	-0.0444325	0.0236975
28S-1484	U	318	232822	0.00136585	356	160964	0.00221167	337	0.617564	0.325521	2.90594	-0.0645726	0.00585069
28S-1485	A	396	249584	0.00158664	323	189361	0.00170574	359.5	0.930179	-1.26772	0.864304	-0.0035045	0.274597
28S-1486	G	371	256545	0.00144614	327	207242	0.00157787	349	0.916517	-1.74223	0.714747	-0.00650422	0.309013
28S-1487	C	1090	259969	0.00419281	924	210564	0.00438821	1007	0.95547	-0.0464164	1.87306	0.0273789	0.0690369
28S-1488	A	194	264398	0.000733742	237	213870	0.00110815	215.5	0.662133	-0.0773016	1.81936	-0.0359563	0.0762319
28S-1489	U	180	272005	0.000661753	176	223565	0.000787243	178	0.840595	-28.7047	0.0659829	-0.0171333	0.398075
28S-1490	U	216	279749	0.000772121	305	229374	0.00132971	260.5	0.58067	0.356213	3.04448	-0.0500153	0.00387434
28S-1491	G	229	287327	0.000797001	229	237864	0.000962735	229	0.827851	-9.29279	0.190425	-0.0184231	0.391774
28S-1492	U	223	288489	0.000772993	252	244034	0.00103264	237.5	0.748558	-1.02272	0.968993	-0.0262509	0.249471
28S-1493	G	631	295128	0.00213806	576	249007	0.00231319	603.5	0.924289	-0.877536	1.04392	-0.000150295	0.23135
28S-1494	C	2970	296181	0.0100277	2875	249756	0.0115112	2922.5	0.871119	-1.81326	0.6967	0.0074469	0.312974
28S-1495	U	501	297808	0.00168229	443	250923	0.00176548	472	0.95288	-0.563544	1.25356	0.00071482	0.181836
28S-1496	G	781	306680	0.00254663	610	254332	0.00239844	695.5	1.06179	0.333571	2.94105	0.0314209	0.00528004
28S-1497	A	118	309528	0.000381226	111	257140	0.000431671	114.5	0.883138	-8.2808	0.211189	-0.0151297	0.390144
28S-1498	U	170	319245	0.000532506	175	260307	0.000672283	172.5	0.792087	-3.30587	0.455193	-0.0201055	0.359681
28S-1499	A	378	327424	0.00115447	339	262659	0.00129065	358.5	0.894487	-2.96501	0.494324	-0.0109966	0.35306
28S-1500	C	1897	328702	0.00577118	1868	262455	0.00711741	1882.5	0.810855	-0.968361	0.995752	-0.0419784	0.242999
28S-1501	C	1313	330461	0.00397324	1372	262955	0.00521762	1342.5	0.761503	0.0152707	1.99039	-0.0593623	0.0550356
28S-1502	G	1069	333328	0.00320705	1051	263394	0.00399022	1060	0.803728	-1.20034	0.890771	-0.0334611	0.268293
28S-1503	G	797	331111	0.00240705	813	260398	0.00312214	805	0.77096	-0.434546	1.36629	-0.0393818	0.156875
28S-1504	A	494	336663	0.00146734	486	262298	0.00185285	490	0.791936	-1.54871	0.769018	-0.0264359	0.296819
28S-1505	C	700	345577	0.0020256	1033	264691	0.00390266	866.5	0.51903	0.726537	7.16733	-0.137427	2.79213e-12
28S-1506	C	931	363119	0.0025639	1589	275007	0.00577803	1260	0.443732	0.826647	11.3064	-0.236386	6.94961e-29
28S-1507	G	927	367831	0.00252018	829	276137	0.00300213	878	0.839463	-10.7859	0.1663	-0.0191905	0.393464
28S-1508	C	1976	374277	0.00527951	1994	280838	0.00710018	1985	0.743575	0.335255	2.9485	-0.0867759	0.00516547
28S-1509	C	1088	381904	0.00284888	1041	284658	0.00365702	1064.5	0.779018	-0.399357	1.40064	-0.040532	0.149593
28S-1510	G	787	384552	0.00204654	736	287208	0.0025626	761.5	0.798617	-1.32703	0.842276	-0.0286283	0.279808
28S-1511	G	848	386476	0.00219419	783	289032	0.00270904	815.5	0.809949	-1.92234	0.670694	-0.0264377	0.318589
28S-1512	U	436	389105	0.00112052	397	292962	0.00135512	416.5	0.826876	-6.299	0.26853	-0.0193247	0.384815
28S-1513	C	1002	398825	0.00251238	996	302673	0.00329068	999	0.763484	-0.170008	1.6752	-0.0429265	0.0980684
28S-1514	G	2105	401026	0.00524904	1742	306631	0.0056811	1923.5	0.923948	-0.0578905	1.85274	0.0234945	0.0716997
28S-1515	C	1064	403382	0.0026377	1009	309093	0.00326439	1036.5	0.808022	-1.46608	0.794784	-0.0290624	0.290899
28S-1516	A	821	406432	0.00202002	424	313291	0.00135337	622.5	1.49258	0.715818	6.89699	0.0652836	1.86876e-11
28S-1517	G	578	406262	0.00142273	556	317024	0.00175381	567	0.811221	-2.62309	0.540975	-0.0227296	0.344636
28S-1518	A	339	409596	0.000827645	280	318382	0.000879447	309.5	0.941097	-1.16637	0.904739	-0.00890557	0.26495
28S-1519	G	614	411057	0.00149371	541	319079	0.0016955	577.5	0.880982	-3.40895	0.44455	-0.0114155	0.361407
28S-1520	C	1068	412794	0.00258725	1261	320368	0.0039361	1164.5	0.657313	0.549778	4.35341	-0.0873501	3.05847e-05
28S-1521	U	236	406778	0.000580169	242	316361	0.000764949	239	0.758442	-1.2509	0.870764	-0.0230172	0.273063
28S-1522	C	1631	409872	0.00397929	1817	317343	0.00572567	1724	0.694992	0.527376	4.14706	-0.0992961	7.35185e-05
28S-1523	G	609	410651	0.00148301	501	319501	0.00156807	555	0.945756	-0.543885	1.26952	-0.00226089	0.178211
28S-1524	U	590	412412	0.00143061	486	321514	0.0015116	538	0.946421	-0.557888	1.25811	-0.0026798	0.1808
28S-1525	C	1709	413102	0.00413699	1447	316723	0.00456866	1578	0.905515	-0.532328	1.2791	0.00775199	0.17605
28S-1526	G	1544	407587	0.00378815	1240	309265	0.00400951	1392	0.944792	0.0152394	1.99033	0.0195702	0.0550426
28S-1527	A	174	403842	0.000430862	168	303689	0.000553198	171	0.778857	-2.48249	0.562816	-0.0201568	0.340507
28S-1528	U	496	398625	0.00124428	514	300789	0.00170884	505	0.728142	-0.137946	1.7224	-0.035902	0.090512
28S-1529	C	752	394609	0.00190568	785	295105	0.00266007	768.5	0.716404	0.165638	2.3491	-0.0496257	0.0252716
28S-1530	C	788	381441	0.00206585	822	279281	0.00294327	805	0.701889	0.272118	2.69274	-0.0571625	0.0106268
28S-1531	U	458	373341	0.00122676	415	269843	0.00153793	436.5	0.797669	-2.01731	0.649585	-0.0239218	0.323059
28S-1532	U	789	372861	0.00211607	782	273547	0.00285874	785.5	0.740211	-0.0221805	1.91747	-0.0457075	0.063464
28S-1533	G	514	373345	0.00137674	536	273843	0.00195733	525	0.703379	0.0885616	2.15045	-0.0432725	0.0395121
28S-1534	G	583	371524	0.00156921	500	272215	0.00183678	541.5	0.854326	-25.7478	0.0732771	-0.0155884	0.397873
28S-1535	U	543	367736	0.0014766	493	268862	0.00183365	518	0.805279	-2.26688	0.599961	-0.0240356	0.333232
28S-1536	G	934	359989	0.00259452	654	256677	0.00254795	794	1.01828	0.230068	2.54568	0.0239994	0.0156204
28S-1537	A	182	356382	0.000510688	152	250416	0.00060699	167	0.841345	-32.8133	0.0579653	-0.0169491	0.398273
28S-1538	U	256	344847	0.000742358	252	237126	0.00106273	254	0.698541	-0.265807	1.54842	-0.031526	0.120303
28S-1539	C	1015	339663	0.00298826	842	230157	0.00365837	928.5	0.816827	-2.34929	0.585198	-0.0275518	0.33616
28S-1540	G	438	336618	0.00130118	375	227056	0.00165157	406.5	0.787841	-1.61344	0.749969	-0.0259934	0.301144
28S-1541	U	222	337841	0.000657114	200	228744	0.00087434	211	0.751554	-1.22309	0.881654	-0.0245124	0.27047
28S-1542	C	838	337832	0.00248052	814	228691	0.00355939	826	0.696896	0.306135	2.82476	-0.0673401	0.00738308
28S-1543	G	1271	335466	0.00378876	1035	227457	0.00455031	1153	0.832638	-4.97635	0.327959	-0.0234865	0.378054
28S-1544	C	614	332711	0.00184545	748	227132	0.00329324	681	0.560374	0.635575	5.37833	-0.10576	2.08744e-07
28S-1545	U	510	326038	0.00156423	463	226502	0.00204413	486.5	0.765232	-0.716978	1.14154	-0.0325861	0.207942
28S-1546	G	574	313028	0.0018337	512	215379	0.0023772	543	0.771369	-0.761239	1.11285	-0.0338347	0.214776
28S-1547	A	258	311845	0.000827334	185	214438	0.00086272	221.5	0.958983	-1.17533	0.901014	-0.00760128	0.265842
28S-1548	C	1929	308974	0.00624324	1965	212362	0.00925307	1947	0.674721	0.611737	5.04812	-0.167908	1.16744e-06
28S-1549	G	541	315239	0.00171616	452	216106	0.00209157	496.5	0.820513	-4.18348	0.378124	-0.0221011	0.371418
28S-1550	C	958	310119	0.00308914	817	210642	0.00387862	887.5	0.796453	-1.06956	0.94706	-0.035637	0.254769
28S-1551	G	886	306381	0.00289182	706	206832	0.0034134	796	0.847198	-66.5306	0.0290239	-0.0170775	0.398774
28S-1552	C	1296	303723	0.00426705	1007	204447	0.00492548	1151.5	0.866321	-4.73442	0.341795	-0.00848169	0.376307
28S-1553	C	990	299410	0.0033065	783	201136	0.00389289	886.5	0.84937	-267.435	0.00730158	-0.0163625	0.398932
28S-1554	G	1242	295002	0.00421014	981	196999	0.00497972	1111.5	0.845457	-27.6609	0.0683859	-0.0181495	0.398011
28S-1555	G	1095	292585	0.0037425	777	195399	0.00397648	936	0.94116	-0.251941	1.56557	0.0179167	0.117133
28S-1556	U	360	291610	0.00123453	241	195973	0.00122976	300.5	1.00387	-0.361229	1.43988	0.00137539	0.141485
28S-1557	G	473	294807	0.00160444	378	197470	0.00191421	425.5	0.838171	-13.9458	0.13114	-0.0184533	0.395527
28S-1558	A	221	296375	0.000745677	206	197852	0.00104118	213.5	0.716183	-0.584388	1.23707	-0.0294968	0.185609
28S-1559	G	259	294961	0.000878082	232	198020	0.0011716	245.5	0.749473	-1.01573	0.972354	-0.0274602	0.248659
28S-1560	U	201	288613	0.000696434	176	198057	0.000888633	188.5	0.783714	-2.5834	0.546966	-0.0219595	0.343515
28S-1561	A	291	289637	0.00100471	227	197265	0.00115074	259	0.873098	-7.72811	0.224562	-0.0139062	0.389009
28S-1562	G	381	287763	0.00132401	459	196118	0.00234043	420	0.565711	0.525239	4.12839	-0.0787665	7.94219e-05
28S-1563	G	492	285162	0.00172534	570	195181	0.00292037	531	0.590794	0.527809	4.15086	-0.087313	7.23675e-05
28S-1564	G	655	278848	0.00234895	530	193188	0.00274344	592.5	0.856206	-18.0027	0.103143	-0.0146466	0.396826
28S-1565	A	305	274239	0.00111217	291	189466	0.0015359	298	0.724117	-0.432375	1.36836	-0.0345204	0.156431
28S-1566	G	267	268188	0.00099557	329	182976	0.00179805	298	0.553694	0.464358	3.65916	-0.0663693	0.000493654
28S-1567	G	229	265202	0.000863493	216	180005	0.00119997	222.5	0.719597	-0.595771	1.22825	-0.0310917	0.187639
28S-1568	U	312	258184	0.00120844	260	175155	0.0014844	286	0.814094	-4.55196	0.353029	-0.0213745	0.374841
28S-1569	C	691	256235	0.00269674	726	169284	0.00428865	708.5	0.628809	0.506501	3.97164	-0.105174	0.000149848
28S-1570	G	1482	245969	0.00602515	1177	163129	0.00721515	1329.5	0.835069	-5.55645	0.298942	-0.0259213	0.381509
28S-1571	C	717	219035	0.00327345	616	154005	0.00399987	666.5	0.818389	-3.15366	0.471873	-0.0279952	0.35691
28S-1572	A	324	210288	0.00154074	296	150101	0.00197201	310	0.781308	-1.68749	0.729304	-0.029042	0.305783
28S-1573	C	674	202549	0.00332759	582	144334	0.00403231	628	0.825231	-4.53421	0.354161	-0.0254976	0.374691
28S-1574	U	236	203603	0.00115912	175	143917	0.00121598	205.5	0.953239	-1.3723	0.826203	-0.00460705	0.283585
28S-1575	G	273	199592	0.00136779	263	138713	0.001896	268	0.721408	-0.475418	1.32844	-0.0392242	0.165082
28S-1576	G	289	197388	0.00146412	255	136542	0.00186756	272	0.783977	-1.99483	0.654461	-0.0279105	0.322034
28S-1577	U	155	195514	0.000792782	134	135272	0.000990597	144.5	0.800308	-4.54513	0.353463	-0.0210405	0.374784
28S-1578	U	133	189047	0.000703529	123	132399	0.00092901	128	0.757289	-2.04089	0.644547	-0.0245122	0.324114
28S-1579	G	181	185486	0.000975815	158	126464	0.00124937	169.5	0.781047	-2.62516	0.540666	-0.0244823	0.344694
28S-1580	C	1206	186097	0.00648049	872	125745	0.00693467	1039	0.934506	-0.275104	1.53713	0.0391987	0.122417
28S-1581	G	682	182970	0.00372739	593	124855	0.00474951	637.5	0.784794	-0.983104	0.98835	-0.0451303	0.24479
28S-1582	U	222	181357	0.0012241	167	126129	0.00132404	194.5	0.924522	-2.31317	0.591578	-0.00711938	0.334901
28S-1583	U	159	187584	0.00084762	171	133816	0.00127787	165	0.663305	-0.240788	1.57964	-0.0387932	0.11457
28S-1584	G	340	195703	0.00173733	316	140015	0.0022569	328	0.769784	-1.21593	0.884505	-0.0332941	0.269789
28S-1585	A	148	197898	0.00074786	143	142350	0.00100457	145.5	0.744461	-1.47952	0.790476	-0.0263727	0.291894
28S-1586	A	436	206290	0.00211353	394	148337	0.00265611	415	0.795722	-1.97808	0.658142	-0.0297922	0.321257
28S-1587	G	469	219675	0.00213497	443	161637	0.00274071	456	0.778985	-1.13758	0.916926	-0.0345227	0.262025
28S-1588	G	187	219514	0.000851882	182	163131	0.00111567	184.5	0.763562	-1.72612	0.718971	-0.0254616	0.308079
28S-1589	G	327	219732	0.00148818	395	164400	0.00240268	361	0.619383	0.342872	2.98268	-0.0683124	0.00466757
28S-1590	U	265	219134	0.00120931	306	165698	0.00184673	285.5	0.654835	0.103812	2.18704	-0.0501792	0.0364975
28S-1591	U	432	230538	0.00187388	707	175301	0.00403306	569.5	0.464629	0.723165	7.08004	-0.16207	5.19986e-12
28S-1592	U	626	234152	0.00267348	822	180505	0.00455389	724	0.587075	0.602764	4.93409	-0.128504	2.06256e-06
28S-1593	G	1014	242482	0.00418175	1247	194481	0.00641194	1130.5	0.652183	0.556522	4.41961	-0.134995	2.28764e-05
28S-1594	G	492	243230	0.00202278	420	197038	0.00213157	456	0.948962	-0.65029	1.18767	0.00350338	0.197066
28S-1595	G	1126	245416	0.00458813	962	198446	0.00484767	1044	0.946461	-0.117124	1.75451	0.0278736	0.0855989
28S-1596	C	1442	247901	0.00581684	1233	199832	0.00617018	1337.5	0.942734	-0.0241371	1.91381	0.0378238	0.0639109
28S-1597	G	1188	249457	0.00476234	1009	200282	0.0050379	1098.5	0.945304	-0.101563	1.77929	0.0290681	0.0819312
28S-1598	U	400	248185	0.0016117	365	199514	0.00182945	382.5	0.880978	-4.41524	0.361941	-0.0110135	0.373649
28S-1599	G	688	253608	0.00271285	589	202421	0.00290978	638.5	0.932322	-0.658011	1.18214	0.00626518	0.198361
28S-1600	A	532	251481	0.00211547	476	199093	0.00239084	504	0.884821	-3.22239	0.464192	-0.00846218	0.358196
28S-1601	G	378	256546	0.00147342	380	202725	0.00187446	379	0.78605	-1.61682	0.749	-0.0275876	0.301363
28S-1602	C	1393	259904	0.00535967	1287	204957	0.00627937	1340	0.853537	-18.8895	0.0985446	-0.0138115	0.39701
28S-1603	C	317	261439	0.00121252	322	206157	0.00156192	319.5	0.776303	-1.45272	0.799113	-0.0271712	0.289897
28S-1604	U	277	262100	0.00105685	222	208148	0.00106655	249.5	0.990905	-0.608769	1.21832	-0.00229801	0.189931
28S-1605	G	368	267196	0.00137727	337	213527	0.00157825	352.5	0.872651	-6.58658	0.258351	-0.013003	0.385848
28S-1606	C	2102	269265	0.00780644	1913	215635	0.00887147	2007.5	0.879948	-1.44096	0.802964	0.00930757	0.289004
28S-1607	C	752	270967	0.00277525	797	217600	0.00366268	774.5	0.757708	-0.239504	1.58128	-0.0478986	0.114274
28S-1608	U	586	272450	0.00215085	536	219816	0.0024384	561	0.882075	-3.32598	0.453076	-0.00893089	0.360027
28S-1609	G	545	277690	0.00196262	651	225872	0.00288216	598	0.680954	0.271501	2.69046	-0.0619847	0.0106923
28S-1610	G	509	279261	0.00182267	521	228687	0.00227822	515	0.800039	-1.91139	0.673219	-0.0269798	0.318049
28S-1611	A	321	281249	0.00114134	318	230036	0.00138239	319.5	0.825625	-6.87212	0.24898	-0.0195437	0.386767
28S-1612	G	249	284316	0.000875786	288	231936	0.00124172	268.5	0.7053	-0.292391	1.51657	-0.0332661	0.126321
28S-1613	C	1449	286052	0.00506551	1418	232529	0.00609816	1433.5	0.830662	-3.75454	0.412237	-0.0269891	0.366444
28S-1614	G	511	286194	0.0017855	482	232021	0.0020774	496.5	0.85949	-13.2636	0.137412	-0.0144597	0.395194
28S-1615	G	1490	285840	0.00521271	1323	230985	0.00572764	1406.5	0.910096	-0.503946	1.30324	0.0163719	0.170648
28S-1616	C	1318	286849	0.00459475	1125	231495	0.00485972	1221.5	0.945477	-0.0427637	1.87962	0.027535	0.0681922
28S-1617	C	534	289727	0.00184311	493	233543	0.00211096	513.5	0.873117	-5.16574	0.317886	-0.0117252	0.379286
28S-1618	A	234	290753	0.000804807	219	234357	0.000934472	226.5	0.861243	-17.126	0.108132	-0.0154369	0.396617
28S-1619	G	339	292325	0.00115967	386	236763	0.00163032	362.5	0.711312	-0.165464	1.68173	-0.0375878	0.0969993
28S-1620	U	245	291547	0.000840345	282	237456	0.00118759	263.5	0.707606	-0.327902	1.47601	-0.0322787	0.134224
28S-1621	G	336	294237	0.00114194	398	239786	0.00165981	367	0.687991	0.0247873	2.00982	-0.041604	0.0529386
28S-1622	G	947	295136	0.00320869	919	240676	0.00381841	933	0.840321	-11.5609	0.156039	-0.0196103	0.394115
28S-1623	C	1818	297017	0.00612086	1675	242281	0.00691346	1746.5	0.885354	-1.23485	0.877018	0.00711798	0.271575
28S-1624	G	1578	298521	0.00528606	1419	243769	0.00582108	1498.5	0.908089	-0.504597	1.30267	0.0158111	0.170773
28S-1625	C	625	299529	0.00208661	693	244720	0.00283181	659	0.736847	-0.0791452	1.81625	-0.0463269	0.0766639
28S-1626	A	310	301094	0.00102958	247	245569	0.00100583	278.5	1.02361	-0.258562	1.55733	-1.79646e-05	0.118649
28S-1627	G	232	302194	0.000767719	225	247327	0.000909727	228.5	0.8439	-42.4606	0.0450983	-0.016947	0.398537
28S-1628	A	168	302342	0.000555662	159	247759	0.000641753	163.5	0.865851	-14.5562	0.125995	-0.0154971	0.395788
28S-1629	U	1362	301670	0.00451487	1508	247973	0.00608131	1435	0.742417	0.227687	2.53783	-0.0773545	0.0159351
28S-1630	C	1324	301020	0.00439838	1652	246839	0.00669262	1488	0.657198	0.601889	4.92325	-0.137029	2.17579e-06
28S-1631	U	166	300794	0.000551873	163	248971	0.000654695	164.5	0.842947	-42.0596	0.0455183	-0.0168847	0.398529
28S-1632	U	234	298268	0.000784529	303	258798	0.0011708	268.5	0.670081	-0.0144125	1.93215	-0.0361815	0.0616954
28S-1633	G	473	298905	0.00158244	702	262640	0.00267286	587.5	0.592041	0.547871	4.33504	-0.0809998	3.31247e-05
28S-1634	G	351	298715	0.00117503	371	264619	0.00140202	361	0.838103	-15.0449	0.122157	-0.0179438	0.395977
28S-1635	U	276	292450	0.000943751	287	261846	0.00109606	281.5	0.861036	-15.5332	0.118549	-0.0152716	0.396149
28S-1636	G	371	287913	0.00128858	472	254818	0.0018523	421.5	0.695666	0.038533	2.03855	-0.0431785	0.0499474
28S-1637	G	265	283431	0.000934972	373	248832	0.001499	319	0.623729	0.284024	2.73752	-0.0482192	0.00941031
28S-1638	U	171	279633	0.000611516	219	245130	0.000893404	195	0.684479	-0.307404	1.49915	-0.0303142	0.129682
28S-1639	A	126	272012	0.000463215	124	233521	0.000531001	125	0.872342	-11.9004	0.151933	-0.0153491	0.394364
28S-1640	G	139	261138	0.000532286	113	222162	0.000508638	126	1.04649	-0.673096	1.17148	-0.00708007	0.200865
28S-1641	U	265	256657	0.00103251	275	218342	0.00125949	270	0.81978	-5.82322	0.287254	-0.0199657	0.382818
28S-1642	A	977	246250	0.00396751	825	204580	0.00403265	901	0.983847	0.113209	2.21022	0.0345684	0.0346844
28S-1643	G	1139	247193	0.00460774	983	205960	0.00477277	1061	0.965421	0.0629423	2.09165	0.0356857	0.0447598
28S-1644	C	696	245430	0.00283584	827	205725	0.00401993	761.5	0.705445	0.231595	2.55074	-0.0706889	0.0154203
28S-1645	A	187	234500	0.000797441	171	190164	0.000899224	179	0.886811	-5.71832	0.29174	-0.0133185	0.382321
28S-1646	A	117	224865	0.000520312	111	175166	0.000633685	114	0.82109	-10.0087	0.17804	-0.0181734	0.392669
28S-1647	A	197	221372	0.000889905	220	169456	0.00129827	208.5	0.685453	-0.27159	1.54138	-0.0364486	0.121619
28S-1648	U	136	217349	0.000625722	129	163454	0.000789213	132.5	0.792843	-3.98594	0.393105	-0.0206738	0.369278
28S-1649	A	123	218652	0.000562538	132	162846	0.000810582	127.5	0.693993	-0.726105	1.1355	-0.0283108	0.209376
28S-1650	C	464	217564	0.00213271	486	161130	0.0030162	475	0.707084	0.0144582	1.98875	-0.0566981	0.0552156
28S-1651	U	169	213522	0.000791488	184	156615	0.00117486	176.5	0.673689	-0.27945	1.53191	-0.0358516	0.123402
28S-1652	C	698	213685	0.00326649	650	155145	0.00418963	674	0.779661	-0.776668	1.10319	-0.0437767	0.217088
28S-1653	G	720	212330	0.00339095	659	154567	0.00426352	689.5	0.795339	-1.29265	0.854906	-0.0379803	0.276825
28S-1654	A	139	209043	0.000664935	111	150641	0.000736851	125	0.902401	-4.76163	0.340182	-0.0128171	0.376514
28S-1655	G	268	210098	0.0012756	217	150393	0.00144289	242.5	0.884058	-5.23247	0.314482	-0.0117587	0.379695
28S-1656	A	139	206974	0.000671582	111	146300	0.000758715	125	0.885157	-7.42651	0.232599	-0.0139359	0.388295
28S-1657	G	182	205648	0.000885007	163	143699	0.00113432	172.5	0.780213	-2.54507	0.552881	-0.0238375	0.3424
28S-1658	A	134	201748	0.000664195	103	140731	0.000731893	118.5	0.907503	-4.42444	0.361327	-0.0124913	0.373732
28S-1659	G	239	200375	0.00119276	155	139616	0.00111019	197	1.07438	-0.197112	1.63727	0.00698631	0.104427
28S-1660	A	119	198819	0.000598534	98	139698	0.000701513	108.5	0.853205	-74.5626	0.0259388	-0.0162353	0.398808
28S-1661	U	473	195534	0.00241902	332	139410	0.00238146	402.5	1.01577	-0.0961881	1.78801	0.0207907	0.0806662
28S-1662	C	699	199426	0.00350506	661	142940	0.00462432	680	0.757962	-0.328851	1.47496	-0.0560278	0.134433
28S-1663	C	481	198709	0.00242063	489	142634	0.00342836	485	0.70606	0.0318117	2.0244	-0.0625186	0.0514042
28S-1664	U	388	202030	0.00192051	328	149316	0.00219668	358	0.874276	-6.0632	0.277495	-0.0112916	0.383874
28S-1665	U	527	208221	0.00253096	564	166582	0.00338572	545.5	0.747541	-0.320269	1.48455	-0.0487581	0.132539
28S-1666	G	632	215396	0.00293413	583	179251	0.00325242	607.5	0.902137	-1.61816	0.748617	-0.000271366	0.30145
28S-1667	A	423	216586	0.00195303	403	183506	0.00219611	413	0.889314	-3.15327	0.471918	-0.00819151	0.356903
28S-1668	G	489	217234	0.00225103	509	185491	0.00274407	499	0.820325	-4.11638	0.383083	-0.023892	0.370718
28S-1669	G	325	217534	0.00149402	294	186288	0.0015782	309.5	0.946659	-1.04656	0.957705	-0.00203483	0.252199
28S-1670	C	779	216948	0.00359072	858	186049	0.00461169	818.5	0.778613	-0.58497	1.23662	-0.0469767	0.185714
28S-1671	C	604	214309	0.00281836	771	183653	0.00419813	687.5	0.671336	0.361172	3.06812	-0.0865371	0.00360434
28S-1672	U	583	208955	0.00279007	511	182945	0.00279319	547	0.998885	-0.0317442	1.8997	0.0228119	0.0656538
28S-1673	G	333	210697	0.00158047	300	185993	0.00161296	316.5	0.979854	-0.537875	1.27449	0.00331199	0.17709
28S-1674	A	400	212081	0.00188607	333	188858	0.00176323	366.5	1.06967	0.111937	2.20705	0.0200307	0.0349278
28S-1675	C	1331	211604	0.00629005	1538	189288	0.00812518	1434.5	0.774143	-0.123111	1.74515	-0.0735953	0.0870114
28S-1676	G	293	208794	0.0014033	328	187144	0.00175266	310.5	0.800667	-2.80152	0.515584	-0.0244625	0.34929
28S-1677	U	161	204297	0.000788068	197	185231	0.00106354	179	0.740988	-1.15825	0.908144	-0.0272981	0.264133
28S-1678	G	440	205523	0.00214088	535	184779	0.00289535	487.5	0.73942	-0.287569	1.52225	-0.0462963	0.125236
28S-1679	G	725	204804	0.00353997	764	183803	0.00415662	744.5	0.851645	-44.3576	0.0432122	-0.0154639	0.39857
28S-1680	G	564	205919	0.00273894	734	183281	0.00400478	649	0.683918	0.285831	2.74445	-0.0785805	0.0092333
28S-1681	G	397	207401	0.00191417	449	183211	0.00245073	423	0.781061	-1.28837	0.856503	-0.0321398	0.276447
28S-1682	A	131	208089	0.000629538	140	182001	0.000769227	135.5	0.818404	-8.19162	0.213238	-0.0187221	0.389975
28S-1683	A	210	207114	0.00101393	194	175893	0.00110294	202	0.919299	-2.46569	0.565544	-0.00922937	0.339983
28S-1684	G	435	209861	0.0020728	551	174222	0.00316263	493	0.655404	0.315528	2.86352	-0.0739976	0.00661232
28S-1685	G	226	210074	0.00107581	261	172708	0.00151122	243.5	0.711882	-0.428539	1.37203	-0.0359675	0.155646
28S-1686	G	365	211369	0.00172684	427	172662	0.00247304	396	0.698265	-0.00977939	1.94102	-0.0515101	0.0606452
28S-1687	U	179	212543	0.000842183	148	172433	0.000858304	163.5	0.981217	-1.1209	0.924137	-0.00585487	0.260292
28S-1688	U	330	217698	0.00151586	367	174820	0.0020993	348.5	0.722079	-0.298668	1.50924	-0.041527	0.12773
28S-1689	C	1051	224176	0.00468828	1112	177169	0.00627649	1081.5	0.746959	0.0679919	2.10299	-0.0766305	0.0437085
28S-1690	C	557	230645	0.00241497	567	191914	0.00295445	562	0.8174	-3.36631	0.448891	-0.0252691	0.360707
28S-1691	A	205	234173	0.000875421	187	194302	0.000962419	196	0.909605	-3.0591	0.482866	-0.0110338	0.355042
28S-1692	U	162	235651	0.000687457	166	197429	0.000840809	164	0.817615	-7.13907	0.240814	-0.0189898	0.387541
28S-1693	G	239	238118	0.0010037	254	197926	0.00128331	246.5	0.782123	-2.04605	0.643456	-0.0245691	0.324342
28S-1694	U	959	236691	0.0040517	784	196260	0.0039947	871.5	1.01427	0.252213	2.62107	0.0454994	0.0128561
28S-1695	G	640	241796	0.00264686	526	200413	0.00262458	583	1.00849	0.0554874	2.07514	0.0228049	0.0463261
28S-1696	A	258	241817	0.00106692	237	198548	0.00119367	247.5	0.89382	-3.83975	0.40498	-0.011486	0.367533
28S-1697	A	138	247393	0.000557817	85	202794	0.000419145	111.5	1.33085	0.1647	2.34646	0.00245208	0.0254287
28S-1698	C	421	256113	0.00164381	455	210072	0.00216592	438	0.75894	-0.672052	1.17221	-0.0348234	0.200693
28S-1699	A	150	259027	0.00057909	151	212254	0.000711412	150.5	0.814001	-6.60164	0.257839	-0.0188504	0.385899
28S-1700	G	268	261390	0.00102529	314	216751	0.00144867	291	0.707746	-0.265087	1.5493	-0.035725	0.120139
28S-1701	U	178	260018	0.000684568	196	218416	0.00089737	187	0.76286	-1.68231	0.730712	-0.0237703	0.305468
28S-1702	G	365	262866	0.00138854	690	220369	0.00313111	527.5	0.443466	0.731579	7.30196	-0.135741	1.05416e-12
28S-1703	G	349	261885	0.00133265	308	219165	0.00140533	328.5	0.948277	-0.956209	1.00194	-0.00340747	0.241502
28S-1704	U	211	264054	0.000799079	232	221836	0.00104582	221.5	0.764071	-1.50165	0.783483	-0.0248515	0.293505
28S-1705	U	269	267686	0.00100491	309	225709	0.00136902	289	0.734035	-0.587056	1.23499	-0.0312891	0.186087
28S-1706	G	495	269336	0.00183785	612	225874	0.00270948	553.5	0.678306	0.255669	2.63324	-0.0599341	0.0124515
28S-1707	G	529	269409	0.00196356	551	226069	0.00243731	540	0.805625	-2.22067	0.608569	-0.026432	0.331504
28S-1708	A	507	271908	0.0018646	411	226619	0.00181362	459	1.02811	0.0423677	2.04671	0.0139975	0.0491215
28S-1709	C	509	279776	0.00181931	888	231529	0.00383537	698.5	0.474351	0.74093	7.56552	-0.151434	1.48606e-13
28S-1710	A	232	281352	0.00082459	209	232933	0.000897254	220.5	0.919015	-2.33063	0.588477	-0.0106121	0.335514
28S-1711	U	176	277186	0.000634953	181	233437	0.00077537	178.5	0.818903	-7.14238	0.240716	-0.0187034	0.38755
28S-1712	G	437	274629	0.00159124	468	233765	0.00200201	452.5	0.79482	-1.79758	0.700604	-0.0266924	0.312122
28S-1713	G	682	270389	0.00252229	627	228998	0.00273802	654.5	0.921212	-0.876416	1.04454	0.00206392	0.231199
28S-1714	G	937	270740	0.00346088	794	229401	0.00346119	865.5	0.999912	0.184717	2.40407	0.0325511	0.0221765
28S-1715	U	311	268839	0.00115683	266	227303	0.00117024	288.5	0.988534	-0.518026	1.29115	-0.00117626	0.173345
28S-1716	C	538	264245	0.00203599	626	218081	0.00287049	582	0.709282	0.0947183	2.16507	-0.0541645	0.0382846
28S-1717	A	199	256430	0.00077604	300	208390	0.00143961	249.5	0.539063	0.448298	3.55264	-0.0584089	0.000724826
28S-1718	G	300	252787	0.00118677	285	205702	0.0013855	292.5	0.856565	-24.6779	0.0763303	-0.015525	0.397782
28S-1719	U	245	250227	0.000979111	240	203863	0.00117726	242.5	0.831685	-11.2524	0.159968	-0.0184243	0.39387
28S-1720	C	1549	245452	0.00631081	1858	197297	0.00941727	1703.5	0.670131	0.597501	4.86957	-0.174654	2.82978e-06
28S-1721	G	390	238540	0.00163495	422	191301	0.00220595	406	0.741154	-0.433775	1.36702	-0.0388462	0.156717
28S-1722	G	386	233708	0.00165163	317	187720	0.00168869	351.5	0.978059	-0.479612	1.32467	0.00395819	0.165909
28S-1723	U	534	230243	0.00231929	479	185738	0.0025789	506.5	0.899332	-2.02312	0.648337	-0.00431453	0.323321
28S-1724	C	376	226611	0.00165923	378	180540	0.00209372	377	0.79248	-1.93402	0.668025	-0.0276185	0.319159
28S-1725	C	568	220976	0.00257041	554	175576	0.00315533	561	0.814627	-3.01136	0.488613	-0.0266861	0.354053
28S-1726	U	175	217473	0.000804698	163	173903	0.000937304	169	0.858523	-25.9044	0.0728504	-0.015673	0.397885
28S-1727	A	101	215053	0.000469652	100	172535	0.000579593	100.5	0.810314	-7.39662	0.233427	-0.0186185	0.38822
28S-1728	A	159	209918	0.000757439	161	168001	0.000958328	160	0.790375	-3.33611	0.452018	-0.0217869	0.360199
28S-1729	G	360	207235	0.00173716	371	166543	0.00222765	365.5	0.779816	-1.41471	0.81169	-0.0309781	0.286975
28S-1730	C	1579	205041	0.0077009	1303	164802	0.00790646	1441	0.974001	0.24719	2.60358	0.07633	0.0134571
28S-1731	C	389	200090	0.00194413	415	160846	0.00258011	402	0.753505	-0.640301	1.1949	-0.039641	0.195375
28S-1732	C	398	197156	0.00201871	490	159328	0.00307542	444	0.656401	0.274694	2.70231	-0.0721245	0.0103561
28S-1733	A	199	193447	0.00102871	181	157078	0.00115229	190	0.892746	-4.65639	0.346511	-0.0117766	0.375697
28S-1734	A	279	193283	0.00144348	255	158380	0.00161005	267	0.896542	-3.40007	0.445448	-0.00932005	0.361263
28S-1735	C	527	191289	0.00275499	521	156977	0.00331896	524	0.830078	-6.6176	0.257299	-0.0223978	0.385953
28S-1736	C	478	190111	0.00251432	705	157235	0.00448373	591.5	0.560765	0.608103	5.00132	-0.137857	1.47696e-06
28S-1737	U	452	187281	0.00241349	489	156784	0.00311894	470.5	0.773816	-0.950936	1.00465	-0.0385219	0.240847
28S-1738	G	574	187373	0.00306341	441	161816	0.00272532	507.5	1.12406	0.377715	3.14968	0.0538906	0.00279705
28S-1739	A	132	188385	0.000700693	160	165815	0.000964931	146	0.726159	-1.08014	0.942245	-0.0276422	0.25593
28S-1740	A	97	187827	0.000516433	104	167033	0.000622631	100.5	0.829436	-15.8185	0.116538	-0.0176566	0.396242
28S-1741	A	173	184815	0.000936071	238	165325	0.00143959	205.5	0.650235	-0.0303788	1.90221	-0.0433793	0.0653403
28S-1742	U	108	180587	0.00059805	134	163895	0.000817597	121	0.731473	-1.39788	0.817389	-0.0255352	0.285646
28S-1743	G	151	177250	0.000851904	216	161234	0.00133967	183.5	0.635907	-0.00751685	1.94538	-0.0433173	0.0601337
28S-1744	G	159	176006	0.000903378	200	160380	0.00124704	179.5	0.724419	-0.849005	1.06003	-0.0310989	0.227463
28S-1745	U	177	176121	0.00100499	166	161071	0.0010306	171.5	0.97515	-1.16174	0.906676	-0.00430198	0.264486
28S-1746	A	335	173540	0.00193039	260	158194	0.00164355	297.5	1.17452	0.296719	2.78694	0.0337335	0.00820958
28S-1747	G	532	169909	0.00313109	507	155410	0.00326234	519.5	0.959768	-0.402826	1.39718	0.0174337	0.150319
28S-1748	C	788	161213	0.00488794	888	148663	0.00597324	838	0.818307	-2.68658	0.531659	-0.033705	0.346363
28S-1749	A	128	158315	0.000808515	135	145560	0.000927453	131.5	0.871758	-11.901	0.151926	-0.0145291	0.394365
28S-1750	C	510	155283	0.00328433	600	142945	0.00419742	555	0.782463	-1.04308	0.959336	-0.0427228	0.251805
28S-1751	A	151	153470	0.000983906	109	140985	0.000773132	130	1.27262	0.144707	2.29161	0.014244	0.0288778
28S-1752	A	274	147311	0.00186001	274	135408	0.00202351	274	0.919198	-1.98039	0.657631	-0.00316713	0.321365
28S-1753	G	217	144277	0.00150405	250	133749	0.00186917	233.5	0.804661	-3.79341	0.408895	-0.0242896	0.366948
28S-1754	A	126	140595	0.000896191	107	131653	0.000812743	116.5	1.10268	-0.392847	1.40719	0.00284918	0.148224
28S-1755	C	611	136614	0.00447246	930	129612	0.00717526	770.5	0.623316	0.539135	4.25287	-0.16855	4.71402e-05
28S-1756	G	395	131697	0.00299931	430	126589	0.00339682	412.5	0.882976	-3.91767	0.398562	-0.00566233	0.368482
28S-1757	A	169	126711	0.00133374	161	124169	0.00129662	165	1.02863	-0.592962	1.23041	0.00536252	0.187141
28S-1758	G	146	120364	0.00121299	142	121927	0.00116463	144	1.04152	-0.602444	1.22313	0.0045451	0.188819
28S-1759	C	477	114996	0.00414797	700	118700	0.00589722	588.5	0.703377	0.134367	2.26424	-0.0971327	0.0307359
28S-1760	G	21	109320	0.000192097	52	113820	0.000456862	36.5	0.42047	0.041766	2.04543	-0.0348984	0.0492508
28S-1761	U	15	103215	0.000145328	1	109846	9.10365e-06	8	15.9637	0.355418	3.04073	-0.00359404	0.00391885
28S-1762	U	67	12659	0.00529268	14	12810	0.0010929	40.5	4.8428	0.598301	4.87927	0.393374	2.69914e-06
28S-1763	G	23	501	0.0459082	7	306	0.0228758	15	2.00684	-0.251486	1.56614	2.47086	0.117029
28S-1764	A	9	347	0.0259366	1	191	0.0052356	5	4.95389	-0.193803	1.64181	2.00171	0.103652
28S-1765	A	0	218	0	0	113	0	0	#DIV/0!	#DIV/0!	#DIV/0!	-0.0165155	#DIV/0!
28S-1766	C	0	201	0	3	115	0.026087	1.5	0	-0.131607	1.73205	-2.09622	0.0890161
28S-1767	G	0	182	0	0	112	0	0	#DIV/0!	#DIV/0!	#DIV/0!	-0.0165155	#DIV/0!
28S-1768	A	0	163	0	0	110	0	0	#DIV/0!	#DIV/0!	#DIV/0!	-0.0165155	#DIV/0!
28S-1769	A	0	158	0	0	105	0	0	#DIV/0!	#DIV/0!	#DIV/0!	-0.0165155	#DIV/0!
28S-1770	A	1	159	0.00628931	10	101	0.0990099	5.5	0.063522	0.17155	2.36587	-7.31919	0.0242923
28S-1771	G	1	165	0.00606061	0	104	0	0.5	#DIV/0!	-0.96	1	0.552615	0.241971
28S-1772	A	1	159	0.00628931	0	104	0	0.5	#DIV/0!	-0.96	1	0.574092	0.241971
28S-1773	G	0	158	0	0	112	0	0	#DIV/0!	#DIV/0!	#DIV/0!	-0.0165155	#DIV/0!
28S-1774	A	0	158	0	0	114	0	0	#DIV/0!	#DIV/0!	#DIV/0!	-0.0165155	#DIV/0!
28S-1775	C	0	161	0	0	116	0	0	#DIV/0!	#DIV/0!	#DIV/0!	-0.0165155	#DIV/0!
28S-1776	A	0	158	0	0	112	0	0	#DIV/0!	#DIV/0!	#DIV/0!	-0.0165155	#DIV/0!
28S-1777	C	0	164	0	0	115	0	0	#DIV/0!	#DIV/0!	#DIV/0!	-0.0165155	#DIV/0!
28S-1778	A	12	162	0.0740741	11	115	0.0956522	11.5	0.774411	-11.6087	0.155448	-0.686067	0.394151
28S-1779	G	0	151	0	1	109	0.00917431	0.5	0	-0.96	1	-0.747911	0.241971
28S-1780	U	0	150	0	0	110	0	0	#DIV/0!	#DIV/0!	#DIV/0!	-0.0165155	#DIV/0!
28S-1781	G	0	163	0	1	117	0.00854701	0.5	0	-0.96	1	-0.697901	0.241971
28S-1782	U	0	161	0	0	118	0	0	#DIV/0!	#DIV/0!	#DIV/0!	-0.0165155	#DIV/0!
28S-1783	G	0	160	0	0	115	0	0	#DIV/0!	#DIV/0!	#DIV/0!	-0.0165155	#DIV/0!
28S-1784	U	0	159	0	0	117	0	0	#DIV/0!	#DIV/0!	#DIV/0!	-0.0165155	#DIV/0!
28S-1785	U	0	161	0	0	115	0	0	#DIV/0!	#DIV/0!	#DIV/0!	-0.0165155	#DIV/0!
28S-1786	G	0	163	0	0	117	0	0	#DIV/0!	#DIV/0!	#DIV/0!	-0.0165155	#DIV/0!
28S-1787	A	0	161	0	0	116	0	0	#DIV/0!	#DIV/0!	#DIV/0!	-0.0165155	#DIV/0!
28S-1788	U	0	158	0	2	118	0.0169492	1	0	-0.385929	1.41421	-1.36774	0.146763
28S-1789	C	1	160	0.00625	0	120	0	0.5	#DIV/0!	-0.96	1	0.570401	0.241971
28S-1790	G	1	159	0.00628931	2	117	0.017094	1.5	0.367925	-2.94514	0.496814	-0.78868	0.352625
28S-1791	C	2	162	0.0123457	2	119	0.0168067	2	0.734568	-18.1867	0.102154	-0.197043	0.396866
28S-1792	A	1	160	0.00625	1	117	0.00854701	1	0.73125	-25.314	0.0744851	-0.110985	0.397837
28S-1793	A	0	159	0	0	115	0	0	#DIV/0!	#DIV/0!	#DIV/0!	-0.0165155	#DIV/0!
28S-1794	A	6	158	0.0379747	0	104	0	3	#DIV/0!	0.199833	2.44949	3.54956	0.0198622
28S-1795	G	1	151	0.00662252	0	101	0	0.5	#DIV/0!	-0.96	1	0.605382	0.241971
28S-1796	C	0	164	0	0	110	0	0	#DIV/0!	#DIV/0!	#DIV/0!	-0.0165155	#DIV/0!
28S-1797	G	1	170	0.00588235	0	114	0	0.5	#DIV/0!	-0.96	1	0.535876	0.241971
28S-1798	U	23	174	0.132184	7	112	0.0625	15	2.11494	-0.179522	1.66169	7.41379	0.100304
28S-1799	G	2	158	0.0126582	1	106	0.00943396	1.5	1.34177	-6.14975	0.274135	0.42008	0.38423
28S-1800	A	6	171	0.0350877	2	108	0.0185185	4	1.89474	-1.5748	0.761223	1.80212	0.298594
28S-1801	G	3	214	0.0140187	1	116	0.00862069	2	1.62617	-3.50856	0.434729	0.612672	0.362971
28S-1802	G	1	1486	0.000672948	0	676	0	0.5	#DIV/0!	-0.96	1	0.0466787	0.241971
28S-1803	C	10	27177	0.000367958	4	11343	0.00035264	7	1.04344	-6.60312	0.257789	-0.010075	0.385904
28S-1804	U	23	29148	0.000789076	7	12197	0.000573912	15	1.37491	-1.2641	0.865686	0.0118305	0.274269
28S-1805	C	85	31847	0.00266901	45	13551	0.00332079	65	0.803728	-8.26322	0.211589	-0.0306181	0.390111
28S-1806	G	55	33078	0.00166274	37	14211	0.00260362	46	0.638626	-1.10308	0.931969	-0.0679395	0.258407
28S-1807	U	68	33579	0.00202508	38	14470	0.00262612	53	0.771127	-4.82355	0.336564	-0.0357077	0.376975
28S-1808	G	125	35042	0.00356715	64	15131	0.00422973	94.5	0.843352	-62.5472	0.0308432	-0.0187397	0.398753
28S-1809	G	265	35544	0.00745555	144	15435	0.00932945	204.5	0.799142	-3.71554	0.415647	-0.0601537	0.365928
28S-1810	C	189	36775	0.00513936	125	16056	0.00778525	157	0.660141	-0.286703	1.52327	-0.154553	0.12504
28S-1811	A	56	38546	0.00145281	17	16880	0.00100711	36.5	1.44255	-0.316358	1.48896	0.039624	0.131673
28S-1812	A	75	39778	0.00188546	48	17912	0.00267977	61.5	0.703592	-1.74773	0.713315	-0.0530948	0.30933
28S-1813	G	152	41886	0.0036289	77	18808	0.004094	114.5	0.886394	-7.82803	0.22202	-0.00212073	0.38923
28S-1814	G	45	43096	0.00104418	39	19372	0.00201321	42	0.518663	-0.265522	1.54877	-0.0789579	0.120238
28S-1815	G	187	43812	0.00426824	101	19665	0.00513603	144	0.831038	-14.8924	0.123329	-0.0251551	0.39592
28S-1816	C	114	44588	0.00255674	45	20035	0.00224607	79.5	1.13832	-0.579339	1.24103	0.044518	0.184702
28S-1817	G	121	45725	0.00264625	43	20459	0.00210176	82	1.25906	-0.165758	1.68131	0.0644281	0.0970684
28S-1818	A	24	46371	0.000517565	9	20737	0.000434007	16.5	1.19253	-2.003	0.65268	-0.0025127	0.322409
28S-1819	A	33	49222	0.000670432	14	21610	0.000647848	23.5	1.03486	-3.29133	0.456734	-0.00520537	0.359428
28S-1820	A	96	52406	0.00183185	56	22623	0.00247536	76	0.740035	-2.4007	0.576351	-0.0418333	0.337892
28S-1821	G	85	55861	0.00152163	49	23888	0.00205124	67	0.741812	-2.69061	0.531077	-0.0371532	0.34647
28S-1822	G	66	56617	0.00116573	44	24303	0.00181048	55	0.643879	-0.98072	0.989539	-0.051381	0.244502
28S-1823	G	150	58599	0.00255977	98	25129	0.00389988	124	0.656372	-0.418249	1.38199	-0.0870427	0.153527
28S-1824	A	87	60206	0.00144504	36	25810	0.00139481	61.5	1.03601	-1.64633	0.740648	0.00798607	0.303244
28S-1825	A	34	63115	0.000538699	16	26988	0.000592856	25	0.908651	-11.0842	0.162196	-0.0131918	0.393729
28S-1826	U	32	67094	0.000476943	27	28471	0.000948333	29.5	0.502927	-0.429039	1.37155	-0.0473306	0.155748
28S-1827	C	180	70366	0.00255805	83	30181	0.00275007	131.5	0.930176	-2.9216	0.499796	0.00446078	0.352101
28S-1828	C	124	72308	0.00171489	63	31583	0.00199474	93.5	0.859702	-32.5741	0.0583783	-0.0145016	0.398263
28S-1829	C	168	75363	0.00222921	95	34023	0.00279223	131.5	0.798362	-4.76101	0.340218	-0.0297804	0.376509
28S-1830	G	80	76490	0.00104589	45	35133	0.00128085	62.5	0.81656	-12.1819	0.148688	-0.0204116	0.394557
28S-1831	U	233	77660	0.00300026	209	35815	0.00583554	221	0.514135	0.459064	3.62335	-0.199994	0.000562423
28S-1832	U	31	84042	0.000368863	26	41992	0.000619166	28.5	0.595742	-1.117	0.925838	-0.031238	0.259882
28S-1833	U	56	90759	0.000617019	82	48548	0.00168905	69	0.365305	0.42224	3.39241	-0.0932281	0.00126437
28S-1834	U	278	102645	0.00270836	302	65131	0.00463681	290	0.584101	0.379227	3.15735	-0.131839	0.00273019
28S-1835	U	530	114255	0.00463875	515	87177	0.00590752	522.5	0.785227	-1.1997	0.891031	-0.0518668	0.268231
28S-1836	A	1508	130270	0.011576	868	112817	0.00769388	1188	1.50457	0.798026	9.70423	0.457171	1.41814e-21
28S-1837	U	561	138949	0.00403745	699	128420	0.00544308	630	0.741759	-0.159764	1.69	-0.0713058	0.0956569
28S-1838	U	86	148708	0.000578315	106	140534	0.000754266	96	0.766725	-2.93628	0.497932	-0.0223396	0.352429
28S-1839	C	1130	157831	0.00715956	1111	152293	0.00729515	1120.5	0.981413	0.191137	2.42316	0.0742293	0.0211783
28S-1840	G	451	162257	0.00277954	491	160111	0.00306662	471	0.906385	-1.76398	0.709123	2.40351e-05	0.310253
28S-1841	G	381	165943	0.00229597	426	164501	0.00258965	403.5	0.886594	-3.50668	0.43491	-0.00736129	0.362942
28S-1842	G	225	167925	0.00133988	292	166066	0.00175834	258.5	0.762018	-1.26546	0.865165	-0.03087	0.274393
28S-1843	A	86	169263	0.000508085	89	167173	0.000532383	87.5	0.954361	-2.58682	0.546445	-0.0112456	0.343613
28S-1844	A	93	174183	0.000533921	103	171100	0.000601987	98	0.886931	-8.06311	0.216261	-0.0143685	0.389721
28S-1845	C	318	180555	0.00176124	400	175914	0.00227384	359	0.774565	-1.26293	0.866133	-0.0323991	0.274163
28S-1846	C	373	185089	0.00201525	525	179984	0.00291693	449	0.69088	0.0970237	2.1706	-0.0598141	0.0378286
28S-1847	U	343	187895	0.00182549	414	182793	0.00226486	378.5	0.806006	-2.89045	0.503798	-0.0256494	0.351395
28S-1848	G	273	194887	0.00140081	362	191808	0.0018873	317.5	0.742229	-0.644468	1.19187	-0.0354299	0.196082
28S-1849	G	314	197820	0.0015873	365	196576	0.00185679	339.5	0.854864	-29.7222	0.0637975	-0.0154845	0.398131
28S-1850	U	191	200706	0.000951641	310	198985	0.00155791	250.5	0.610846	0.239261	2.57644	-0.0513498	0.014437
28S-1851	U	226	207420	0.00108958	380	203744	0.00186509	303	0.584197	0.389909	3.21264	-0.0628857	0.00228943
28S-1852	G	433	211915	0.00204327	616	207725	0.00296546	524.5	0.689024	0.174986	2.37572	-0.0610515	0.0237314
28S-1853	G	391	214227	0.00182517	458	212404	0.00215627	424.5	0.846447	-63.5465	0.0303657	-0.0170226	0.398758
28S-1854	G	436	216949	0.00200969	569	213766	0.00266179	502.5	0.755014	-0.497035	1.30925	-0.039996	0.169312
28S-1855	G	464	219375	0.0021151	577	213890	0.00269765	520.5	0.784053	-1.16666	0.904618	-0.032956	0.264979
28S-1856	U	229	222488	0.00102927	248	214675	0.00115523	238.5	0.890961	-4.26209	0.372475	-0.0119581	0.372206
28S-1857	A	248	227504	0.00109009	197	213762	0.000921586	222.5	1.18284	0.204028	2.4624	0.0123804	0.0192423
28S-1858	A	174	230624	0.000754475	171	212221	0.000805764	172.5	0.936347	-2.0479	0.643065	-0.00990255	0.324424
28S-1859	C	598	235481	0.00253948	801	212393	0.00377131	699.5	0.673369	0.357776	3.0519	-0.0786982	0.0037878
28S-1860	G	393	236649	0.00166069	470	210781	0.0022298	431.5	0.744769	-0.44349	1.35782	-0.0383306	0.158694
28S-1861	U	798	237244	0.00336363	808	209827	0.00385079	803	0.873489	-3.85544	0.403671	-0.00764219	0.367727
28S-1862	U	242	242195	0.000999195	319	212815	0.00149895	280.5	0.666595	0.0285552	2.01761	-0.0421844	0.0521141
28S-1863	C	1417	245780	0.00576532	1791	212992	0.00840877	1604	0.685632	0.54067	4.26709	-0.145479	4.43693e-05
28S-1864	G	501	249718	0.00200626	553	220969	0.00250261	527	0.801667	-1.98106	0.657484	-0.0276279	0.321396
28S-1865	G	592	251477	0.00235409	636	221329	0.00287355	614	0.819228	-3.43999	0.441442	-0.0245363	0.361905
28S-1866	A	119	252606	0.000471089	141	219692	0.000641808	130	0.734004	-1.36639	0.828267	-0.0234434	0.283101
28S-1867	U	175	253120	0.000691372	162	215424	0.000752005	168.5	0.919371	-2.79083	0.517037	-0.0115426	0.349028
28S-1868	C	429	253291	0.0016937	539	210434	0.00256137	484	0.661248	0.284801	2.7405	-0.0616637	0.00933392
28S-1869	C	1436	251660	0.00570611	1673	203940	0.00820339	1554.5	0.695579	0.500183	3.92143	-0.134666	0.000182684
28S-1870	U	294	254027	0.00115736	254	204067	0.00124469	274	0.929836	-1.60487	0.752438	-0.00706131	0.300586
28S-1871	C	1395	259272	0.00538045	1318	209547	0.00628976	1356.5	0.85543	-13.003	0.13997	-0.0126888	0.395053
28S-1872	G	422	260311	0.00162114	389	211124	0.00184252	405.5	0.879849	-4.44752	0.359797	-0.0111695	0.373938
28S-1873	U	193	261876	0.00073699	218	212004	0.00102828	205.5	0.716719	-0.616962	1.21215	-0.0292842	0.191361
28S-1874	A	135	263136	0.000513043	94	208588	0.000450649	114.5	1.13845	-0.256189	1.56027	-0.00426412	0.118107
28S-1875	U	236	260978	0.000904291	282	205020	0.00137548	259	0.657439	0.0446284	2.05156	-0.0412525	0.0486364
28S-1876	C	438	260684	0.0016802	406	203253	0.00199751	422	0.841145	-19.6685	0.0948301	-0.0179799	0.397153
28S-1877	C	571	252815	0.00225857	613	199944	0.00306586	592	0.736684	-0.136851	1.72406	-0.0488378	0.0902537
28S-1878	G	541	251496	0.00215113	484	199976	0.00242029	512.5	0.888789	-2.77857	0.518714	-0.00746116	0.348725
28S-1879	U	878	252826	0.00347274	1112	201390	0.00552162	995	0.628935	0.58412	4.71289	-0.130598	5.99479e-06
28S-1880	C	667	253266	0.00263359	917	198986	0.00460836	792	0.571481	0.645659	5.5314	-0.136592	9.05706e-08
28S-1881	U	201	251377	0.000799596	196	195201	0.00100409	198.5	0.796336	-3.35131	0.450439	-0.0214766	0.360456
28S-1882	C	990	250250	0.00395604	1005	191570	0.00524612	997.5	0.754089	-0.0484844	1.86936	-0.0632491	0.0695158
28S-1883	G	549	248835	0.00220628	444	189969	0.00233722	496.5	0.943975	-0.662019	1.17929	0.00434041	0.19903
28S-1884	G	851	247028	0.00344495	620	187451	0.00330753	735.5	1.04155	0.289682	2.75933	0.0433049	0.0088629
28S-1885	C	801	246752	0.00324617	937	186161	0.00503328	869	0.644942	0.514614	4.03803	-0.112942	0.000114863
28S-1886	A	100	243109	0.000411338	94	180128	0.000521851	97	0.788229	-4.37059	0.364951	-0.0194912	0.37324
28S-1887	A	95	238323	0.000398619	76	175382	0.00043334	85.5	0.919876	-4.29928	0.369861	-0.0136294	0.372567
28S-1888	C	449	235622	0.00190559	443	172981	0.00256097	446	0.74409	-0.410267	1.38981	-0.041734	0.151871
28S-1889	G	792	231327	0.00342372	530	167260	0.00316872	661	1.08048	0.3628	3.07596	0.0523778	0.00351861
28S-1890	A	169	225215	0.000750394	117	158908	0.000736275	143	1.01918	-0.806388	1.08504	-0.00474597	0.221443
28S-1891	G	225	223057	0.00100871	187	155147	0.00120531	206	0.83689	-18.1549	0.102324	-0.0178807	0.396859
28S-1892	A	88	222079	0.000396255	95	153999	0.000616887	91.5	0.642347	-0.475895	1.32801	-0.0284841	0.165176
28S-1893	A	117	217423	0.000538122	110	149388	0.000736338	113.5	0.730808	-1.46375	0.795537	-0.0246847	0.290725
28S-1894	U	199	212043	0.000938489	181	147140	0.00123012	190	0.762924	-1.66986	0.73412	-0.0264531	0.304707
28S-1895	U	268	206411	0.00129838	286	141794	0.00201701	277	0.643715	0.14508	2.29261	-0.0553894	0.0288118
28S-1896	G	372	203473	0.00182825	300	138913	0.00215963	336	0.84656	-75.1485	0.0257392	-0.0170005	0.39881
28S-1897	G	853	202473	0.00421291	603	138814	0.00434394	728	0.969835	-0.0989566	1.78351	0.0327959	0.0813176
28S-1898	C	2115	201469	0.0104979	1640	137262	0.011948	1877.5	0.878635	-1.6457	0.740824	0.0167895	0.303204
28S-1899	C	508	197537	0.00257167	452	131661	0.00343306	480	0.74909	-0.436059	1.36485	-0.0487095	0.157183
28S-1900	A	198	191769	0.00103249	126	125235	0.00100611	162	1.02622	-0.642559	1.19326	0.000233204	0.195758
28S-1901	U	189	185235	0.00102033	162	121269	0.00133587	175.5	0.763789	-1.81374	0.696581	-0.0271989	0.313
28S-1902	G	303	182038	0.00166449	225	117233	0.00191925	264	0.867257	-10.3943	0.172016	-0.0132162	0.393083
28S-1903	G	352	177620	0.00198176	288	111010	0.00259436	320	0.763872	-1.09038	0.937627	-0.0372433	0.257043
28S-1904	G	318	175409	0.00181291	217	107088	0.00202637	267.5	0.894656	-3.62287	0.423979	-0.0078183	0.36465
28S-1905	A	167	171124	0.000975901	109	101070	0.00107846	138	0.904902	-4.30156	0.369702	-0.0108492	0.372589
28S-1906	A	114	161041	0.000707894	72	89510	0.000804379	93	0.88005	-10.5004	0.170429	-0.0141664	0.39319
28S-1907	G	322	157232	0.00204793	255	86136	0.00296043	288.5	0.691766	-0.143617	1.71386	-0.0602136	0.0918501
28S-1908	C	451	153428	0.00293949	332	82974	0.00400125	391.5	0.734642	-0.39204	1.40801	-0.0594665	0.148054
28S-1909	U	117	142080	0.00082348	86	77311	0.00111239	101.5	0.74028	-1.88546	0.679269	-0.0278675	0.31675
28S-1910	G	154	139200	0.00110632	97	74682	0.00129884	125.5	0.851777	-106.42	0.0182461	-0.0161709	0.398876
28S-1911	G	328	138720	0.00236448	174	76509	0.00227424	251	1.03968	-0.251333	1.56633	0.0242169	0.116994
28S-1912	C	1326	138023	0.00960709	735	75219	0.00977147	1030.5	0.983178	0.148493	2.3018	0.106652	0.0282099
28S-1913	G	501	135852	0.00368784	317	74277	0.00426781	409	0.864106	-10.1602	0.175624	-0.0104421	0.392837
28S-1914	G	423	132862	0.00318375	301	72696	0.00414053	362	0.768924	-1.1141	0.927107	-0.0476319	0.259577
28S-1915	G	280	132063	0.0021202	159	72058	0.00220656	219.5	0.960864	-1.18481	0.897104	0.00667393	0.266779
28S-1916	A	85	129881	0.000654445	46	69653	0.000660417	65.5	0.990958	-2.21115	0.610373	-0.00770861	0.331139
28S-1917	G	74	127217	0.000581683	46	67023	0.000686332	60	0.847525	-306.407	0.00637592	-0.0166074	0.398934
28S-1918	U	67	123248	0.000543619	44	65458	0.000672187	55.5	0.808733	-10.0521	0.177342	-0.0190542	0.392718
28S-1919	G	118	118930	0.00099218	78	60730	0.00128437	98	0.772501	-3.28763	0.457129	-0.0257362	0.359363
28S-1920	C	1350	117591	0.0114805	842	58892	0.0142974	1096	0.802978	-1.17906	0.899471	-0.0782395	0.266212
28S-1921	C	303	114495	0.0026464	185	56237	0.00328965	244	0.804464	-3.786	0.409528	-0.0302586	0.366853
28S-1922	G	399	113333	0.0035206	234	55594	0.00420909	316.5	0.836428	-14.2393	0.128615	-0.0214655	0.395656
28S-1923	G	333	111925	0.00297521	216	55115	0.00391908	274.5	0.75916	-1.16898	0.90365	-0.0495613	0.265211
28S-1924	G	161	111650	0.00144201	104	55028	0.00188995	132.5	0.762988	-2.26907	0.599558	-0.0317722	0.333313
28S-1925	A	35	110744	0.000316044	32	54765	0.000584315	33.5	0.54088	-0.536464	1.27566	-0.0334197	0.176826
28S-1926	A	55	108245	0.000508107	20	53240	0.000375657	37.5	1.35258	-0.448564	1.35306	0.00125085	0.15972
28S-1927	G	61	107270	0.000568659	39	52871	0.000737644	50	0.770911	-4.89321	0.332586	-0.0219213	0.377477
28S-1928	A	78	104899	0.000743572	49	51686	0.000948032	63.5	0.784332	-5.37227	0.307583	-0.0222683	0.38051
28S-1929	G	60	102268	0.000586694	36	49989	0.000720158	48	0.814673	-13.1041	0.138966	-0.0188337	0.395109
28S-1930	U	99	97501	0.00101537	100	48433	0.00206471	99.5	0.491776	0.262916	2.65913	-0.0857681	0.0116271
28S-1931	U	46	92941	0.000494938	61	47350	0.00128828	53.5	0.384185	0.302724	2.81094	-0.0727419	0.00767627
28S-1932	U	44	88300	0.000498301	88	46712	0.00188388	66	0.264507	0.562774	4.48281	-0.119909	1.72668e-05
28S-1933	U	166	84735	0.00195905	184	48253	0.00381323	175	0.51375	0.400891	3.27153	-0.136547	0.0018915
28S-1934	C	1170	85442	0.0136935	1556	51031	0.0304913	1363	0.449096	0.830148	11.5394	-1.16143	4.85121e-30
28S-1935	U	127	81557	0.00155719	119	51367	0.00231666	123	0.672171	-0.524143	1.28597	-0.0549741	0.174506
28S-1936	U	251	81218	0.00309045	405	53768	0.00753236	328	0.410289	0.695801	6.44315	-0.326798	3.85686e-10
28S-1937	U	848	80634	0.0105167	718	55075	0.0130368	783	0.806692	-1.75426	0.711625	-0.0682512	0.309702
28S-1938	U	116	82856	0.00140002	151	63063	0.00239443	133.5	0.584698	0.0849154	2.14188	-0.0759336	0.0402454
28S-1939	C	671	86692	0.00774005	722	68308	0.0105698	696.5	0.732281	-0.00568609	1.94892	-0.132319	0.0597205
28S-1940	U	105	89799	0.00116928	106	81263	0.00130441	105.5	0.896406	-6.01887	0.279247	-0.0107027	0.383687
28S-1941	G	102	94150	0.00108338	122	85707	0.00142345	112	0.761091	-2.39571	0.577198	-0.02826	0.337727
28S-1942	U	82	94457	0.00086812	86	87814	0.000979343	84	0.886431	-8.90647	0.19785	-0.0130686	0.39121
28S-1943	G	113	96520	0.00117074	138	89113	0.0015486	125.5	0.756002	-2.02356	0.648243	-0.0300325	0.323341
28S-1944	U	63	95839	0.000657352	53	89070	0.000595038	58	1.10472	-0.960167	0.999915	-0.00222344	0.241991
28S-1945	A	48	98283	0.000488386	40	90357	0.000442688	44	1.10323	-1.26211	0.866449	-0.00594495	0.274088
28S-1946	A	147	96026	0.00153084	122	88586	0.00137719	134.5	1.11156	-0.257905	1.55815	0.0174473	0.118499
28S-1947	G	125	98400	0.00127033	129	89276	0.00144496	127	0.879144	-8.9569	0.196848	-0.0124187	0.391287
28S-1948	G	132	98415	0.00134126	127	89027	0.00142653	129.5	0.940223	-2.3751	0.580723	-0.00428874	0.337039
28S-1949	G	136	98845	0.00137589	138	89343	0.00154461	137	0.89077	-5.96709	0.281322	-0.0104497	0.383464
28S-1950	A	73	98950	0.000737746	80	89019	0.000898685	76.5	0.820918	-12.3538	0.146774	-0.0188813	0.394668
28S-1951	G	85	101322	0.00083891	82	89318	0.000918068	83.5	0.913777	-4.83122	0.336122	-0.0109267	0.377031
28S-1952	A	42	101991	0.000411801	40	89009	0.000449393	41	0.91635	-7.01543	0.244528	-0.0136712	0.387192
28S-1953	U	64	104784	0.00061078	51	88700	0.000574972	57.5	1.06228	-1.31221	0.847674	-0.00499719	0.278534
28S-1954	A	139	111333	0.00124851	97	89842	0.00107967	118	1.15637	-0.174893	1.66824	0.0146537	0.0992171
28S-1955	C	556	113753	0.00488778	600	88012	0.00681725	578	0.716973	0.0337324	2.02842	-0.101006	0.0509867
28S-1956	A	134	118018	0.00113542	139	88599	0.00156887	136.5	0.72372	-1.10549	0.930902	-0.0349655	0.258663
28S-1957	A	129	120926	0.00106677	112	87556	0.00127918	120.5	0.833946	-19.0688	0.0976643	-0.018318	0.397044
28S-1958	A	236	128790	0.00183244	164	90334	0.00181548	200	1.00934	-0.613019	1.21511	0.0108284	0.190674
28S-1959	C	278	135876	0.00204598	265	92895	0.00285268	271.5	0.717214	-0.415887	1.38429	-0.0518062	0.153038
28S-1960	C	179	141900	0.00126145	158	95332	0.00165737	168.5	0.761118	-1.77661	0.705896	-0.0301856	0.310962
28S-1961	C	370	143093	0.00258573	302	94098	0.00320942	336	0.805669	-3.10893	0.47701	-0.0295601	0.356042
28S-1962	U	428	144177	0.00296857	308	95806	0.00321483	368	0.9234	-1.44861	0.800454	0.00596	0.289586
28S-1963	G	244	148692	0.00164098	184	98325	0.00187135	214	0.876897	-7.32694	0.235381	-0.0116047	0.388042
28S-1964	G	431	151527	0.00284438	281	99628	0.00282049	356	1.00847	-0.21913	1.6077	0.0257346	0.109559
28S-1965	A	90	155275	0.000579617	68	100133	0.000679097	79	0.853511	-81.9228	0.0236364	-0.0162247	0.398831
28S-1966	A	295	161209	0.00182992	277	100854	0.00274654	286	0.666264	0.036565	2.03439	-0.0636341	0.0503728
28S-1967	U	117	170962	0.000684363	106	105703	0.00100281	111.5	0.682445	-0.713311	1.14398	-0.0321955	0.207362
28S-1968	U	105	179138	0.00058614	102	112519	0.000906514	103.5	0.646587	-0.425313	1.37514	-0.0337423	0.154983
28S-1969	C	726	188317	0.0038552	649	120275	0.00539597	687.5	0.71446	0.127923	2.24751	-0.0846647	0.031918
28S-1970	C	595	194746	0.00305526	487	130358	0.00373587	541	0.817819	-3.53269	0.432414	-0.0274375	0.363335
28S-1971	U	299	202088	0.00147955	277	136316	0.00203204	288	0.728111	-0.510325	1.29773	-0.0395745	0.171874
28S-1972	C	798	210536	0.00379033	561	143392	0.00391235	679.5	0.96881	-0.146944	1.70889	0.02752	0.0926348
28S-1973	C	896	215320	0.00416125	715	147676	0.00484168	805.5	0.859464	-10.273	0.173866	-0.0117359	0.392958
28S-1974	G	415	217606	0.00190712	356	149808	0.00237638	385.5	0.802532	-2.5632	0.550067	-0.0268744	0.342931
28S-1975	C	582	218341	0.00266556	532	150386	0.00353756	557	0.7535	-0.397145	1.40286	-0.0482244	0.149128
28S-1976	G	493	220054	0.00224036	460	151485	0.0030366	476.5	0.737784	-0.283735	1.5268	-0.0482156	0.12437
28S-1977	G	161	220882	0.000728896	155	152071	0.00101926	158	0.715122	-0.824085	1.07451	-0.029325	0.223974
28S-1978	A	127	221884	0.000572371	90	152755	0.000589179	108.5	0.971473	-1.81057	0.697366	-0.00973667	0.312829
28S-1979	G	99	224505	0.00044097	108	154272	0.000700062	103.5	0.629901	-0.297401	1.51071	-0.030916	0.127446
28S-1980	A	121	224285	0.000539492	75	154090	0.000486729	98	1.1084	-0.501748	1.30515	-0.00465667	0.170224
28S-1981	G	135	225812	0.000597842	164	154902	0.00105873	149.5	0.564677	0.207852	2.47429	-0.0447787	0.018686
28S-1982	A	193	225583	0.000855561	79	154686	0.000510712	136	1.67523	0.487393	3.8236	0.0231123	0.000266835
28S-1983	U	153	227785	0.000671686	155	156455	0.0009907	154	0.677991	-0.410173	1.3899	-0.0324205	0.151852
28S-1984	A	406	228995	0.00177296	307	156729	0.0019588	356.5	0.90513	-2.25766	0.601659	-0.00618178	0.332893
28S-1985	G	422	227071	0.00185845	377	154373	0.00244214	399.5	0.760993	-0.799773	1.08903	-0.0366872	0.220485
28S-1986	G	275	226399	0.00121467	215	153721	0.00139864	245	0.868466	-10.075	0.176975	-0.0139524	0.392743
28S-1987	G	516	225930	0.00228389	402	152308	0.00263939	459	0.865311	-8.63644	0.203395	-0.0124606	0.390775
28S-1988	U	261	226008	0.00115483	179	151863	0.00117869	220	0.979751	-0.859591	1.054	-0.00203769	0.228918
28S-1989	U	359	227482	0.00157815	320	151692	0.00210954	339.5	0.748101	-0.689672	1.15999	-0.036494	0.203574
28S-1990	A	191	230133	0.000829955	185	152097	0.00121633	188	0.682344	-0.315104	1.49038	-0.0355456	0.131395
28S-1991	A	124	232437	0.000533478	72	157697	0.000456572	98	1.16844	-0.257497	1.55865	-0.00281729	0.118406
28S-1992	U	418	233219	0.00179231	346	159349	0.00217133	382	0.82544	-6.17046	0.273344	-0.0213095	0.384313
28S-1993	C	2366	232639	0.0101703	2231	157301	0.014183	2298.5	0.717074	0.513771	4.03103	-0.19216	0.000118154
28S-1994	U	784	230869	0.00339587	590	155113	0.00380368	687	0.892784	-1.98858	0.655831	-0.000858754	0.321745
28S-1995	U	678	240536	0.0028187	762	172486	0.00441775	720	0.638041	0.486485	3.81683	-0.104013	0.000273824
28S-1996	C	1785	250504	0.00712563	1462	187255	0.00780754	1623.5	0.912661	-0.347629	1.45441	0.0301952	0.138541
28S-1997	C	813	254900	0.00318949	1053	198152	0.0053141	933	0.600193	0.628014	5.26902	-0.140653	3.73545e-07
28S-1998	G	1132	266208	0.00425231	957	211447	0.00452596	1044.5	0.939539	-0.197959	1.63612	0.0219859	0.104625
28S-1999	A	152	271351	0.00056016	101	218295	0.000462677	126.5	1.21069	0.0102333	1.98026	-0.000798349	0.0561537
28S-2000	A	147	272446	0.000539556	143	217846	0.000656427	145	0.82196	-9.07795	0.194484	-0.0181794	0.391468
28S-2001	G	230	272822	0.000843041	276	217677	0.00126793	253	0.664893	-0.0110257	1.93863	-0.0384308	0.0609274
28S-2002	A	156	271567	0.000574444	109	216122	0.000504345	132.5	1.13899	-0.165753	1.68132	-0.00277888	0.0970671
28S-2003	G	161	272485	0.000590858	210	217073	0.000967416	185.5	0.610759	0.121858	2.23199	-0.0381545	0.0330472
28S-2004	C	1264	272412	0.00464003	1142	217172	0.0052585	1203	0.882386	-1.92763	0.669483	-5.273e-06	0.318848
28S-2005	G	531	272132	0.00195126	564	216633	0.00260348	547.5	0.749481	-0.34525	1.45698	-0.0408345	0.138024
28S-2006	U	403	270961	0.0014873	367	216153	0.00169787	385	0.875979	-5.37815	0.307299	-0.0122063	0.380543
28S-2007	U	502	269449	0.00186306	800	215624	0.00371016	651	0.502151	0.7037	6.61491	-0.137344	1.25654e-10
28S-2008	G	541	268183	0.00201728	442	214389	0.00206167	491.5	0.978467	-0.247711	1.57088	0.00855935	0.116163
28S-2009	C	944	262204	0.00360025	948	214722	0.00441501	946	0.815457	-2.16654	0.618972	-0.0304024	0.329394
28S-2010	A	442	261392	0.00169095	324	212810	0.00152248	383	1.11065	0.251104	2.61718	0.0208998	0.0129875
28S-2011	C	894	258795	0.00345447	976	209954	0.00464864	935	0.743115	0.0364913	2.03423	-0.0627171	0.0503887
28S-2012	U	179	257975	0.000693866	235	209144	0.00112363	207	0.617523	0.140084	2.27929	-0.0409349	0.0297024
28S-2013	U	392	255147	0.00153637	534	206705	0.00258339	463	0.59471	0.485216	3.80743	-0.0781938	0.000283816
28S-2014	G	736	256543	0.00286891	566	212851	0.00265914	651	1.07889	0.35684	3.04745	0.0409024	0.00383945
28S-2015	A	505	255415	0.00197717	432	211832	0.00203935	468.5	0.969511	-0.365433	1.43544	0.00657272	0.14239
28S-2016	G	767	257274	0.00298126	614	213650	0.00287386	690.5	1.03737	0.253964	2.62722	0.034334	0.0126503
28S-2017	C	2399	256667	0.00934674	2018	211767	0.00952934	2208.5	0.980838	0.421545	3.38834	0.101506	0.00128198
28S-2018	G	547	253813	0.00215513	444	207095	0.00214394	495.5	1.00522	-0.0444235	1.87663	0.0149456	0.0685758
28S-2019	A	144	251742	0.000572014	130	202410	0.000642261	137	0.890626	-5.99241	0.280304	-0.014002	0.383574
28S-2020	C	395	249863	0.00158087	372	198835	0.0018709	383.5	0.844977	-41.6765	0.0459269	-0.0172137	0.398522
28S-2021	G	265	248764	0.00106527	238	197819	0.00120312	251.5	0.88542	-4.88076	0.33329	-0.0123952	0.377389
28S-2022	U	817	246514	0.00331421	681	195827	0.00347756	749	0.953029	-0.240554	1.57994	0.0174725	0.114516
28S-2023	C	880	246927	0.00356381	904	196176	0.00460811	892	0.773378	-0.408426	1.39162	-0.0492187	0.151488
28S-2024	C	805	245593	0.00327778	1076	193991	0.00554665	940.5	0.590948	0.645162	5.52365	-0.150901	9.45376e-08
28S-2025	G	1366	243118	0.00561867	1148	193352	0.00593736	1257	0.946325	-0.0197256	1.92209	0.0377759	0.062904
28S-2026	U	319	240544	0.00132616	278	194032	0.00143275	298.5	0.925603	-1.6271	0.746069	-0.00620243	0.302024
28S-2027	G	783	240503	0.00325568	724	192442	0.00376217	753.5	0.865371	-6.45764	0.262818	-0.0107144	0.385399
28S-2028	C	874	239937	0.00364262	1043	189953	0.00549083	958.5	0.663401	0.48529	3.80797	-0.11219	0.000283226
28S-2029	A	144	231370	0.00062238	163	181403	0.000898552	153.5	0.692648	-0.557624	1.25833	-0.0297044	0.180752
28S-2030	U	721	224665	0.00320922	529	178002	0.00297188	625	1.07986	0.34534	2.99392	0.0479273	0.00451334
28S-2031	U	134	219250	0.000611174	149	174682	0.000852979	141.5	0.716518	-0.945394	1.00751	-0.0271235	0.240154
28S-2032	C	1042	216336	0.00481658	1578	169224	0.00932492	1310	0.516528	0.779647	8.89482	-0.307609	2.63447e-18
28S-2033	U	199	207610	0.000958528	206	166474	0.00123743	202.5	0.774612	-2.00724	0.65176	-0.025154	0.322602
28S-2034	U	442	203359	0.0021735	628	162577	0.00386279	535	0.562676	0.584821	4.72085	-0.120359	5.77386e-06
28S-2035	G	216	203840	0.00105965	196	163474	0.00119897	206	0.883806	-5.7916	0.288592	-0.0125912	0.38267
28S-2036	U	183	199985	0.000915069	158	160618	0.0009837	170.5	0.930231	-2.28687	0.596313	-0.00900723	0.33396
28S-2037	C	1219	198907	0.00612849	1332	157419	0.00846149	1275.5	0.72428	0.308171	2.83307	-0.115578	0.00721146
28S-2038	G	366	190470	0.00192156	413	149216	0.0027678	389.5	0.694256	0.0109284	1.98166	-0.056723	0.0559991
28S-2039	G	235	186065	0.001263	195	144789	0.00134679	215	0.937787	-1.69104	0.728343	-0.00528029	0.305997
28S-2040	U	236	180567	0.00130699	243	142856	0.00170101	239.5	0.768362	-1.54095	0.771366	-0.0293886	0.296283
28S-2041	C	672	175104	0.00383772	644	135118	0.0047662	658	0.805194	-1.88976	0.678258	-0.0361003	0.316968
28S-2042	C	492	166068	0.00296264	580	127288	0.0045566	536	0.650188	0.363343	3.07858	-0.101565	0.00349031
28S-2043	U	322	156975	0.00205128	269	121175	0.00221993	295.5	0.92403	-1.69559	0.727115	-0.000864143	0.306271
28S-2044	U	430	154071	0.00279092	396	119005	0.00332759	413	0.838721	-14.9225	0.123096	-0.0197123	0.395931
[truncated: 3,821 more rows]
